# Supplementary material for: Palladium-catalyzed [4 + 3] annulation of 2-bromobiphenyls and epoxides for the assembly of dihydrodibenzo[b,d]oxepines
Source: Royal Society of Chemistry journal article supplement (doi:10.1039/d2ob01720b), 2022-01-01

## Supporting Information

### Palladium-catalyzed [4+3] annulation of 2-bromobiphenyls and epoxides for the assembly of dihydrodibenzo[*b,d*]oxepines

Zipei Shen<sup>1#</sup>, Lan Zhou<sup>1#</sup>, Chenggui Wu<sup>2</sup>, Qianghui Zhou<sup>1,3\*</sup> and Hong-Gang Cheng<sup>1\*</sup>

<sup>1</sup>Sauvage Center for Molecular Sciences, Engineering Research Center of Organosilicon Compounds & Materials (Ministry of Education), Hubei Key Lab on Organic and Polymeric Opto-Electronic Materials, College of Chemistry and Molecular Sciences, Wuhan University, Wuhan, 430072 (China). E-mail: hgcheng@whu.edu.cn, qhzhou@whu.edu.cn

<sup>2</sup>Key Laboratory of Xin'an Medicine, Ministry of Education, Anhui University of Chinese Medicine, Hefei, Anhui, China.

<sup>3</sup>The Institute for Advanced Studies, Wuhan University, Wuhan, 430072 (China).

<sup>#</sup>These authors contributed equally.

#### Table of contents

|                                                                    |    |
|--------------------------------------------------------------------|----|
| 1. General principles .....                                        | 2  |
| 2. Optimization of reaction conditions .....                       | 3  |
| 3. Preparation of substrates .....                                 | 12 |
| 4. General procedure for palladium-catalyzed [4+3] annulation..... | 12 |
| 5. Characterization data for products.....                         | 13 |
| 6. Scale-up experiment .....                                       | 29 |
| 7. References.....                                                 | 30 |
| 8. Copies of NMR spectra.....                                      | 31 |

## 1. General principles

All reactions dealing with air- or moisture-sensitive compounds were performed by standard Schlenk techniques in oven-dried reaction vessels under argon atmosphere or in the argon-filled glove box. Anhydrous DMF, CH<sub>3</sub>CN, THF and Toluene were dried by JC Meyer Solvent Drying System. Anhydrous (over molecular sieve) NMP, DMA, DMSO, 1,4-dioxane and DCE were purchased from Energy Chemical and used as received. Most reagents were purchased from commercial sources and used without further purification, unless otherwise stated. Reactions were monitored by thin layer chromatography (TLC) carried out on 0.2 mm commercial silica gel plates, using UV light as the visualizing agent or basic solution of KMnO<sub>4</sub> or acidic solution of *p*-anisaldehyde and heat as a developing agent. NMR spectra were recorded on a Bruker spectrometer at 400 MHz (<sup>1</sup>H NMR), 100 MHz (<sup>13</sup>C NMR), 376 MHz (<sup>19</sup>F NMR) or Bruker spectrometer at 600MHz (<sup>1</sup>H NMR), 150 MHz (<sup>13</sup>C NMR) and were calibrated using residual undeuterated solvent as an internal reference (CDCl<sub>3</sub> @7.26 ppm <sup>1</sup>H NMR, 77.16 ppm <sup>13</sup>C NMR; DMSO-*d*<sub>6</sub> @ 2.50 ppm <sup>1</sup>H NMR, 39.5 ppm <sup>13</sup>C NMR). The following abbreviations were used to explain multiplicities: s = singlet, d = doublet, t = triplet, q = quartet, dd = doublet of doublets, dt = doublet of triplets, td = triplet of doublets, ddd = doublet of doublet of doublets, m = multiplet, br = broad. High resolution mass spectra (HRMS) were recorded on DIONEX UltiMate 3000 & Bruker Compact TOF mass spectrometer.

## 2. Optimization of reaction conditions

Table S1. Screening of bases

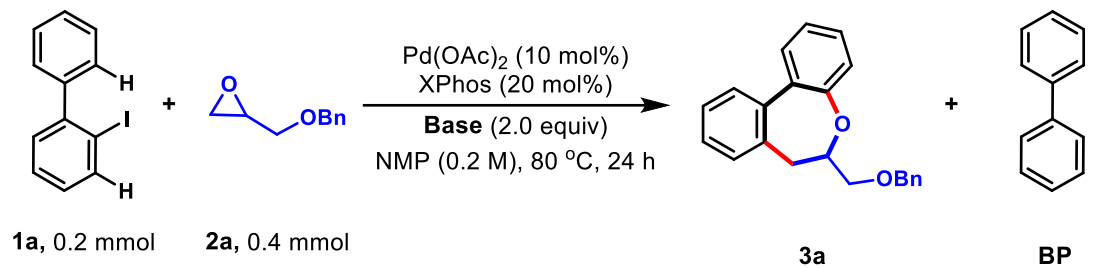

| Entry | Base                                | Conversion of <b>1a</b> <sup>[a]</sup> | Yield of <b>3a</b> <sup>[a]</sup> | Yield of <b>BP</b> <sup>[a]</sup> |
|-------|-------------------------------------|----------------------------------------|-----------------------------------|-----------------------------------|
| 1     | K <sub>2</sub> CO <sub>3</sub>      | 34                                     | 17                                | 7                                 |
| 2     | <b>Na<sub>2</sub>CO<sub>3</sub></b> | <b>60</b>                              | <b>55</b>                         | <b>3</b>                          |
| 3     | Cs <sub>2</sub> CO <sub>3</sub>     | 90                                     | 3                                 | 74                                |
| 4     | K <sub>3</sub> PO <sub>4</sub>      | 50                                     | 5                                 | 33                                |
| 5     | KHCO <sub>3</sub>                   | 34                                     | 25                                | 2                                 |
| 6     | NaHCO <sub>3</sub>                  | 29                                     | 22                                | 5                                 |
| 7     | KOAc                                | 42                                     | 26                                | 4                                 |
| 8     | NaOAc                               | 1                                      | trace                             | trace                             |
| 9     | CsOAc                               | 39                                     | 2                                 | 22                                |

[a] GC yield with *n*-tridecane as an internal standard.

**Table S2.** Screening of solvents

Reaction scheme showing the synthesis of **3a** and **BP** from **1a** and **2a**. Reagents: Pd(OAc)<sub>2</sub> (10 mol%), XPhos (20 mol%), Na<sub>2</sub>CO<sub>3</sub> (2.0 equiv). Solvent (0.2 M), 80 °C, 24 h.

**1a**, 0.2 mmol      **2a**, 0.4 mmol

**3a**      **BP**

| Entry | Solvent            | Conversion of <b>1a</b> <sup>[a]</sup> | Yield of <b>3a</b> <sup>[a]</sup> | Yield of <b>BP</b> <sup>[a]</sup> |
|-------|--------------------|----------------------------------------|-----------------------------------|-----------------------------------|
| 1     | <b>NMP</b>         | <b>60</b>                              | <b>55</b>                         | <b>3</b>                          |
| 2     | DMF                | 28                                     | 12                                | 3                                 |
| 3     | DMA                | 30                                     | 22                                | 5                                 |
| 4     | CH <sub>3</sub> CN | 9                                      | trace                             | 2                                 |
| 5     | 1,4-dioxane        | 10                                     | trace                             | 9                                 |
| 6     | DMSO               | 16                                     | trace                             | trace                             |
| 7     | DCE                | 9                                      | trace                             | 3                                 |
| 8     | Toluene            | 10                                     | trace                             | 9                                 |
| 9     | THF                | 11                                     | trace                             | 8                                 |

[a] GC yield with *n*-tridecane as an internal standard.



**Table S4.** Screening of palladium catalysts

$\text{1a, 0.2 mmol} + \text{2a, 0.4 mmol} \xrightarrow[\text{NMP (0.2 M), 80 }^\circ\text{C, 24 h}]{\text{[Pd] cat. (10 mol\%), XPhos (20 mol\%), Na}_2\text{CO}_3 \text{ (2.0 equiv)}} \text{3a} + \text{BP}$

| Entry | [Pd] cat.                                           | Conversion of <b>1a</b> <sup>[a]</sup> | Yield of <b>3a</b> <sup>[a]</sup> | Yield of <b>BP</b> <sup>[a]</sup> |
|-------|-----------------------------------------------------|----------------------------------------|-----------------------------------|-----------------------------------|
| 1     | <b>Pd(OAc)<sub>2</sub></b>                          | <b>60</b>                              | <b>55</b>                         | <b>3</b>                          |
| 2     | PdCl <sub>2</sub>                                   | 22                                     | 2                                 | 2                                 |
| 3     | Pd(OOCCF <sub>3</sub> ) <sub>2</sub>                | 41                                     | 17                                | 8                                 |
| 4     | Pd(CH <sub>3</sub> CN) <sub>2</sub> Cl <sub>2</sub> | 23                                     | 1                                 | 2                                 |
| 5     | [Pd(C <sub>3</sub> H <sub>5</sub> )Cl] <sub>2</sub> | 35                                     | 4                                 | 5                                 |
| 6     | Pd <sub>2</sub> dba <sub>3</sub>                    | 25                                     | 3                                 | 6                                 |

[a] GC yield with *n*-tridecane as an internal standard.

**Table S5.** Screening of reaction temperature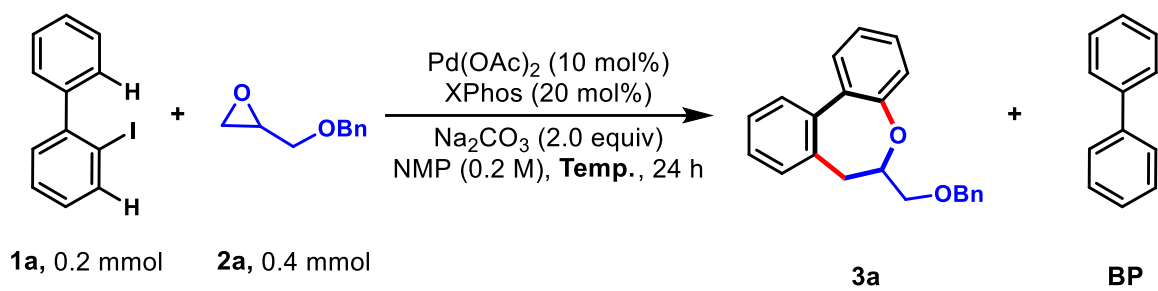

| Entry    | Temp. [°C] | Conversion of <b>1a</b> <sup>[a]</sup> | Yield of <b>3a</b> <sup>[a]</sup> | Yield of <b>BP</b> <sup>[a]</sup> |
|----------|------------|----------------------------------------|-----------------------------------|-----------------------------------|
| 1        | 60         | 18                                     | 5                                 | 3                                 |
| 2        | 70         | 33                                     | 18                                | trace                             |
| 3        | 80         | 60                                     | 55                                | 3                                 |
| 4        | 90         | 64                                     | 60                                | 3                                 |
| 5        | 100        | 81                                     | 67                                | 6                                 |
| <b>6</b> | <b>110</b> | <b>100</b>                             | <b>73</b>                         | <b>7</b>                          |
| 7        | 120        | 100                                    | 59                                | 7                                 |
| 8        | 130        | 100                                    | 53                                | 6                                 |

[a] GC yield with *n*-tridecane as an internal standard.

**Table S6.** Screening of reaction concentration

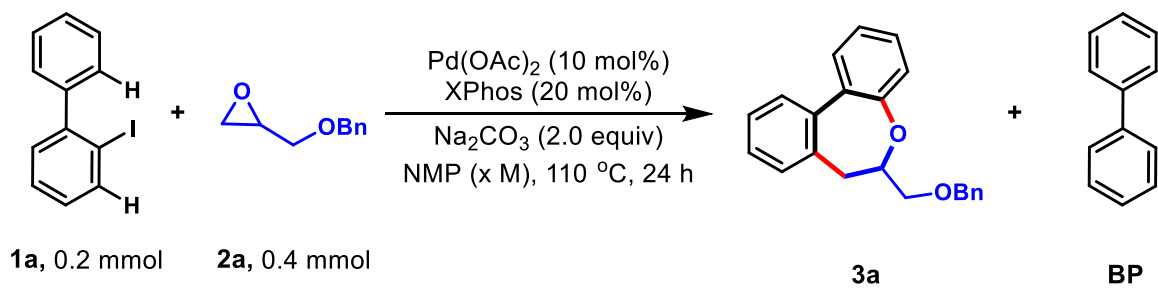

| Entry    | x          | Conversion of <b>1a</b> <sup>[a]</sup> | Yield of <b>3a</b> <sup>[a]</sup> | Yield of <b>BP</b> <sup>[a]</sup> |
|----------|------------|----------------------------------------|-----------------------------------|-----------------------------------|
| 1        | 0.1        | 84                                     | 40                                | 5                                 |
| 2        | 0.15       | 100                                    | 67                                | 4                                 |
| <b>3</b> | <b>0.2</b> | <b>100</b>                             | <b>73</b>                         | <b>7</b>                          |
| 4        | 0.25       | 100                                    | 71                                | 5                                 |
| 5        | 0.3        | 100                                    | 61                                | 5                                 |
| 6        | 0.4        | 100                                    | 54                                | 3                                 |

[a] GC yield with *n*-tridecane as an internal standard.



**Table S7.** Screening of equivalents of **2a**

$\text{Pd(OAc)}_2$  (10 mol%)  
 $\text{XPhos}$  (20 mol%)  
 $\text{Na}_2\text{CO}_3$  (2.0 equiv)  
 NMP (0.2 M), 110 °C, 24 h

| Entry    | y          | Conversion of <b>1a</b> <sup>[a]</sup> | Yield of <b>3a</b> <sup>[a]</sup> | Yield of <b>BP</b> <sup>[a]</sup> |
|----------|------------|----------------------------------------|-----------------------------------|-----------------------------------|
| 1        | 1.2        | 83                                     | 44                                | 7                                 |
| 2        | 1.5        | 95                                     | 50                                | 7                                 |
| <b>3</b> | <b>2.0</b> | <b>100</b>                             | <b>73</b>                         | <b>7</b>                          |
| 4        | 2.5        | 100                                    | 73                                | 4                                 |
| 5        | 3.0        | 100                                    | 72                                | 5                                 |
| 6        | 3.5        | 100                                    | 65                                | 4                                 |
| 7        | 4.0        | 100                                    | 63                                | 5                                 |

[a] GC yield with *n*-tridecane as an internal standard.

**Table S8.** Screening of the equivalents of base

**1a**, 0.2 mmol      **2a**, 0.4 mmol

| Entry    | z          | Conversion of <b>1a</b> <sup>[a]</sup> | Yield of <b>3a</b> <sup>[a]</sup> | Yield of <b>BP</b> <sup>[a]</sup> |
|----------|------------|----------------------------------------|-----------------------------------|-----------------------------------|
| 1        | 1.2        | 87                                     | 48                                | 5                                 |
| 2        | 1.6        | 94                                     | 54                                | 7                                 |
| <b>3</b> | <b>2.0</b> | <b>100</b>                             | <b>73</b>                         | <b>7</b>                          |
| 4        | 2.4        | 100                                    | 71                                | 3                                 |
| 5        | 2.8        | 100                                    | 46                                | 5                                 |

[a] GC yield with *n*-tridecane as an internal standard.

**Table S9.** Screening of the loading of palladium catalysts

**1a**, 0.2 mmol      **2a**, 0.4 mmol

| Entry    | m           | Conversion of <b>1a</b> <sup>[a]</sup> | Yield of <b>3a</b> <sup>[a]</sup> | Yield of <b>BP</b> <sup>[a]</sup> |
|----------|-------------|----------------------------------------|-----------------------------------|-----------------------------------|
| <b>1</b> | <b>10.0</b> | <b>100</b>                             | <b>73</b>                         | <b>7</b>                          |
| 2        | 5.0         | 45                                     | 30                                | 3                                 |
| 3        | 2.5         | 15                                     | 8                                 | trace                             |

[a] GC yield with *n*-tridecane as an internal standard.

**Table S10.** Screening of the substrate **1**

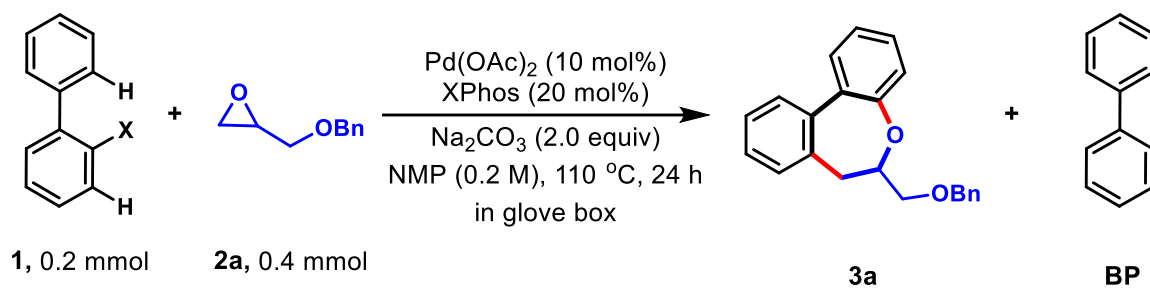

| Entry                   | X         | Conversion of <b>1</b> <sup>[a]</sup> | Yield of <b>3a</b> <sup>[a]</sup> | Yield of <b>BP</b> <sup>[a]</sup> |
|-------------------------|-----------|---------------------------------------|-----------------------------------|-----------------------------------|
| 1                       | Cl        | 23                                    | 12 (10) <sup>[b]</sup>            | 8                                 |
| 2                       | Br        | 99                                    | 83 (80) <sup>[b]</sup>            | 2                                 |
| 3                       | I         | 100                                   | 73 (72) <sup>[b]</sup>            | 7                                 |
| <b>4</b> <sup>[c]</sup> | <b>Br</b> | <b>100</b>                            | <b>85 (84)</b> <sup>[b]</sup>     | <b>2</b>                          |

[a] GC yield with *n*-tridecane as an internal standard. [b] Isolated yield. [c] 28 h.

### 3. Preparation of substrates

2-bromobiphenyls were known compounds and synthesized according to the reported procedure<sup>[1]</sup>.

Epoxides **2n** and **2o** were known compounds and synthesized according to the reported procedure<sup>[2]</sup>. Other epoxides were commercially available and directly used without further purification.

### 4. General procedure for palladium-catalyzed [4+3] annulation of 2-bromobiphenyls and epoxides

To a 4 mL oven-dried Schlenk tube equipped with a magnetic stir bar was charged with palladium acetate (4.4 mg, 0.02 mmol, 10 mol%) and XPhos (19.3 mg, 0.04 mmol, 20 mol%) inside a glove box. Dry NMP (0.3 mL) was added and the solution was pre-stirred at room temperature inside the glovebox for 30 minutes. After that, to this mixture was added sodium carbonate (42.4 mg, 0.4 mmol, 2.0 equiv), 2-bromobiphenyls **1** (0.2 mmol, 1.0 equiv), epoxides **2** (0.4 mmol, 2.0 equiv) and dry NMP (0.7 mL). Then the Schlenk tube was sealed and transferred out of the glovebox. The reaction mixture was heated to 110 °C and stirred for 28 h. After completion of the reaction, the mixture was cooled to room temperature and quenched with H<sub>2</sub>O (10 mL). The mixture was extracted with EtOAc (3 × 10 mL), and the combined organic phase was washed with H<sub>2</sub>O (3 × 20 mL), NaCl (sat. aq., 20 mL), dried over anhydrous Na<sub>2</sub>SO<sub>4</sub> and concentrated under reduced pressure. The residue was directly purified by column chromatography on silica gel or purified by PTLC to give the desired products.

## 5. Characterization data for compounds

### 6-((benzyloxy)methyl)-6,7-dihydrodibenzo[*b,d*]oxepine (3a)

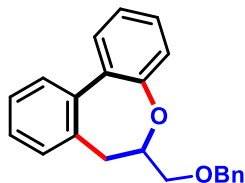

**Physical state:** colorless oil;

**Yield:** 84%;

**R<sub>f</sub>** = 0.3 (silica gel, PE:EtOAc = 20:1);

**<sup>1</sup>H NMR** (400 MHz, CDCl<sub>3</sub>): δ 7.44 – 7.39 (m, 2H), 7.38 – 7.33 (m, 5H), 7.32 – 7.25 (m, 3H), 7.23 – 7.18 (m, 2H), 7.08 (dd, *J* = 7.9, 1.4 Hz, 1H), 4.85 – 4.79 (m, 1H), 4.62 (d, *J* = 12.0 Hz, 1H), 4.56 (d, *J* = 12.0 Hz, 1H), 3.72 (dd, *J* = 9.7, 5.9 Hz, 1H), 3.53 (dd, *J* = 9.7, 6.3 Hz, 1H), 2.85 (dd, *J* = 14.2, 5.2 Hz, 1H), 2.71 (dd, *J* = 14.2, 6.9 Hz, 1H);

**<sup>13</sup>C NMR** (100 MHz, CDCl<sub>3</sub>): δ 153.4, 138.8, 138.3, 136.0, 135.1, 129.3, 129.1, 129.0, 128.6, 128.1, 128.0, 127.9, 127.7, 127.5, 124.7, 123.4, 86.9, 73.6, 71.2, 35.1;

**HRMS (ESI-TOF):** calc'd for C<sub>20</sub>H<sub>20</sub>NaO<sub>2</sub><sup>+</sup> [M+Na<sup>+</sup>] 299.1406, found 299.1400.

### 6-(phenoxymethyl)-6,7-dihydrodibenzo[*b,d*]oxepine (3b)

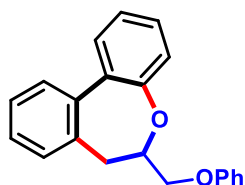

**Physical state:** colorless oil;

**Yield:** 86%;

**R<sub>f</sub>** = 0.3 (silica gel, PE:EtOAc = 20:1);

**<sup>1</sup>H NMR** (400 MHz, CDCl<sub>3</sub>): δ 7.51 – 7.42 (m, 2H), 7.41 – 7.36 (m, 1H), 7.33 – 7.23 (m, 6H), 7.13 (dd, *J* = 7.8, 1.4 Hz, 1H), 6.99 – 6.94 (m, 3H), 5.03 – 4.97 (m, 1H), 4.22 (dd, *J* = 9.5, 5.5 Hz, 1H), 4.02 (dd, *J* = 9.5, 6.4 Hz, 1H), 2.96 (dd, *J* = 14.3, 5.2 Hz, 1H), 2.87 (dd, *J* = 14.3, 6.9 Hz, 1H);

**<sup>13</sup>C NMR** (100 MHz, CDCl<sub>3</sub>): δ 158.8, 153.3, 138.8, 135.7, 135.1, 129.7, 129.4, 129.2, 129.1, 128.2, 127.9, 127.7, 125.0, 123.4, 121.3, 114.9, 86.2, 68.6, 35.0;

**HRMS** (ESI-TOF): calc'd for  $C_{21}H_{18}NaO_2^+$  [ $M+Na^+$ ] 325.1199, found 325.1194.

**6-(methoxymethyl)-6,7-dihydrodibenzo[*b,d*]oxepine (3c)**

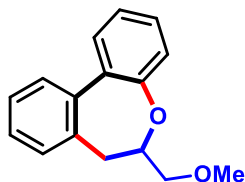

**Physical state:** colorless oil;

**Yield:** 89%;

$R_f$  = 0.3 (silica gel, PE:EtOAc = 20:1);

**$^1H$  NMR** (400 MHz,  $CDCl_3$ ):  $\delta$  7.46 – 7.36 (m, 3H), 7.34 – 7.29 (m, 2H), 7.27 – 7.21 (m, 2H), 7.13 (dd,  $J$  = 7.9, 1.4 Hz, 1H), 4.83 – 4.77 (m, 1H), 3.65 (dd,  $J$  = 9.8, 6.5 Hz, 1H), 3.49 – 3.45 (m, 1H), 3.44 (s, 3H), 2.85 (dd,  $J$  = 14.2, 5.3 Hz, 1H), 2.68 (dd,  $J$  = 14.2, 6.8 Hz, 1H);

**$^{13}C$  NMR** (100 MHz,  $CDCl_3$ ):  $\delta$  153.4, 138.8, 136.0, 135.2, 129.3, 129.0, 128.2, 127.8, 127.6, 124.8, 123.4, 86.7, 73.9, 59.4, 35.1;

**HRMS** (ESI-TOF): calc'd for  $C_{16}H_{16}NaO_2^+$  [ $M+Na^+$ ] 263.1043, found 263.1039.

**(6,7-dihydrodibenzo[*b,d*]oxepin-6-yl)methyl butyrate (3d)**

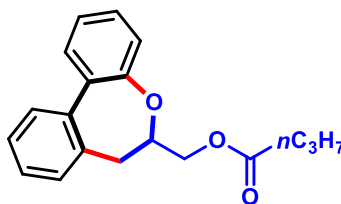

**Physical state:** colorless oil;

**Yield:** 73%;

$R_f$  = 0.2 (silica gel, PE:EtOAc = 20:1);

**$^1H$  NMR** (400 MHz,  $CDCl_3$ ): 7.50 – 7.37 (m, 3H), 7.35 – 7.30 (m, 2H), 7.28 – 7.23 (m, 2H), 7.13 (dd,  $J$  = 7.9, 1.4 Hz, 1H), 4.88 – 4.82 (m, 1H), 4.33 (dd,  $J$  = 11.5, 6.8 Hz, 1H), 4.23 (dd,  $J$  = 11.5, 4.7 Hz, 1H), 2.83 (dd,  $J$  = 14.2, 5.1 Hz, 1H), 2.69 (dd,  $J$  = 14.2, 8.1 Hz, 1H), 2.36 (t,  $J$  = 7.4 Hz, 2H), 1.73 – 1.64 (m, 2H), 0.98 (t,  $J$  = 7.4 Hz, 3H);

**$^{13}C$  NMR** (100 MHz,  $CDCl_3$ ):  $\delta$  173.7, 152.9, 138.7, 135.5, 135.1, 129.4, 129.1, 128.9,

128.2, 127.9, 127.8, 125.0, 123.6, 85.8, 65.0, 36.3, 35.0, 18.6, 13.9;

**HRMS** (ESI-TOF): calc'd for  $C_{19}H_{20}NaO_3^+$  [ $M+Na^+$ ] 319.1305, found 319.1302.

#### 4-((6,7-dihydrodibenzo[*b,d*]oxepin-6-yl)methoxy)-9H-carbazole (3e)

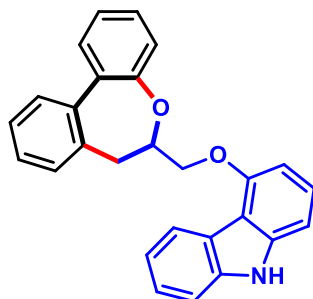

**Physical state:** colorless oil;

**Yield:** 45%;

$R_f$  = 0.2 (silica gel, PE:EtOAc = 2:1);

**$^1H$  NMR** (400 MHz,  $CDCl_3$ ):  $\delta$  8.11 (d,  $J$  = 7.9 Hz, 1H), 8.04 (s, 1H), 7.51 – 7.48 (m, 2H), 7.43 – 7.36 (m, 3H), 7.34 – 7.30 (m, 3H), 7.27 – 7.24 (m, 2H), 7.19 – 7.12 (m, 2H), 7.06 (d,  $J$  = 8.1 Hz, 1H), 6.68 (d,  $J$  = 8.0 Hz, 1H), 5.26 – 5.20 (m, 1H), 4.45 (dd,  $J$  = 9.6, 5.2 Hz, 1H), 4.37 (dd,  $J$  = 9.6, 5.8 Hz, 1H), 3.16 (dd,  $J$  = 14.3, 7.8 Hz, 1H), 3.02 (dd,  $J$  = 14.3, 5.0 Hz, 1H);

**$^{13}C$  NMR** (100 MHz,  $CDCl_3$ ):  $\delta$  155.3, 153.4, 141.1, 138.9, 135.9, 135.0, 129.4, 129.2, 128.3, 127.9, 127.8, 126.8, 125.2, 125.0, 123.7, 123.4, 122.7, 120.0, 113.0, 110.1, 104.0, 101.3, 86.5, 69.0, 35.2;

**HRMS** (ESI-TOF): calc'd for  $C_{27}H_{21}NaO_2^+$  [ $M+Na^+$ ] 400.1434, found 400.1432.

#### (6,7-dihydrodibenzo[*b,d*]oxepin-6-yl)methanol (3f)

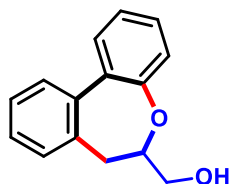

**Physical state:** colorless oil;

**Yield:** 70%;

$R_f$  = 0.3 (silica gel, PE:EtOAc = 2:1);

**<sup>1</sup>H NMR** (400 MHz, CDCl<sub>3</sub>): δ 7.47 – 7.43 (m, 2H), 7.41 – 7.37 (m, 1H), 7.35 – 7.29 (m, 2H), 7.28 – 7.23 (m, 2H), 7.12 (dd, *J* = 7.9, 1.4 Hz, 1H), 4.76 – 4.70 (m, 1H), 3.85 (dd, *J* = 11.4, 8.2 Hz, 1H), 3.68 (dd, *J* = 11.5, 3.8 Hz, 1H), 2.84 (dd, *J* = 14.3, 5.4 Hz, 1H), 2.63 (dd, *J* = 14.3, 6.8 Hz, 1H), 2.04 (s, 1H);

**<sup>13</sup>C NMR** (100 MHz, CDCl<sub>3</sub>): δ 153.0, 138.6, 135.9, 135.2, 129.5, 129.2, 129.0, 128.2, 127.9, 127.7, 125.0, 123.1, 89.0, 64.7, 34.7;

**HRMS** (ESI-TOF): calc'd for C<sub>15</sub>H<sub>14</sub>NaO<sub>2</sub><sup>+</sup> [M+Na<sup>+</sup>] 249.0886, found 249.0883.

### 2-((6,7-dihydrodibenzo[*b,d*]oxepin-6-yl)methyl)isoindoline-1,3-dione (3g)

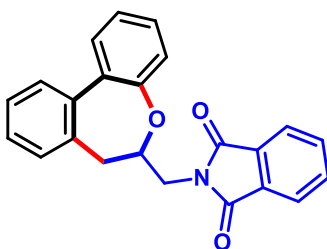

**Physical state:** colorless oil;

**Yield:** 39%;

*R<sub>f</sub>* = 0.2 (silica gel, PE:EtOAc = 5:1);

**<sup>1</sup>H NMR** (400 MHz, CDCl<sub>3</sub>): δ 7.92 – 7.87 (m, 2H), 7.76 – 7.74 (m, 2H), 7.47 – 7.31 (m, 7H), 7.28 – 7.24 (m, 1H), 5.04 – 4.97 (m, 1H), 4.14 (dd, *J* = 14.0, 7.9 Hz, 1H), 3.73 (dd, *J* = 14.0, 4.5 Hz, 1H), 2.86 (dd, *J* = 14.2, 4.7 Hz, 1H), 2.72 (dd, *J* = 14.2, 8.8 Hz, 1H);

**<sup>13</sup>C NMR** (100 MHz, CDCl<sub>3</sub>): δ 168.6, 152.5, 138.8, 135.5, 135.0, 134.3, 132.3, 129.4, 129.3, 129.1, 128.1, 127.9, 127.8, 125.0, 123.9, 123.6, 85.5, 41.3, 35.9;

**HRMS** (ESI-TOF): calc'd for C<sub>23</sub>H<sub>17</sub>NNaO<sub>3</sub><sup>+</sup> [M+Na<sup>+</sup>] 378.1101, found 378.1105.

### 6,7-dihydrodibenzo[*b,d*]oxapine (3h)

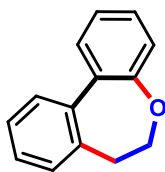

**Physical state:** colorless oil;

**Yield:** 86%;



$R_f = 0.3$  (silica gel, PE:EtOAc = 20:1);

$^1\text{H NMR}$  (400 MHz,  $\text{CDCl}_3$ ):  $\delta$  7.46 – 7.36 (m, 3H), 7.34 – 7.21 (m, 4H), 7.14 (d,  $J = 7.9$  Hz, 1H), 4.57 (t,  $J = 6.4$  Hz, 2H), 2.80 (t,  $J = 6.4$  Hz, 2H);

$^{13}\text{C NMR}$  (100 MHz,  $\text{CDCl}_3$ ):  $\delta$  154.5, 139.1, 137.6, 135.4, 129.4, 129.2, 128.3, 128.2, 127.9, 127.5, 124.7, 122.5, 78.6, 33.6;

**HRMS** (ESI-TOF): calc'd for  $\text{C}_{14}\text{H}_{12}\text{NaO}^+$  [ $\text{M}+\text{Na}^+$ ] 219.0780, found 219.0766.

### 6-methyl-6,7-dihydrobibenzo[*b,d*]oxapine (3i)

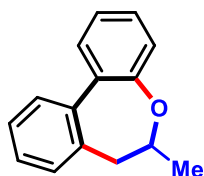

**Physical state:** colorless oil;

**Yield:** 76%;

$R_f = 0.3$  (silica gel, PE:EtOAc = 20:1);

$^1\text{H NMR}$  (400 MHz,  $\text{CDCl}_3$ ):  $\delta$  7.47 – 7.42 (m, 2H), 7.39 – 7.36 (m, 1H), 7.33 – 7.29 (m, 2H), 7.27 – 7.21 (m, 2H), 7.10 (d,  $J = 7.8$  Hz, 1H), 4.87 – 4.79 (m, 1H), 2.84 (dd,  $J = 14.0, 5.2$  Hz, 1H), 2.52 (dd,  $J = 14.0, 6.9$  Hz, 1H), 1.38 (d,  $J = 6.3$  Hz, 3H);

$^{13}\text{C NMR}$  (100 MHz,  $\text{CDCl}_3$ ):  $\delta$  153.6, 138.9, 136.6, 135.5, 129.2, 129.0, 128.9, 128.1, 127.6, 127.4, 124.6, 123.5, 84.9, 39.8, 20.5;

**HRMS** (ESI-TOF): calc'd for  $\text{C}_{15}\text{H}_{14}\text{NaO}^+$  [ $\text{M}+\text{Na}^+$ ] 233.0936, found 233.0930.

### 6-butyl-6,7-dihydrobibenzo[*b,d*]oxapine (3j)

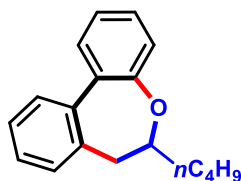

**Physical state:** colorless oil;

**Yield:** 76%;

$R_f = 0.3$  (silica gel, PE:EtOAc = 20:1);

$^1\text{H NMR}$  (400 MHz,  $\text{CDCl}_3$ ):  $\delta$  7.47 – 7.42 (m, 2H), 7.40 – 7.36 (m, 1H), 7.34 – 7.29 (m, 2H), 7.25 – 7.21 (m, 2H), 7.09 (d,  $J = 7.8$  Hz, 1H), 4.65 – 4.59 (m, 1H), 2.81 (dd,  $J = 14.1, 5.1$  Hz, 1H), 2.57 (dd,  $J = 14.1, 7.6$  Hz, 1H), 1.85 – 1.77 (m, 1H), 1.64 – 1.32 (m, 5H), 0.96 (t,  $J = 7.2$  Hz, 3H);

$^{13}\text{C}$  NMR (100 MHz,  $\text{CDCl}_3$ ):  $\delta$  153.6, 138.9, 136.9, 135.6, 129.2, 128.9, 128.9, 128.1, 127.6, 127.4, 124.5, 123.6, 89.2, 38.4, 34.3, 28.4, 22.8, 14.3;

HRMS (ESI-TOF): calc'd for  $\text{C}_{18}\text{H}_{20}\text{NaO}^+$  [ $\text{M}+\text{Na}^+$ ] 275.1406, found 275.1402.

### 6-decyl-6,7-dihydrobibenzo[*b,d*]oxapine (3k)

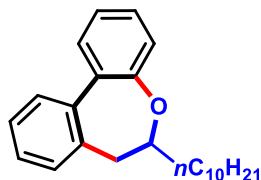

**Physical state:** colorless oil;

**Yield:** 67%;

$R_f$  = 0.4 (silica gel, PE:EtOAc = 20:1);

$^1\text{H}$  NMR (400 MHz,  $\text{CDCl}_3$ ):  $\delta$  7.46 – 7.41 (m, 2H), 7.39 – 7.35 (m, 1H), 7.33 – 7.28 (m, 2H), 7.25 – 7.18 (m, 2H), 7.08 (d,  $J$  = 7.8 Hz, 1H), 4.64 – 4.58 (m, 1H), 2.79 (dd,  $J$  = 14.1, 5.1 Hz, 1H), 2.56 (dd,  $J$  = 14.1, 7.6 Hz, 1H), 1.84 – 1.75 (m, 1H), 1.61 – 1.38 (m, 4H), 1.35 – 1.26 (m, 13H), 0.89 (t,  $J$  = 6.7 Hz, 3H);

$^{13}\text{C}$  NMR (100 MHz,  $\text{CDCl}_3$ ):  $\delta$  153.6, 138.9, 136.9, 135.6, 129.2, 128.9, 128.9, 128.1, 127.6, 127.4, 124.5, 123.6, 89.2, 38.4, 34.6, 32.1, 29.8, 29.8, 29.5, 26.2, 22.9, 14.3;

HRMS (ESI-TOF): calc'd for  $\text{C}_{24}\text{H}_{32}\text{NaO}^+$  [ $\text{M}+\text{Na}^+$ ] 359.2345, found 359.2340.

### 6-hexadecyl-6,7-dihydrobibenzo[*b,d*]oxapine (3l)

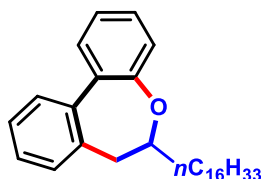

**Physical state:** colorless oil;

**Yield:** 63%;

$R_f$  = 0.5 (silica gel, PE:EtOAc = 20:1);

$^1\text{H}$  NMR (400 MHz,  $\text{CDCl}_3$ ):  $\delta$  7.46 – 7.41 (m, 2H), 7.38 – 7.34 (m, 1H), 7.33 – 7.27 (m, 2H), 7.25 – 7.19 (m, 2H), 7.09 – 7.06 (m, 1H), 4.64 – 4.58 (m, 1H), 2.79 (dd,  $J$  = 14.1, 5.1 Hz, 1H), 2.56 (dd,  $J$  = 14.1, 7.6 Hz, 1H), 1.84 – 1.75 (m, 1H), 1.65 – 1.40 (m,

4H), 1.35 – 1.22 (m, 25H), 0.88 (t,  $J = 6.8$  Hz, 3H);

$^{13}\text{C}$  NMR (100 MHz,  $\text{CDCl}_3$ ):  $\delta$  153.6, 138.9, 136.9, 135.6, 129.2, 128.9, 128.9, 128.1, 127.6, 127.4, 124.5, 123.6, 89.2, 38.4, 34.6, 32.1, 29.9, 29.9, 29.8, 29.8, 29.8, 29.6, 26.2, 22.9, 14.3;

HRMS (ESI-TOF): calc'd for  $\text{C}_{30}\text{H}_{44}\text{NaO}^+$  [ $\text{M}+\text{Na}^+$ ] 443.3284, found 443.3300.

### 6,6-dimethyl-6,7-dihydrobenzo[*b,d*]oxapine (3m)

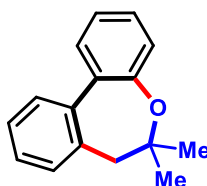

**Physical state:** colorless oil;

**Yield:** 25%;

$R_f = 0.3$  (silica gel, PE:EtOAc = 20:1);

$^1\text{H}$  NMR (400 MHz,  $\text{CDCl}_3$ ):  $\delta$  7.48 – 7.44 (m, 2H), 7.40 – 7.36 (m, 1H), 7.33 – 7.29 (m, 2H), 7.25 – 7.21 (m, 2H), 7.06 (dd,  $J = 7.8, 1.1$  Hz, 1H), 2.61 (s, 2H), 1.41 (s, 6H);

$^{13}\text{C}$  NMR (100 MHz,  $\text{CDCl}_3$ ):  $\delta$  138.9, 129.6, 129.2, 128.8, 128.2, 127.5, 127.4, 124.6, 124.3, 89.4, 44.8, 26.9;

HRMS (ESI-TOF): calc'd for  $\text{C}_{16}\text{H}_{16}\text{NaO}^+$  [ $\text{M}+\text{Na}^+$ ] 247.1093, found 247.1095.

### (8*R*,9*S*,13*S*,14*S*)-3-(((*R*)-6,7-dihydrodibenzo[*b,d*]oxepin-6-yl)methoxy)-13-methyl-6,7,8,9,11,12,13,14,15,16-decahydro-17*H*-cyclopenta[*a*]phenanthren-17-one (3n)

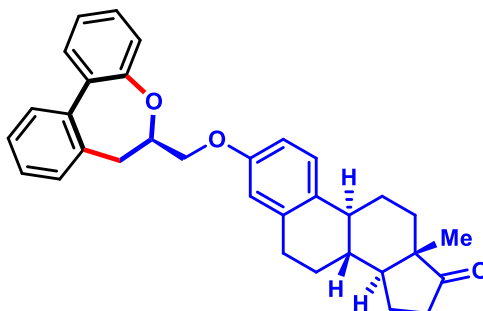

**Physical state:** colorless oil;

**Yield:** 70%;

**R<sub>f</sub>** = 0.2 (silica gel, PE:EtOAc = 10:1);

**<sup>1</sup>H NMR** (400 MHz, CDCl<sub>3</sub>): δ 7.47 – 7.36 (m, 3H), 7.33 – 7.19 (m, 5H), 7.12 (d, *J* = 7.8 Hz, 1H), 6.77 – 6.69 (m, 2H), 5.00 – 4.94 (m, 1H), 4.18 (dd, *J* = 9.5, 5.6 Hz, 1H), 3.98 (dd, *J* = 9.5, 6.6 Hz, 1H), 2.96 – 2.82 (m, 4H), 2.49 (dd, *J* = 18.8, 8.6 Hz, 1H), 2.42 – 2.34 (m, 1H), 2.28 – 2.22 (m, 1H), 2.17 – 1.92 (m, 4H), 1.69 – 1.40 (m, 6H), 0.90 (s, 3H);

**<sup>13</sup>C NMR** (100 MHz, CDCl<sub>3</sub>): δ 221.1 156.8, 153.2, 138.8, 138.0, 135.7, 135.1, 132.6, 129.4, 129.2, 129.1, 128.2, 127.8, 127.7, 126.6, 124.9, 123.4, 114.9, 112.4, 86.2, 68.6, 50.6, 48.2, 44.2, 38.5, 36.0, 35.0, 31.7, 29.8, 26.7, 26.1, 21.8, 14.0;

**HRMS** (ESI-TOF): calc'd for C<sub>33</sub>H<sub>34</sub>NaO<sub>3</sub><sup>+</sup> [*M*+Na<sup>+</sup>] 501.2400, found 501.2406.

**((*S*)-6,7-dihydrodibenzo[*b,d*]oxepin-6-yl)methyl** **(*R*)-4-**  
**((3*R*,5*R*,8*R*,9*S*,10*S*,13*R*,14*S*,17*R*)-3-hydroxy-10,13-dimethylhexadecahydro-1*H*-**  
**cyclopenta[*a*]phenanthren-17-yl)pentanoate (3o)**

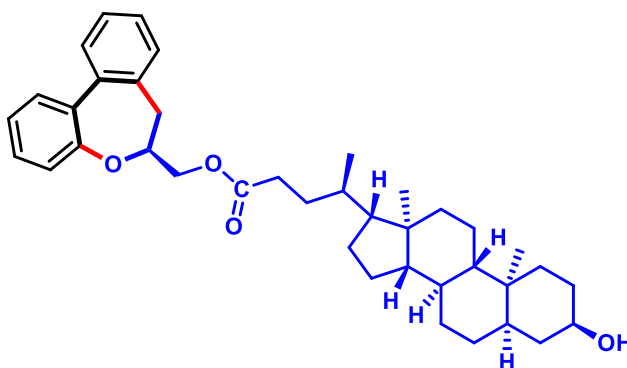

**Physical state:** colorless oil;

**Yield:** 33%;

**R<sub>f</sub>** = 0.2 (silica gel, PE:EtOAc = 2:1);

**<sup>1</sup>H NMR** (400 MHz, CDCl<sub>3</sub>): δ 7.47 – 7.37 (m, 3H), 7.35 – 7.30 (m, 2H), 7.25 – 7.23 (m, 2H), 7.12 (d, *J* = 7.2 Hz, 1H), 4.87 – 4.81 (m, 1H), 4.32 (dd, *J* = 11.6, 6.6 Hz, 1H), 4.21 (dd, *J* = 11.6, 4.8 Hz, 1H), 3.66 – 3.59 (m, 1H), 2.83 (dd, *J* = 14.2, 5.1 Hz, 1H), 2.69 (dd, *J* = 14.2, 8.2 Hz, 1H), 2.45 – 2.37 (m, 1H), 2.32 – 2.24 (m, 1H), 1.97 – 1.93 (m, 1H), 1.88 – 1.67 (m, 6H), 1.49 – 1.31 (m, 10H), 1.27 – 1.21 (m, 4H), 1.17 – 1.00 (m, 6H), 0.92 (d, *J* = 7.5 Hz, 6H), 0.64 (s, 3H);

$^{13}\text{C}$  NMR (100 MHz,  $\text{CDCl}_3$ ):  $\delta$  174.4, 152.9, 138.7, 135.6, 135.1, 129.4, 129.2, 128.9, 128.2, 127.9, 127.8, 125.0, 123.6, 85.9, 72.1, 65.0, 56.7, 56.1, 42.9, 42.3, 40.6, 40.4, 36.6, 36.0, 35.6, 35.5, 35.0, 34.8, 31.4, 31.2, 30.7, 28.4, 27.4, 26.6, 24.4, 23.6, 21.0, 18.5, 12.2;

HRMS (ESI-TOF): calc'd for  $\text{C}_{39}\text{H}_{52}\text{NaO}_4^+$  [ $\text{M}+\text{Na}^+$ ] 584.3866, found 584.3869.

### 6-((benzyloxy)methyl)-3,9-dimethyl-6,7-dihydrodibenzo[*b,d*]oxepine (3p)

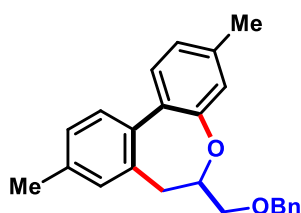

**Physical state:** colorless oil;

**Yield:** 72%;

$R_f$  = 0.3 (silica gel, PE:EtOAc = 20:1);

$^1\text{H}$  NMR (400 MHz,  $\text{CDCl}_3$ ):  $\delta$  7.45 – 7.40 (m, 4H), 7.38 – 7.35 (m, 2H), 7.32 (d,  $J$  = 7.8 Hz, 1H), 7.21 (d,  $J$  = 7.7 Hz, 1H), 7.06 (d,  $J$  = 6.6 Hz, 2H), 6.94 (s, 1H), 4.87 – 4.81 (m, 1H), 4.68 (d,  $J$  = 12.1 Hz, 1H), 4.63 (d,  $J$  = 12.1 Hz, 1H), 3.77 (dd,  $J$  = 9.7, 5.9 Hz, 1H), 3.58 (dd,  $J$  = 9.7, 6.2 Hz, 1H), 2.85 (dd,  $J$  = 14.2, 5.2 Hz, 1H), 2.72 (dd,  $J$  = 14.2, 7.0 Hz, 1H), 2.41 (s, 3H), 2.39 (s, 3H);  $^{13}\text{C}$  NMR (100 MHz,  $\text{CDCl}_3$ ):  $\delta$  153.2, 138.9, 138.3, 137.2, 135.9, 135.8, 132.0, 129.8, 128.8, 128.6, 128.2, 128.1, 127.9, 127.8, 125.4, 123.9, 86.7, 73.6, 71.3, 35.2, 21.3, 21.3;

HRMS (ESI-TOF): calc'd for  $\text{C}_{24}\text{H}_{24}\text{NaO}_2^+$  [ $\text{M}+\text{Na}^+$ ] 367.1669, found 367.1672.

### 6-((benzyloxy)methyl)-3,9-dimethoxy-6,7-dihydrodibenzo[*b,d*]oxepine (3q)

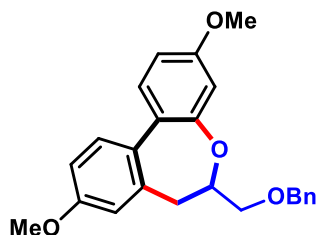

**Physical state:** colorless oil;

**Yield:** 73%;

$R_f = 0.3$  (silica gel, PE:EtOAc = 20:1);

$^1\text{H NMR}$  (400 MHz,  $\text{CDCl}_3$ ):  $\delta$  7.41 – 7.37 (m, 4H), 7.35 – 7.29 (m, 3H), 6.92 (dd,  $J = 8.4, 2.6$  Hz, 1H), 6.81 – 6.79 (m, 2H), 6.70 (d,  $J = 2.5$  Hz, 1H), 4.87 – 4.81 (m, 1H), 4.66 (d,  $J = 12.0$  Hz, 1H), 4.61 (d,  $J = 12.1$  Hz, 1H), 3.84 (s, 3H), 3.82 (s, 3H), 3.76 (dd,  $J = 9.7, 6.0$  Hz, 1H), 3.57 (dd,  $J = 9.7, 6.2$  Hz, 1H), 2.87 (dd,  $J = 14.2, 5.1$  Hz, 1H), 2.73 (dd,  $J = 14.2, 6.9$  Hz, 1H);

$^{13}\text{C NMR}$  (100 MHz,  $\text{CDCl}_3$ ):  $\delta$  160.0, 158.9, 154.1, 138.3, 137.1, 131.2, 129.4, 128.8, 128.6, 127.9, 127.9, 127.1, 114.9, 112.6, 110.7, 108.7, 86.5, 73.6, 71.5, 55.6, 55.5, 35.5;

**HRMS** (ESI-TOF): calc'd for  $\text{C}_{24}\text{H}_{24}\text{NaO}_4^+$  [ $\text{M}+\text{Na}^+$ ] 399.1567, found 399.1566.

### 6-((benzyloxy)methyl)-2,10-dimethyl-6,7-dihydrodibenzo[*b,d*]oxepine (3r)

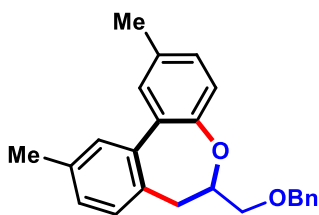

**Physical state:** colorless oil;

**Yield:** 82%;

$R_f = 0.3$  (silica gel, PE:EtOAc = 20:1);

$^1\text{H NMR}$  (400 MHz,  $\text{CDCl}_3$ ):  $\delta$  7.38 – 7.28 (m, 5H), 7.25 – 7.19 (m, 2H), 7.09 – 7.06 (m, 3H), 6.96 (d,  $J = 8.0$  Hz, 1H), 4.79 – 4.73 (m, 1H), 4.62 (d,  $J = 12.0$  Hz, 1H), 4.56 (d,  $J = 12.0$  Hz, 1H), 3.70 (dd,  $J = 9.7, 6.0$  Hz, 1H), 3.50 (dd,  $J = 9.7, 6.3$  Hz, 1H), 2.80 (dd,  $J = 14.2, 5.3$  Hz, 1H), 2.65 (dd,  $J = 14.2, 6.9$  Hz, 1H), 2.39 (s, 3H), 2.37 (s, 3H).;  $^{13}\text{C NMR}$  (100 MHz,  $\text{CDCl}_3$ ):  $\delta$  151.2, 138.8, 138.4, 137.1, 135.0, 134.1, 133.1, 129.8, 129.5, 129.1, 128.8, 128.7, 128.4, 128.1, 128.0, 123.1, 86.7, 73.7, 71.2, 34.8, 21.4, 21.1;

**HRMS** (ESI-TOF): calc'd for  $\text{C}_{24}\text{H}_{24}\text{NaO}_2^+$  [ $\text{M}+\text{Na}^+$ ] 367.1669, found 367.1670.

**6-((benzyloxy)methyl)-3,9-bis(trifluoromethoxy)-6,7-dihydrodibenzo[*b,d*]oxepine (3s)**

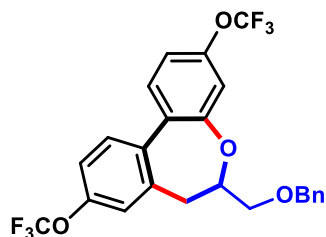

**Physical state:** colorless oil;

**Yield:** 51%;

$R_f$  = 0.3 (silica gel, PE:EtOAc = 20:1);

**$^1\text{H NMR}$**  (400 MHz,  $\text{CDCl}_3$ ):  $\delta$  7.45 – 7.21 (m, 7H), 7.24 – 7.21 (m, 1H), 7.13 – 7.07 (m, 2H), 7.03 – 6.98 (m, 1H), 4.90 – 4.80 (m, 1H), 4.66 – 4.54 (m, 2H), 3.73 – 3.66 (m, 1H), 3.59 – 3.50 (m, 1H), 2.90 – 2.74 (m, 2H);

**$^{13}\text{C NMR}$**  (100 MHz,  $\text{CDCl}_3$ ):  $\delta$  154.3, 149.7 (q,  $J$  = 1.8 Hz), 148.8 (q,  $J$  = 1.9 Hz), 137.9, 136.3, 132.4, 130.0, 129.5, 128.7, 128.1, 128.1, 121.7, 120.7 (q,  $J$  = 258.6 Hz), 120.6 (q,  $J$  = 259.6 Hz), 120.0, 117.2, 116.3, 87.2, 73.7, 70.9, 34.9;

**$^{19}\text{F NMR}$**  (376 MHz,  $\text{CDCl}_3$ ):  $\delta$  -57.7, -57.8;

**HRMS** (ESI-TOF): calc'd for  $\text{C}_{24}\text{H}_{18}\text{F}_6\text{NaO}_4^+$  [ $\text{M}+\text{Na}^+$ ] 507.1001, found 507.0999.

**6-((benzyloxy)methyl)-3,9-bis(trifluoromethyl)-6,7-dihydrodibenzo[*b,d*]oxepine (3t)**

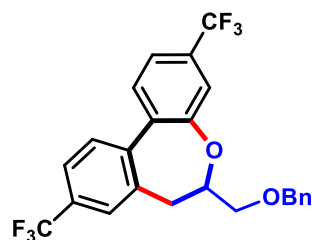

**Physical state:** colorless oil;

**Yield:** 39%;

$R_f$  = 0.3 (silica gel, PE:EtOAc = 20:1);

**$^1\text{H NMR}$**  (400 MHz,  $\text{CDCl}_3$ ):  $\delta$  7.66 (dd,  $J$  = 8.0, 1.9 Hz, 1H), 7.56 – 7.50 (m, 4H), 7.41 – 7.31 (m, 6H), 4.91 – 4.85 (m, 1H), 4.63 (d,  $J$  = 12.0 Hz, 1H), 4.59 (d,  $J$  = 12.0 Hz, 1H), 3.72 (dd,  $J$  = 9.8, 5.5 Hz, 1H), 3.58 (dd,  $J$  = 9.8, 6.0 Hz, 1H), 2.95 – 2.84 (m,

1H);

<sup>13</sup>C NMR (100 MHz, CDCl<sub>3</sub>): δ 153.9, 141.1, 137.9, 137.3, 137.1, 132.1 (q, *J* = 32.7 Hz), 130.6 (q, *J* = 32.4 Hz), 129.9, 128.7, 128.2, 128.1, 128.0, 126.1 (q, *J* = 3.8 Hz), 125.4 (q, *J* = 36.0 Hz), 124.7 (q, *J* = 4.0 Hz), 122.7 (q, *J* = 36.0 Hz), 121.6 (q, *J* = 3.9 Hz), 120.9 (q, *J* = 3.7 Hz), 87.6, 73.8, 71.0, 34.8;

<sup>19</sup>F NMR (376 MHz, CDCl<sub>3</sub>): δ -62.4, -62.5;

HRMS (ESI-TOF): calc'd for C<sub>24</sub>H<sub>18</sub>F<sub>6</sub>NaO<sub>2</sub><sup>+</sup> [M+Na<sup>+</sup>] 475.1103, found 475.1101.

### 6-((benzyloxy)methyl)-3,9-difluoro-6,7-dihydrodibenzo[*b,d*]oxepine (3u)

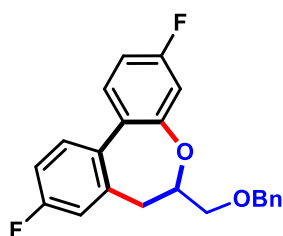

**Physical state:** colorless oil;

**Yield:** 50%;

*R<sub>f</sub>* = 0.3 (silica gel, PE:EtOAc = 20:1);

<sup>1</sup>H NMR (400 MHz, CDCl<sub>3</sub>): δ 7.42 – 7.30 (m, 7H), 7.06 (td, *J* = 8.5, 2.6 Hz, 1H), 6.97 – 6.91 (m, 2H), 6.83 (dd, *J* = 9.5, 2.6 Hz, 1H), 4.85 – 4.79 (m, 1H), 4.63 (d, *J* = 12.0 Hz, 1H), 4.58 (d, *J* = 12.0 Hz, 1H), 3.71 (dd, *J* = 9.7, 5.8 Hz, 1H), 3.54 (dd, *J* = 9.7, 6.2 Hz, 1H), 2.83 (dd, *J* = 14.3, 5.1 Hz, 1H), 2.74 (dd, *J* = 14.3, 6.8 Hz, 1H);

<sup>13</sup>C NMR (100 MHz, CDCl<sub>3</sub>): δ 163.8 (d, *J* = 69.1 Hz), 161.4 (d, *J* = 68.2 Hz), 154.3 (d, *J* = 11.1 Hz), 138.0, 137.9 (d, *J* = 7.7 Hz), 134.0 (d, *J* = 3.2 Hz), 130.2 (d, *J* = 3.5 Hz), 129.9 (d, *J* = 9.6 Hz), 129.6 (d, *J* = 8.4 Hz), 128.7, 128.1, 116.1 (d, *J* = 21.6 Hz), 114.4 (d, *J* = 21.2 Hz), 111.9 (d, *J* = 21.2 Hz), 110.9 (d, *J* = 22.2 Hz), 86.9, 73.7, 70.9, 35.0;

<sup>19</sup>F NMR (376 MHz, CDCl<sub>3</sub>): δ -112.8, -115.0;

HRMS (ESI-TOF): calc'd for C<sub>22</sub>H<sub>18</sub>F<sub>2</sub>NaO<sub>2</sub><sup>+</sup> [M+Na<sup>+</sup>] 375.1167, found 375.1162.



**6-((benzyloxy)methyl)-2,10-dichloro-6,7-dihydrodibenzo[*b,d*]oxepine (3v)**

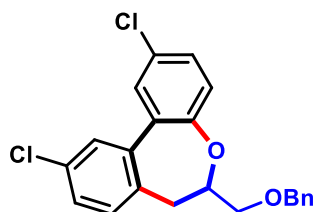

**Physical state:** colorless oil;

**Yield:** 35%;

$R_f$  = 0.3 (silica gel, PE:EtOAc = 20:1);

**$^1\text{H}$  NMR** (400 MHz,  $\text{CDCl}_3$ ):  $\delta$  7.40 – 7.30 (m, 7H), 7.28 – 7.25 (m, 2H), 7.11 (d,  $J$  = 8.1 Hz, 1H), 7.01 (d,  $J$  = 8.5 Hz, 1H), 4.81 – 4.75 (m, 1H), 4.61 (d,  $J$  = 12.0 Hz, 1H), 4.56 (d,  $J$  = 12.0 Hz, 1H), 3.68 (dd,  $J$  = 9.7, 5.8 Hz, 1H), 3.51 (dd,  $J$  = 9.7, 6.2 Hz, 1H), 2.81 (dd,  $J$  = 14.4, 5.2 Hz, 1H), 2.71 (dd,  $J$  = 14.4, 6.8 Hz, 1H);

**$^{13}\text{C}$  NMR** (100 MHz,  $\text{CDCl}_3$ ):  $\delta$  152.1, 139.2, 138.0, 135.4, 134.5, 133.4, 130.6, 130.0, 129.4, 128.9, 128.7, 128.1, 128.1, 128.1, 128.0, 124.9, 87.0, 73.7, 70.8, 34.3;

**HRMS** (ESI-TOF): calc'd for  $\text{C}_{22}\text{H}_{18}\text{Cl}_2\text{NaO}_2^+$  [ $\text{M}+\text{Na}^+$ ] 407.0576, found 407.0577.

**6-((benzyloxy)methyl)-3-methyl-6,7-dihydrodibenzo[*b,d*]oxepine (3w) and 6-((benzyloxy)methyl)-9-methyl-6,7-dihydrodibenzo[*b,d*]oxepine (3w')**

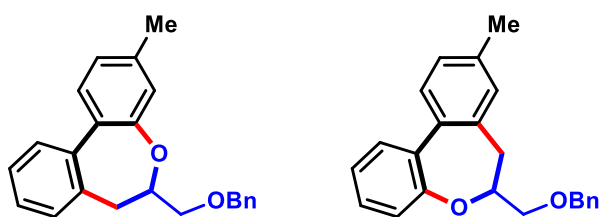

**Physical state:** colorless oil;

**Yield:** 75%, **3w** : **3w'** = 1:1;

$R_f$  = 0.3 (silica gel, PE:EtOAc = 20:1);

**$^1\text{H}$  NMR** (400 MHz,  $\text{CDCl}_3$ ) (mixture):  $\delta$  7.43 – 7.16 (m, 10H), 7.10 – 7.07 (m, 0.5H), 7.05 – 7.03 (m, 0.5H), 7.02 – 7.01 (m, 0.5H), 6.92 – 6.90 (m, 0.5H), 4.84 – 4.78 (m, 1H), 4.67 – 4.55 (m, 2H), 3.76 – 3.70 (m, 1H), 3.57 – 3.50 (m, 1H), 2.88 – 2.79 (m, 1H), 2.75 – 2.65 (m, 1H), 2.37 (s, 1.5H), 2.35 (s, 1.5H).

<sup>13</sup>C NMR (100 MHz, CDCl<sub>3</sub>) (mixture): δ 153.4, 153.2, 139.2, 138.9, 138.3, 137.5, 136.0, 135.9, 135.9, 135.2, 132.0, 129.9, 129.2, 129.1, 129.0, 128.7, 128.6, 128.2, 128.1, 128.0, 128.0, 127.9, 127.5, 127.4, 125.5, 124.7, 124.0, 123.3, 86.8, 86.8, 73.6, 71.2, 71.2, 35.2, 35.1, 21.4, 21.3.

HRMS (ESI-TOF): calc'd for C<sub>23</sub>H<sub>22</sub>NaO<sub>2</sub><sup>+</sup> [M+Na<sup>+</sup>] 353.1512, found 353.1504.

### 6-((benzyloxy)methyl)-3-methoxy-6,7-dihydrodibenzo[*b,d*]oxepine (3x)

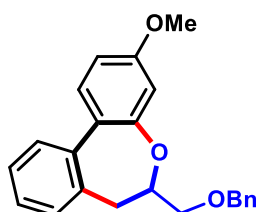

**Physical state:** colorless oil;

**Yield:** 31%;

*R<sub>f</sub>* = 0.3 (silica gel, PE:EtOAc = 20:1);

<sup>1</sup>H NMR (400 MHz, CDCl<sub>3</sub>): δ 7.38 – 7.28 (m, 7H), 7.25 – 7.19 (m, 2H), 7.08 (dd, *J* = 7.8, 1.5 Hz, 1H), 6.92 (dd, *J* = 8.4, 2.7 Hz, 1H), 6.80 (d, *J* = 2.7 Hz, 1H), 4.85 – 4.79 (m, 1H), 4.64 (d, *J* = 12.0 Hz, 1H), 4.59 (d, *J* = 12.0 Hz, 1H), 3.84 (s, 3H), 3.74 (dd, *J* = 9.7, 5.9 Hz, 1H), 3.55 (dd, *J* = 9.7, 6.3 Hz, 1H), 2.84 (dd, *J* = 14.2, 5.2 Hz, 1H), 2.70 (dd, *J* = 14.2, 6.9 Hz, 1H);

<sup>13</sup>C NMR (100 MHz, CDCl<sub>3</sub>): δ 159.3, 153.2, 138.3, 137.4, 134.9, 131.3, 129.2, 129.1, 128.6, 128.5, 128.0, 127.9, 124.7, 123.3, 114.9, 112.6, 86.5, 73.7, 71.4, 55.5, 35.5;

HRMS (ESI-TOF): calc'd for C<sub>23</sub>H<sub>22</sub>NaO<sub>3</sub><sup>+</sup> [M+Na<sup>+</sup>] 369.1461, found 369.1453.

### 6-((benzyloxy)methyl)-9-methoxy-6,7-dihydrodibenzo[*b,d*]oxepine (3x'')

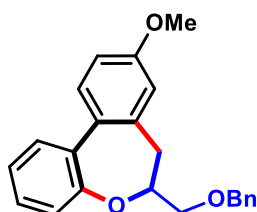

**Physical state:** colorless oil;

**Yield:** 43%;

$R_f = 0.3$  (silica gel, PE:EtOAc = 20:1);

$^1\text{H NMR}$  (400 MHz,  $\text{CDCl}_3$ ):  $\delta$  7.41 – 7.29 (m, 8H), 7.27 – 7.23 (m, 1H), 7.19 (dd,  $J = 7.4, 1.4$  Hz, 1H), 6.80 (dd,  $J = 8.5, 2.6$  Hz, 1H), 6.69 (d,  $J = 2.6$  Hz, 1H), 87 – 4.81 (m, 1H), 4.65 (d,  $J = 12.1$  Hz, 1H), 4.59 (d,  $J = 12.1$  Hz, 1H), 3.82 (s, 3H), 3.74 (dd,  $J = 9.7, 6.0$  Hz, 1H), 3.55 (dd,  $J = 9.7, 6.2$  Hz, 1H), 2.88 (dd,  $J = 14.2, 5.2$  Hz, 1H), 2.74 (dd,  $J = 14.2, 6.8$  Hz, 1H);

$^{13}\text{C NMR}$  (100 MHz,  $\text{CDCl}_3$ ):  $\delta$  160.5, 154.4, 138.7, 138.3, 135.8, 129.8, 129.1, 128.6, 128.0, 127.9, 127.8, 127.5, 127.4, 127.2, 110.8, 108.7, 87.0, 73.7, 71.4, 55.6, 35.3;

**HRMS** (ESI-TOF): calc'd for  $\text{C}_{23}\text{H}_{22}\text{NaO}_3^+$  [ $\text{M}+\text{Na}^+$ ] 369.1461, found 369.1448.

### 6-((benzyloxy)methyl)-6,7-dihydrodibenzo[*b,d*]oxepine-3-carbaldehyde (3y)

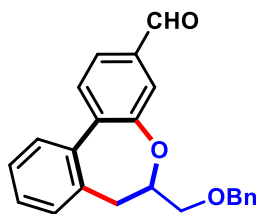

**Physical state:** colorless oil;

**Yield:** 34%;

$R_f = 0.2$  (silica gel, PE:EtOAc = 5:1);

$^1\text{H NMR}$  (400 MHz,  $\text{CDCl}_3$ ):  $\delta$  9.99 (s, 1H), 7.75 (dd,  $J = 7.9, 1.6$  Hz, 1H), 7.58 (d,  $J = 7.3$  Hz, 2H), 7.48 (dd,  $J = 7.6, 1.5$  Hz, 1H), 7.43 – 7.29 (m, 7H), 7.24 (dd,  $J = 7.3, 1.3$  Hz, 1H), 4.91 – 4.85 (m, 1H), 4.64 (d,  $J = 12.0$  Hz, 1H), 4.59 (d,  $J = 12.0$  Hz, 1H), 3.74 (dd,  $J = 9.8, 5.7$  Hz, 1H), 3.58 (dd,  $J = 9.8, 6.1$  Hz, 1H), 2.87 (dd,  $J = 14.4, 5.1$  Hz, 1H), 2.78 (dd,  $J = 14.4, 7.2$  Hz, 1H);

$^{13}\text{C NMR}$  (100 MHz,  $\text{CDCl}_3$ ):  $\delta$  191.7, 154.1, 141.7, 138.1, 137.6, 137.2, 136.3, 130.1, 129.3, 128.9, 128.7, 128.4, 128.1, 128.0, 127.8, 125.9, 124.5, 87.4, 73.7, 71.1, 35.0;

**HRMS** (ESI-TOF): calc'd for  $\text{C}_{23}\text{H}_{20}\text{NaO}_3^+$  [ $\text{M}+\text{Na}^+$ ] 367.1304, found 367.1301.

**6-((benzyloxy)methyl)-6,7-dihydrodibenzo[b,d]oxepine-9-carbaldehyde (3y')**

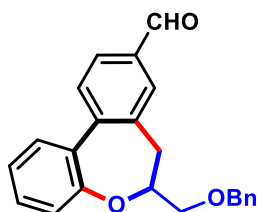

**Physical state:** colorless oil;

**Yield:** 17%;

**R<sub>f</sub>** = 0.1 (silica gel, PE:EtOAc = 5:1);

**<sup>1</sup>H NMR** (400 MHz, CDCl<sub>3</sub>): δ 10.02 (s, 1H), 7.88 (dd, *J* = 7.9, 1.7 Hz, 1H), 7.71 (d, *J* = 1.7 Hz, 1H), 7.60 (d, *J* = 7.8 Hz, 1H), 7.44 (dd, *J* = 7.5, 1.8 Hz, 1H), 7.41 – 7.25 (m, 7H), 7.12 (dd, *J* = 8.0, 1.3 Hz, 1H), 4.87 – 4.81 (m, 1H), 4.64 (d, *J* = 12.0 Hz, 1H), 4.57 (d, *J* = 12.0 Hz, 1H), 3.73 (dd, *J* = 9.8, 5.9 Hz, 1H), 3.55 (dd, *J* = 9.8, 6.2 Hz, 1H), 2.95 (dd, *J* = 14.3, 5.4 Hz, 1H), 2.83 (dd, *J* = 14.3, 6.6 Hz, 1H);

**<sup>13</sup>C NMR** (100 MHz, CDCl<sub>3</sub>): δ 192.2, 153.7, 145.4, 138.1, 137.1, 135.6, 134.0, 130.3, 130.2, 129.5, 129.3, 128.8, 128.7, 128.1, 128.1, 125.0, 123.7, 86.9, 73.7, 71.0, 35.0;

**HRMS** (ESI-TOF): calc'd for C<sub>23</sub>H<sub>20</sub>NaO<sub>3</sub><sup>+</sup> [M+Na<sup>+</sup>] 367.1304, found 367.1308.

**1-(benzyloxy)-3-(phenanthren-4-yl)propan-2-one (4)**

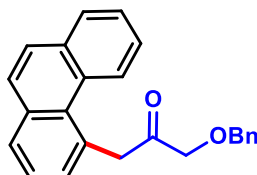

**Physical state:** colorless oil;

**Yield:** 74%;

**R<sub>f</sub>** = 0.3 (silica gel, PE:EtOAc = 20:1);

**<sup>1</sup>H NMR** (400 MHz, CDCl<sub>3</sub>): δ 8.35 (d, *J* = 8.2 Hz, 1H), 7.88 (dd, *J* = 7.7, 1.7 Hz, 1H), 7.81 (dd, *J* = 7.9, 1.5 Hz, 1H), 7.69 (s, 2H), 7.58 – 7.48 (m, 3H), 7.39 (dd, *J* = 7.4, 1.5 Hz, 1H), 7.32 – 7.21 (m, 5H), 4.63 (s, 2H), 4.53 (s, 2H), 4.16 (s, 2H);

**<sup>13</sup>C NMR** (100 MHz, CDCl<sub>3</sub>): δ 207.0, 137.2, 134.2, 133.6, 132.2, 130.8, 130.5, 130.2, 129.1, 129.0, 128.6, 128.1, 128.0, 128.0, 127.5, 126.4, 126.3, 126.2, 126.1, 75.0, 73.5, 49.8;

HRMS (ESI-TOF): calc'd for  $C_{24}H_{20}NaO_2^+$  [M+Na<sup>+</sup>] 363.1356, found 363.1354.

## 6. Scale-up experiment

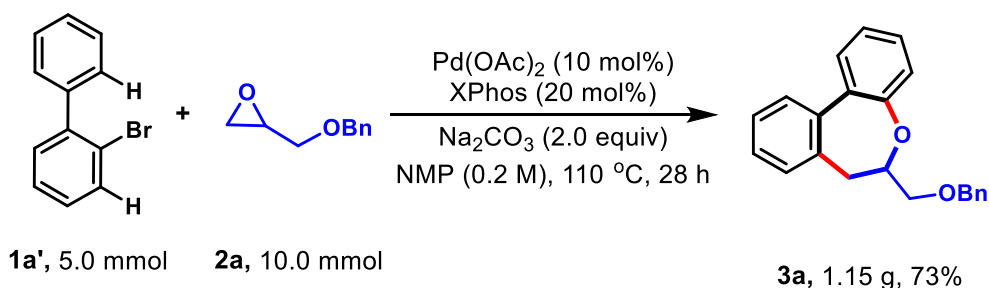

To a 120 mL oven-dried Schlenk tube equipped with a magnetic stir bar was charged with Pd(OAc)<sub>2</sub> (110 mg, 0.5 mmol, 10 mol%), XPhos (482.5 mg, 1.0 mmol, 20 mol%) in the glove box. Then, 7.5 mL of dry NMP was added and the solution was pre-stirred for 30 minutes. After that, Na<sub>2</sub>CO<sub>3</sub> (1.06 g, 10 mmol, 2.0 equiv), 2-bromobiphenyl **1a'** (1.17 g, 5.0 mmol, 1.0 equiv), benzyl glycidyl ether **2a** (1.64 g, 10.0 mmol, 2.0 equiv), and 17.5 mL of dry NMP were added, then the reaction mixture was heated to 110 °C and stirred for 28 h. After completion of the reaction (monitored by TLC), the mixture was cooled to room temperature. H<sub>2</sub>O (50 mL) was added to quench the reaction and the mixture was extracted with EtOAc (50 mL × 3). The organic layers were collected and the combined organic phase was washed with H<sub>2</sub>O (50 mL × 3), NaCl (sat. aq., 50 mL) and dried over anhydrous Na<sub>2</sub>SO<sub>4</sub>, then filtered. The solvents were evaporated under reduced pressure and the residue was directly purified by column chromatography on silica gel to give the desire product **3a** as a colorless oil (1.15 g, 73%).

## 7. References

- [1] T. H. Jepsen, M. Larsen, M. Jørgensen, K. A. Solanko, A. D. Bond, A. Kadziola, M. B. Nielsen. *Eur. J. Org. Chem.* **2011**, *1*, 53-57.
- [2] H.-G. Cheng, C. Wu, H. Chen, R. Chen, G. Qian, Z. Geng, Q. Wei, Y. Xia, J. Zhang, Y. Zhang, Q. Zhou. *Angew. Chem. Int. Ed.* **2018**, *57*, 3444-3448.

## **8. Copies of NMR spectra**

szp-273-1

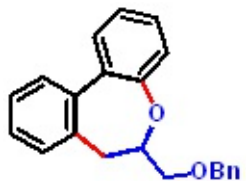

3a

$^1\text{H NMR}$ ,  $\text{CDCl}_3$

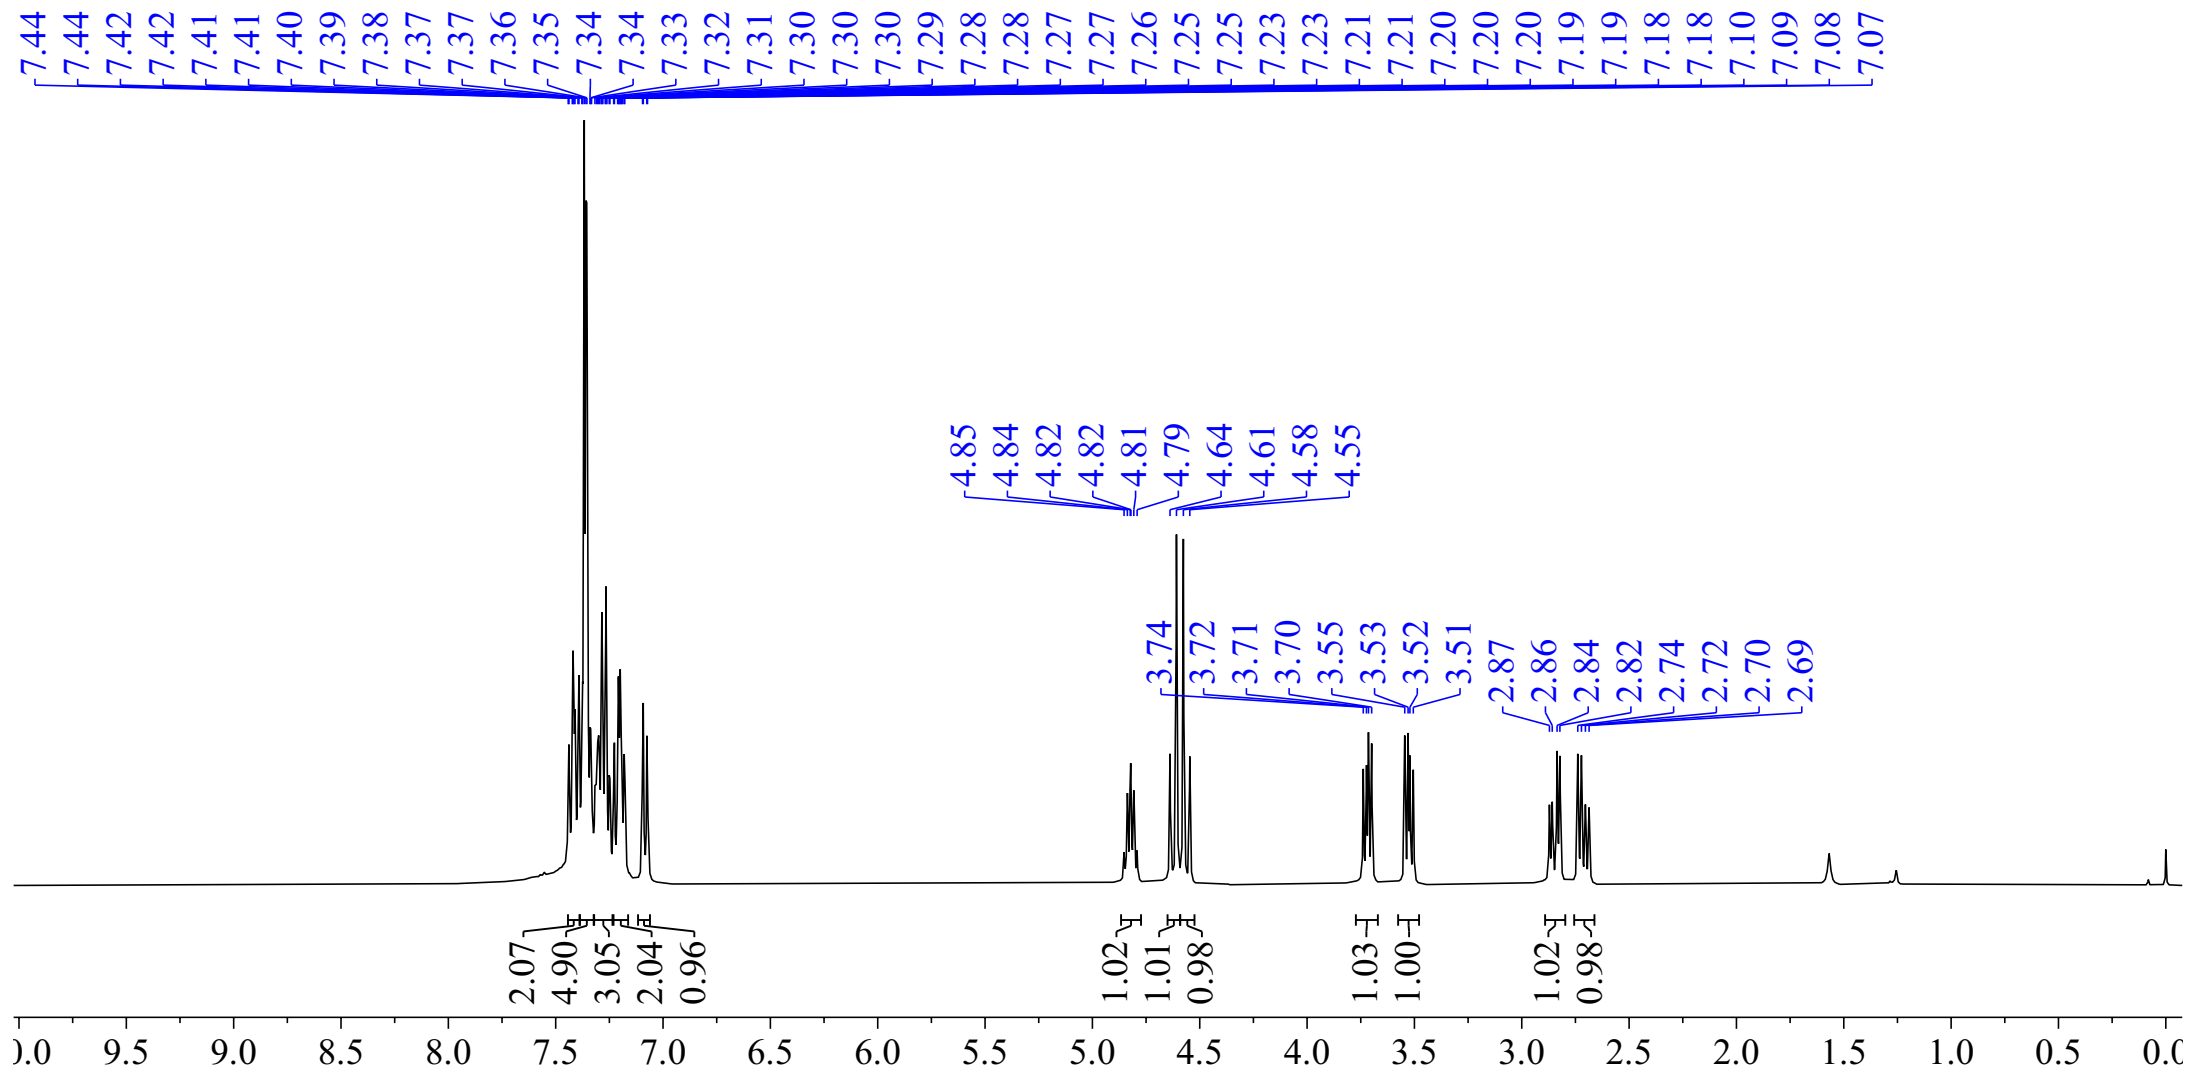

szp-273-1.2.fid

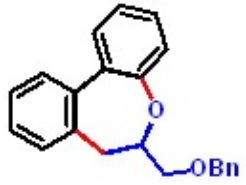

**3a**

$^{13}\text{C}$  NMR,  $\text{CDCl}_3$

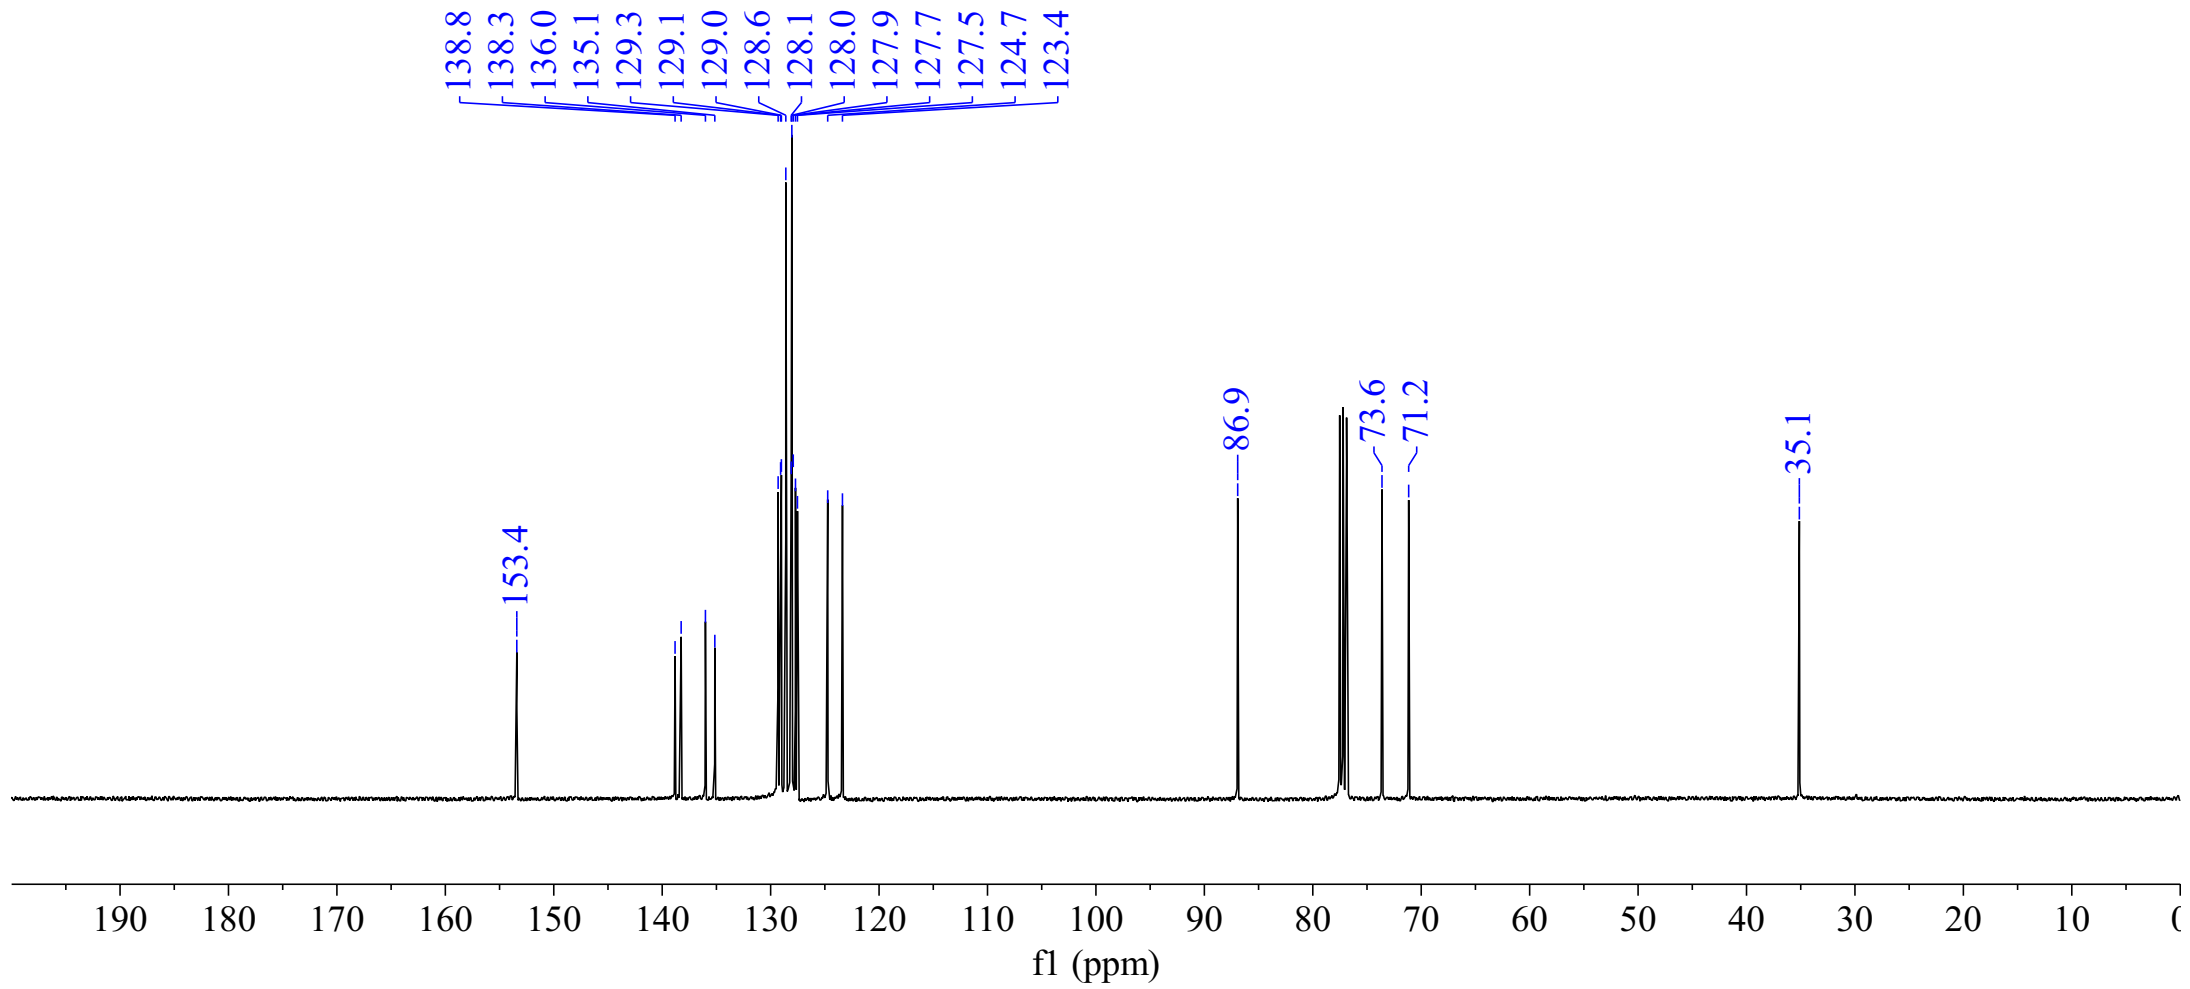



szp-3g1

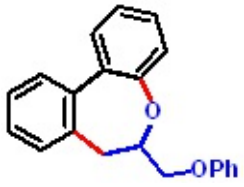

**3b**

<sup>1</sup>H NMR, CDCl<sub>3</sub>

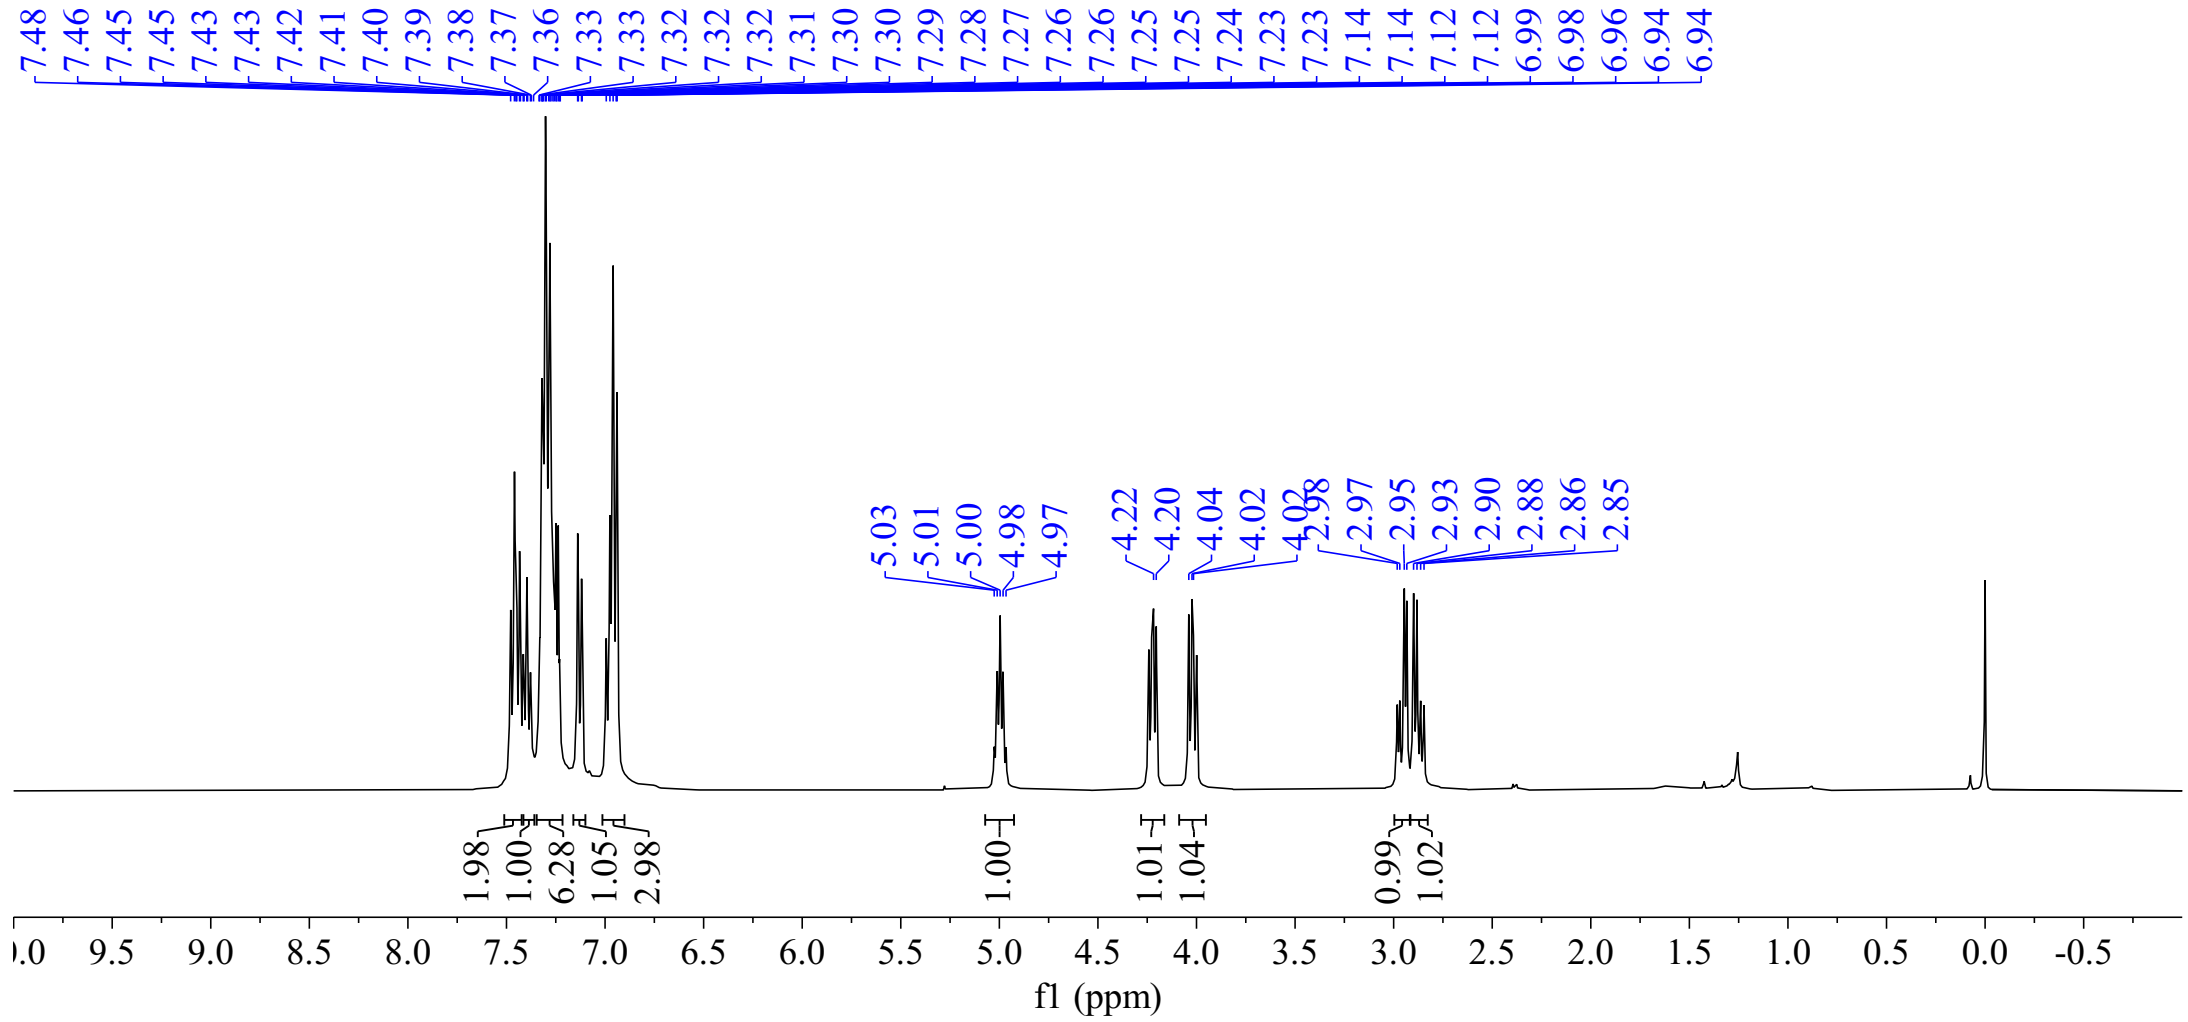

szp-3g1.2.fid

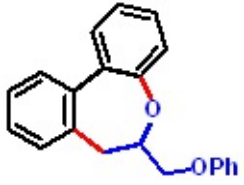

**3b**

$^{13}\text{C}$  NMR,  $\text{CDCl}_3$

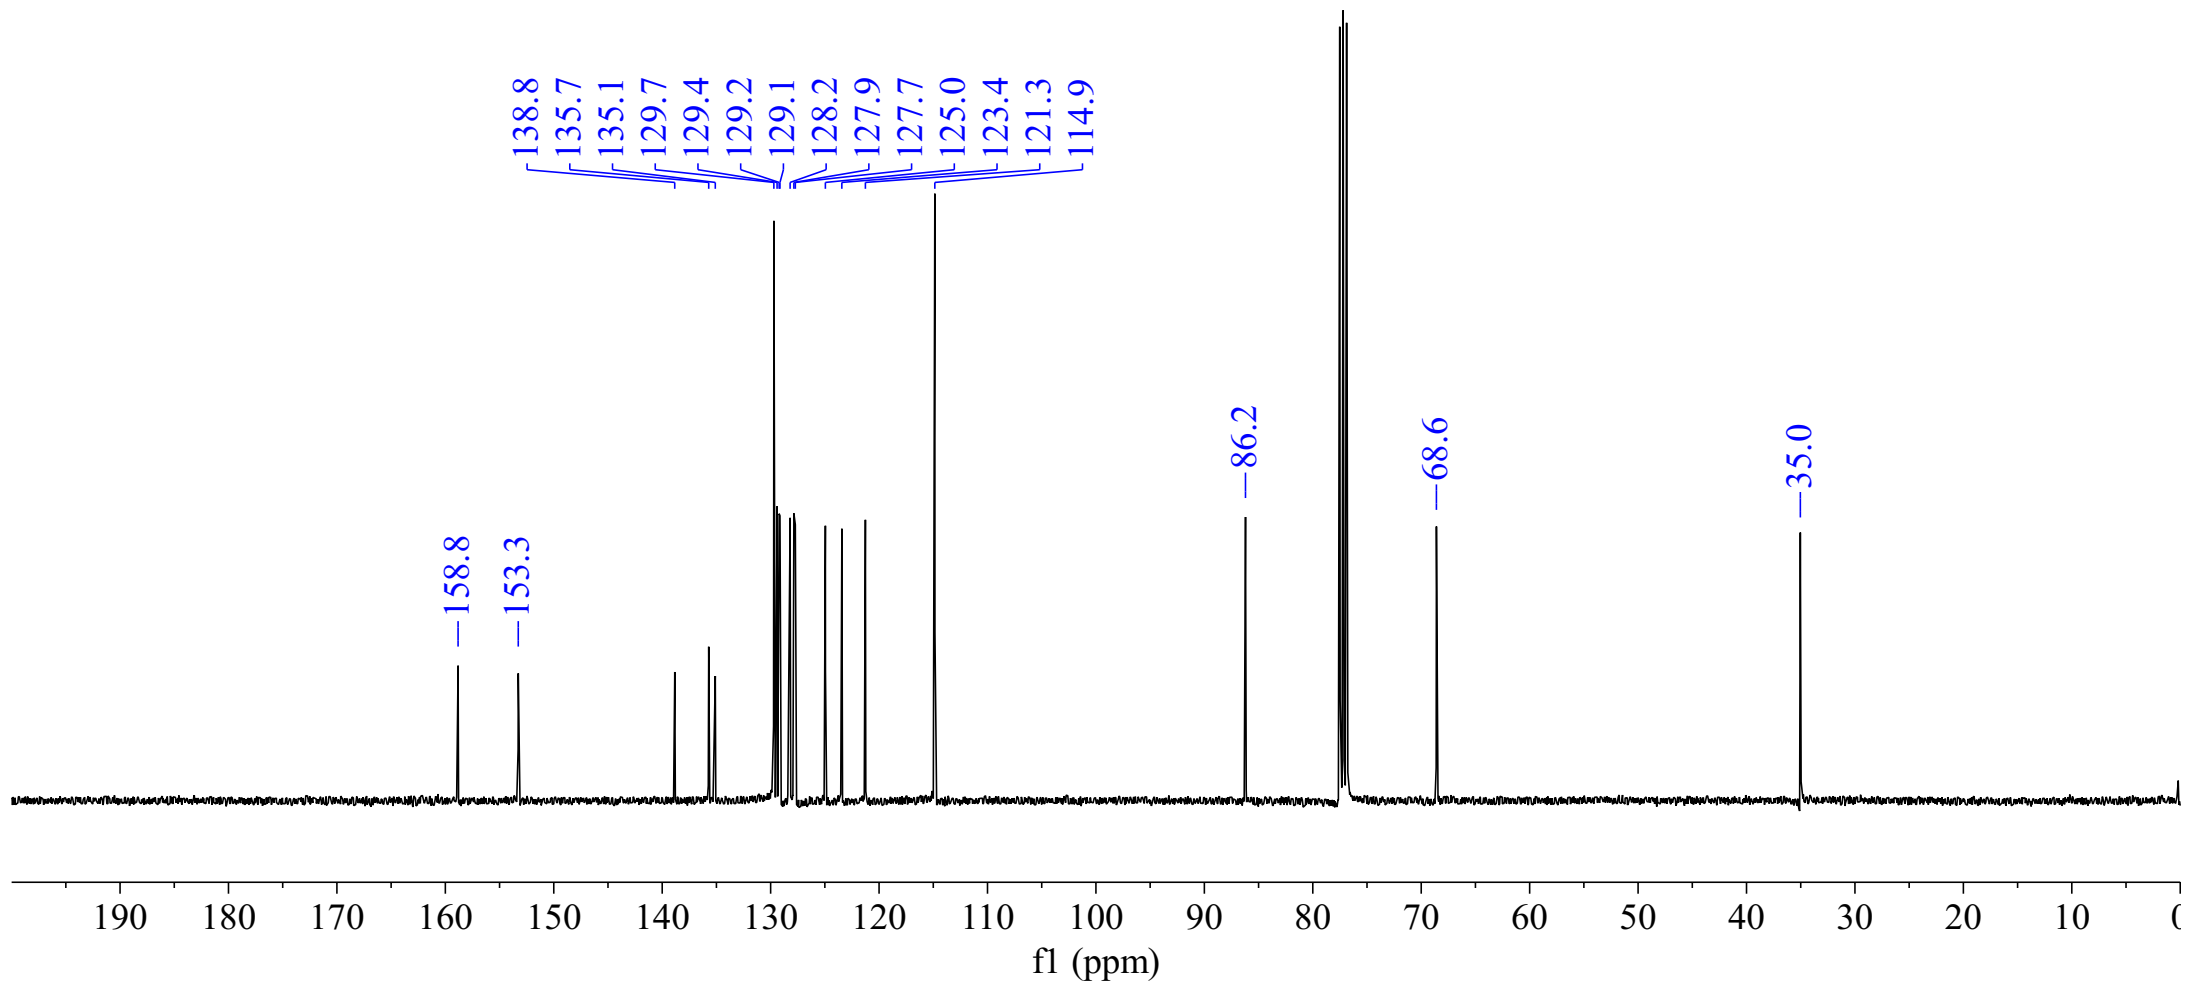

szp-3i1

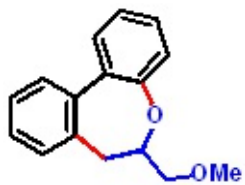

**3c**

$^1\text{H NMR}$ ,  $\text{CDCl}_3$

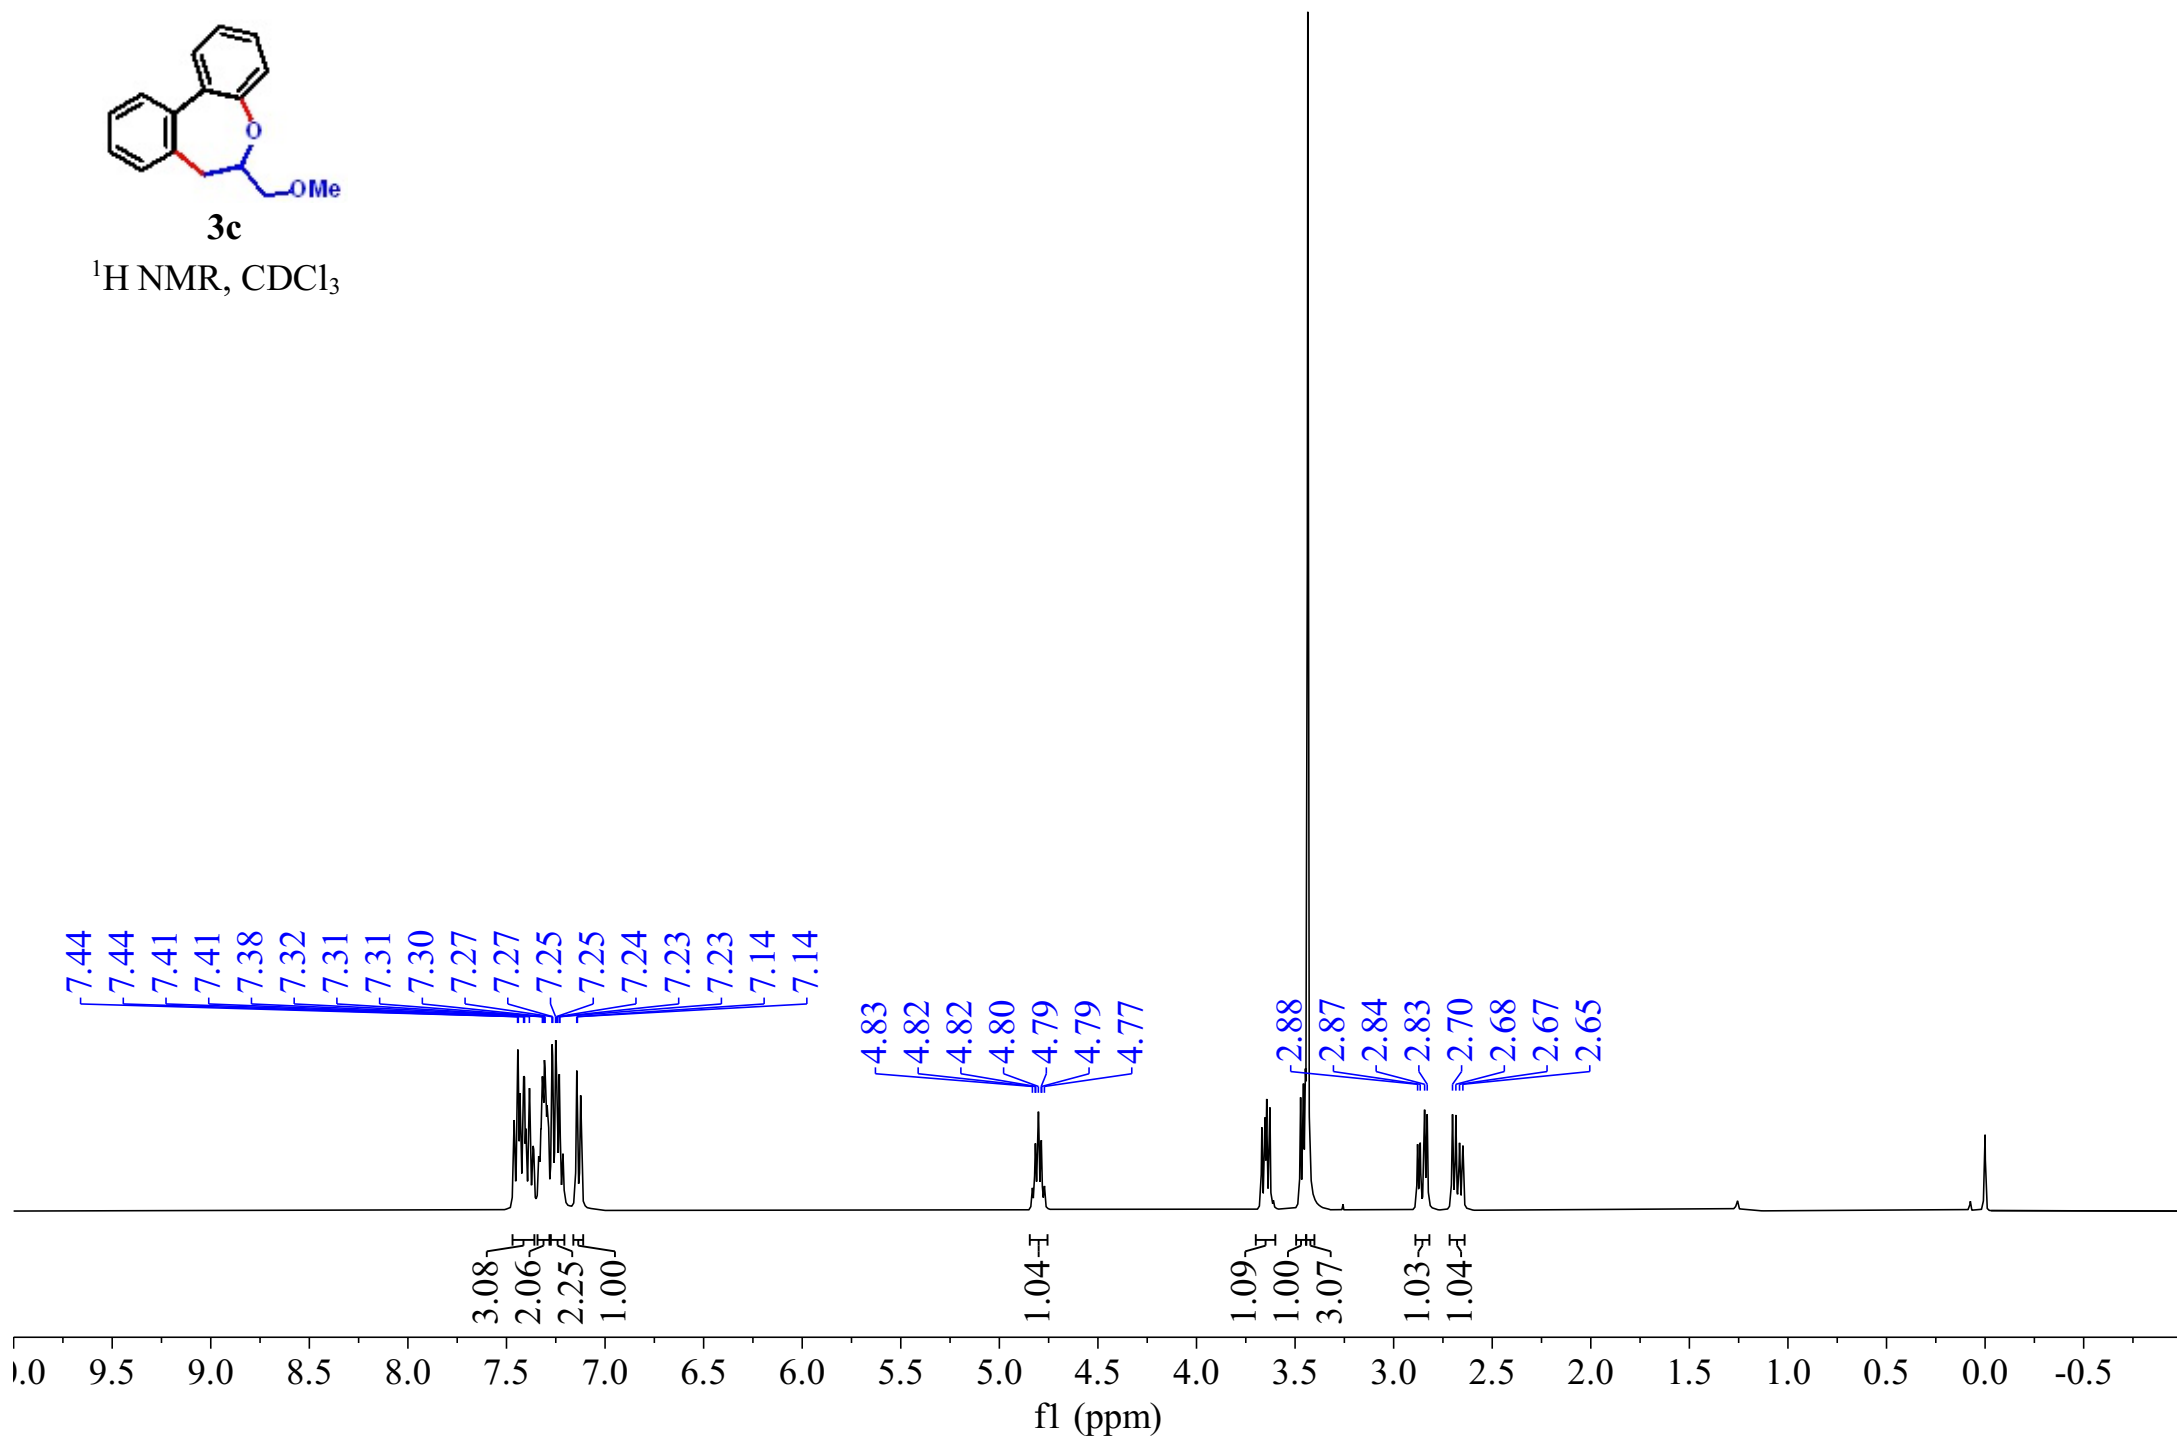

szp-3i1.2.fid

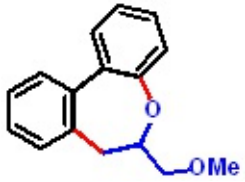

**3c**

$^{13}\text{C}$  NMR,  $\text{CDCl}_3$

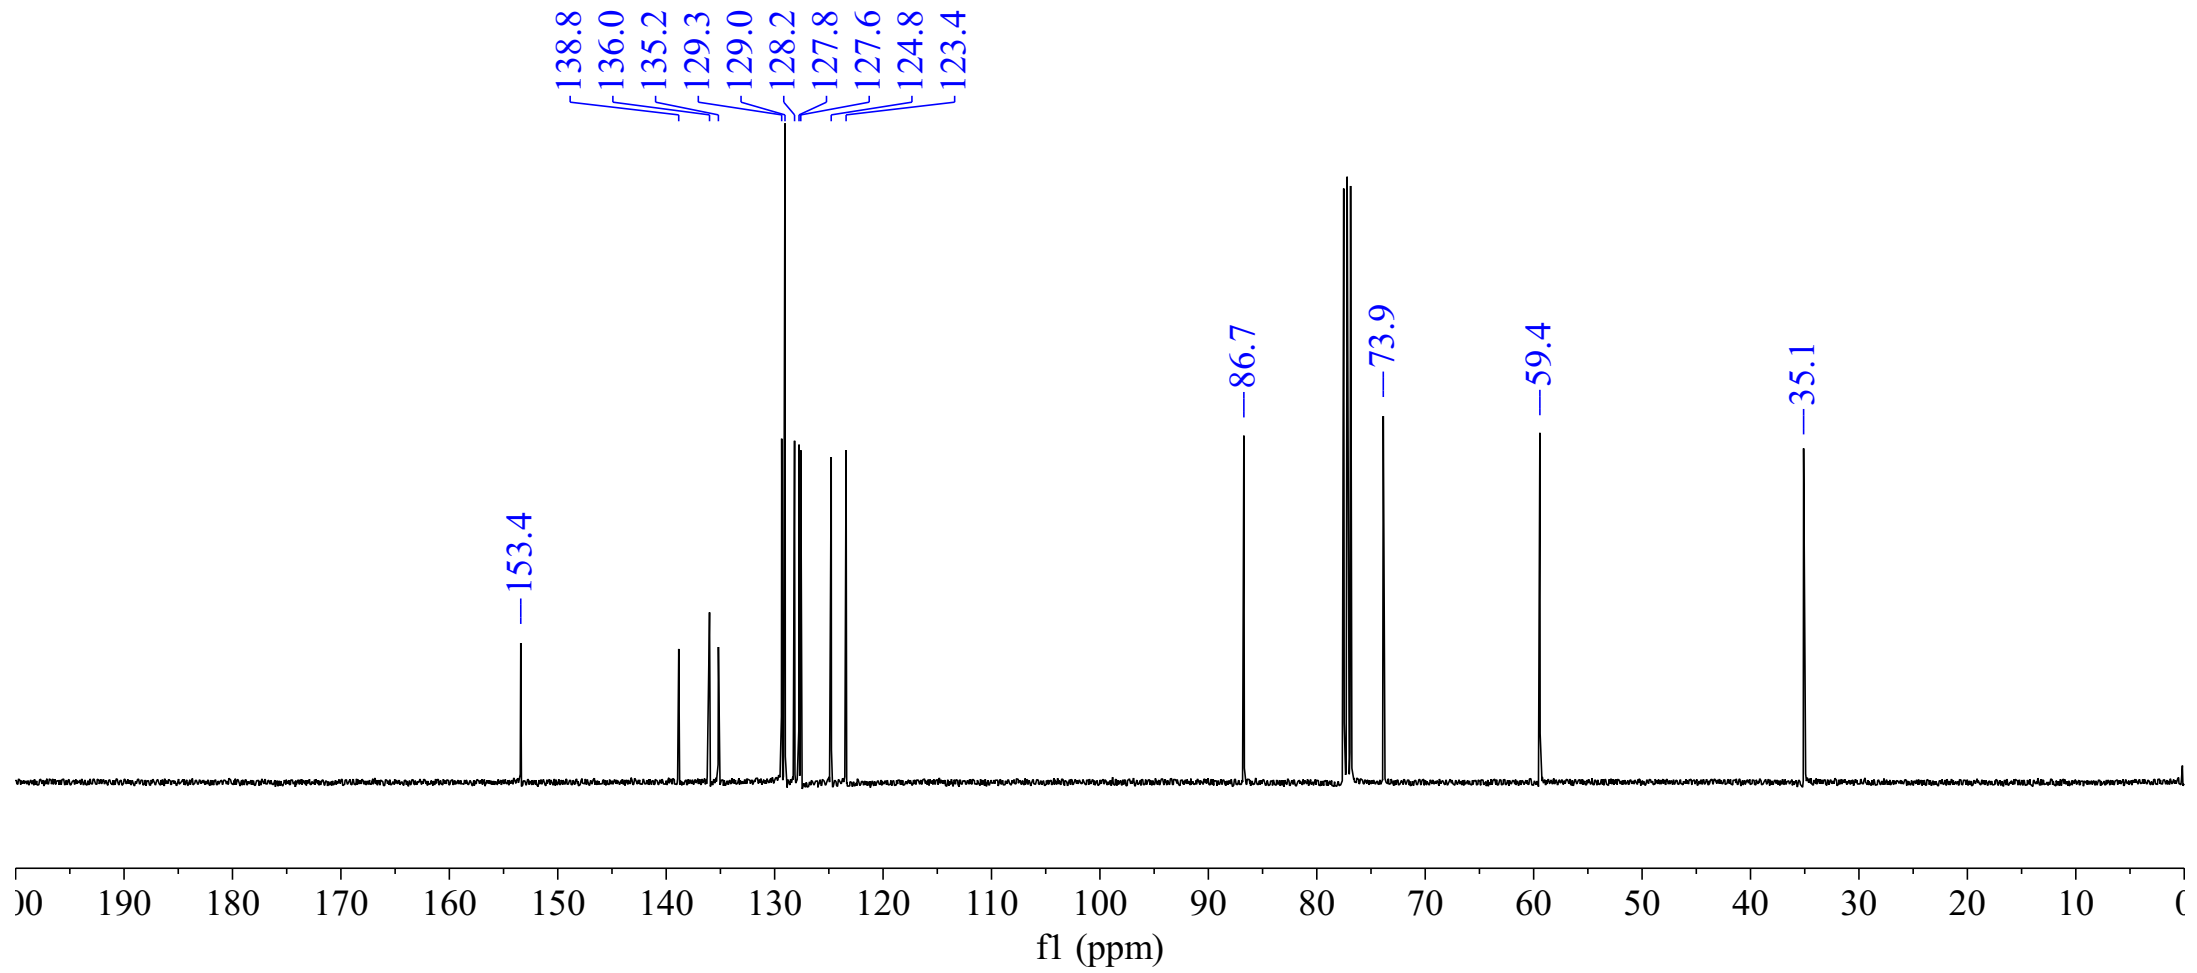

szp-3k1

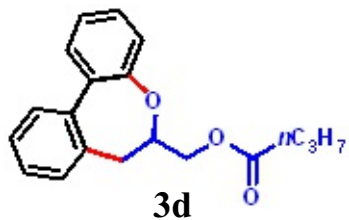

$^1\text{H NMR}$ ,  $\text{CDCl}_3$

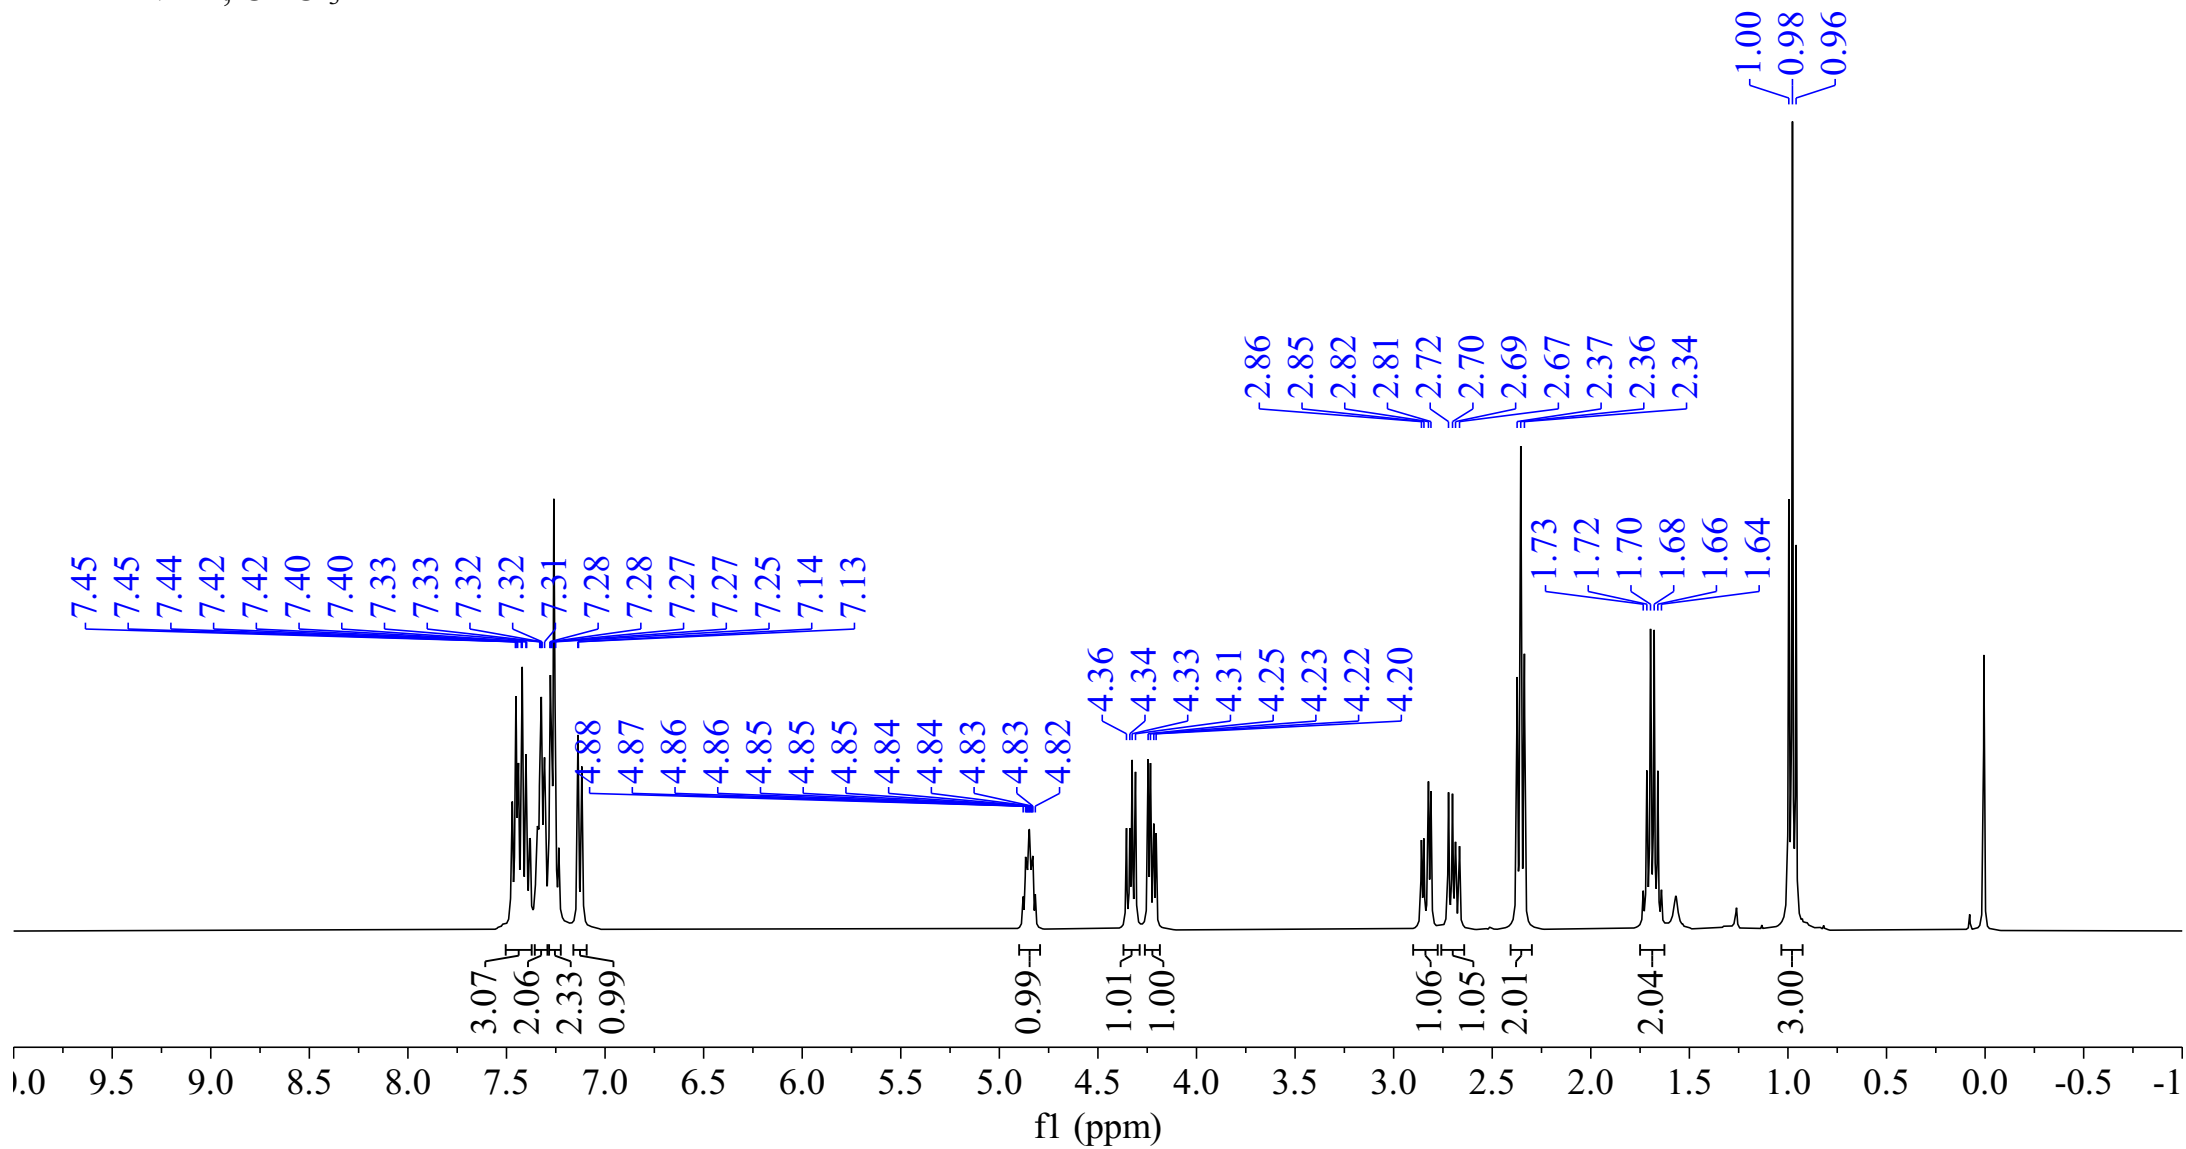

szp-3k1.2.fid

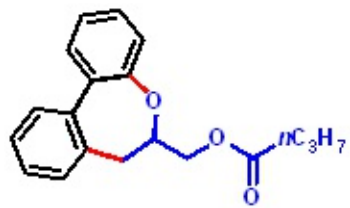

**3d**

$^{13}\text{C}$  NMR,  $\text{CDCl}_3$

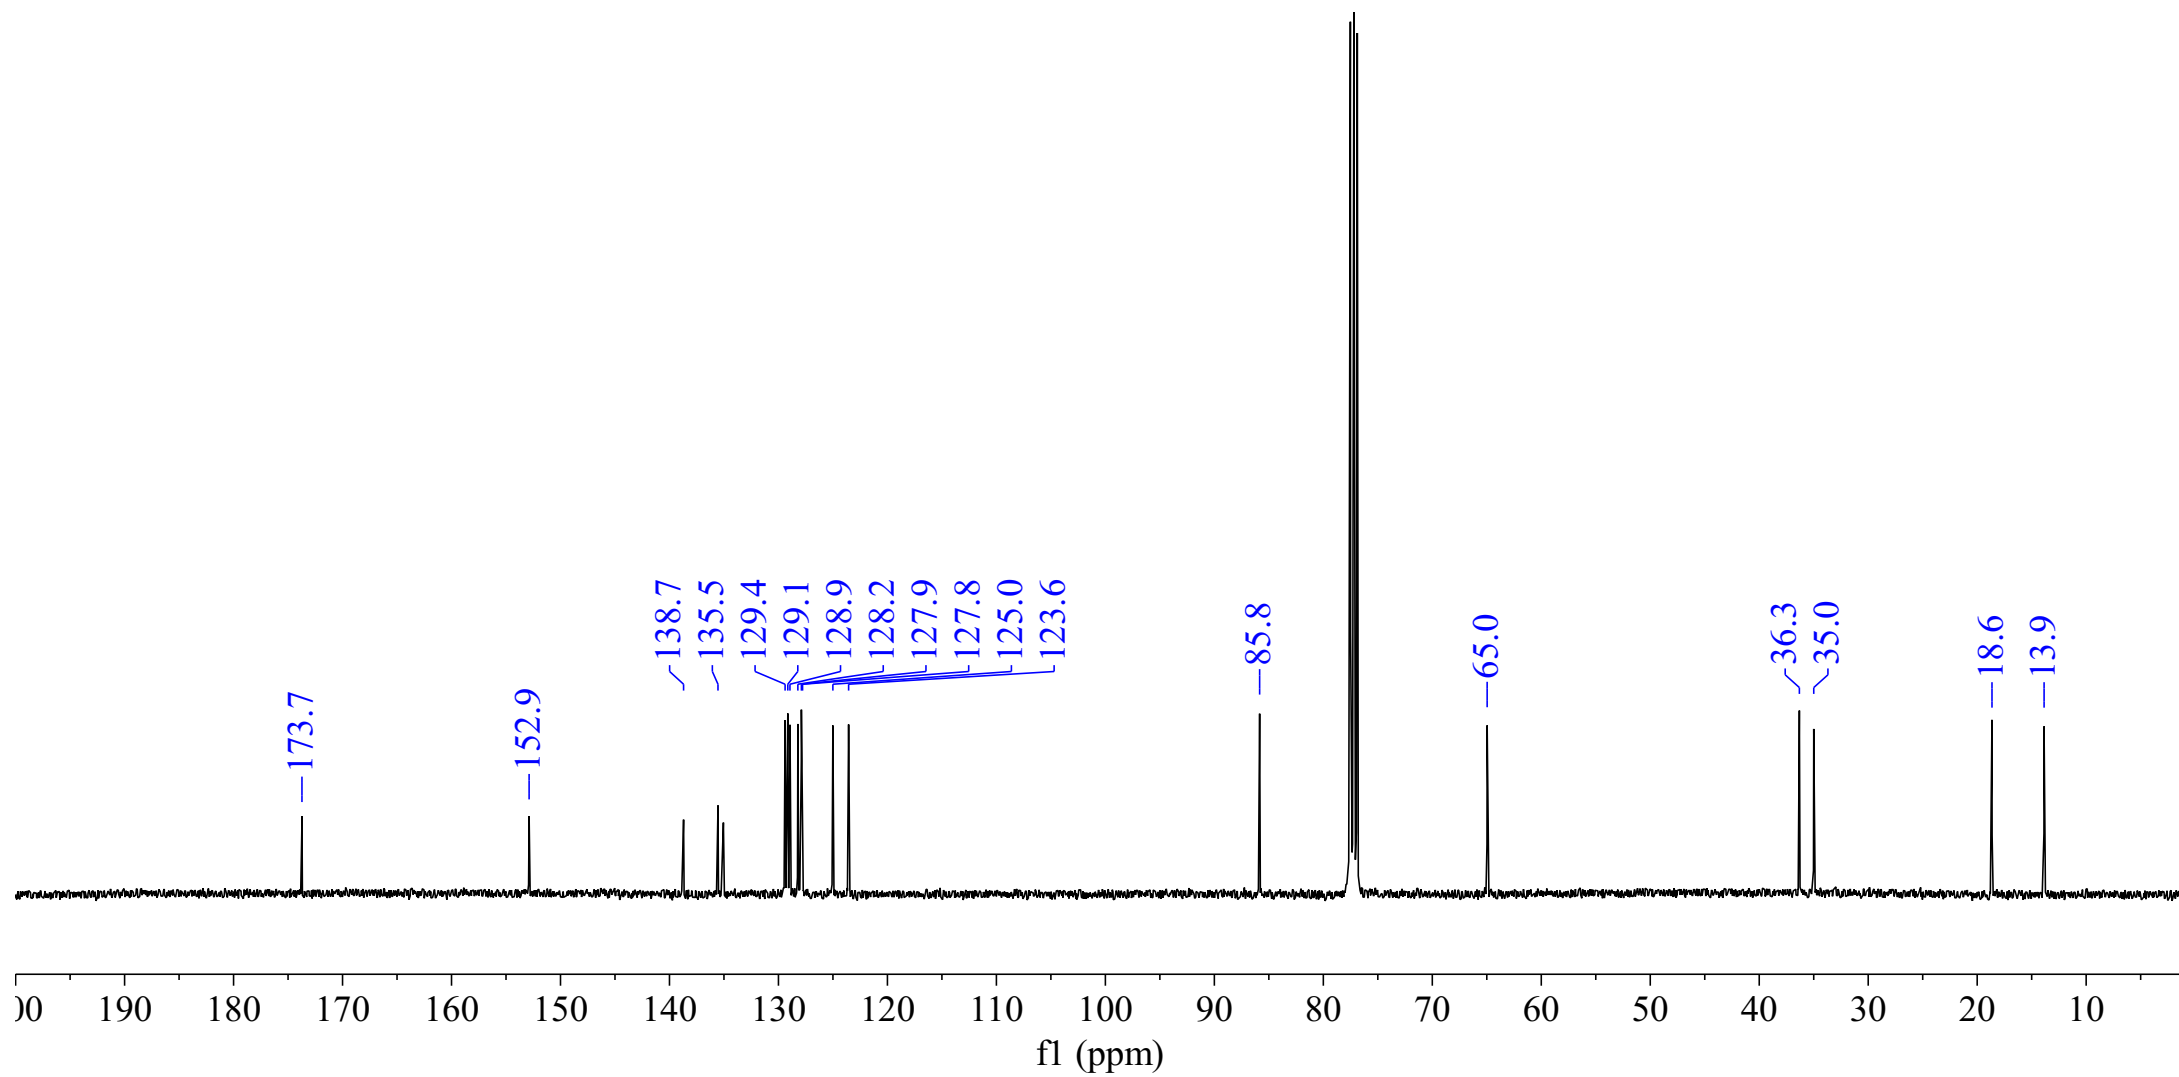

szp-271-33

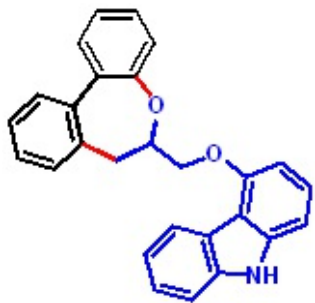

**3e**

$^1\text{H NMR}$ ,  $\text{CDCl}_3$

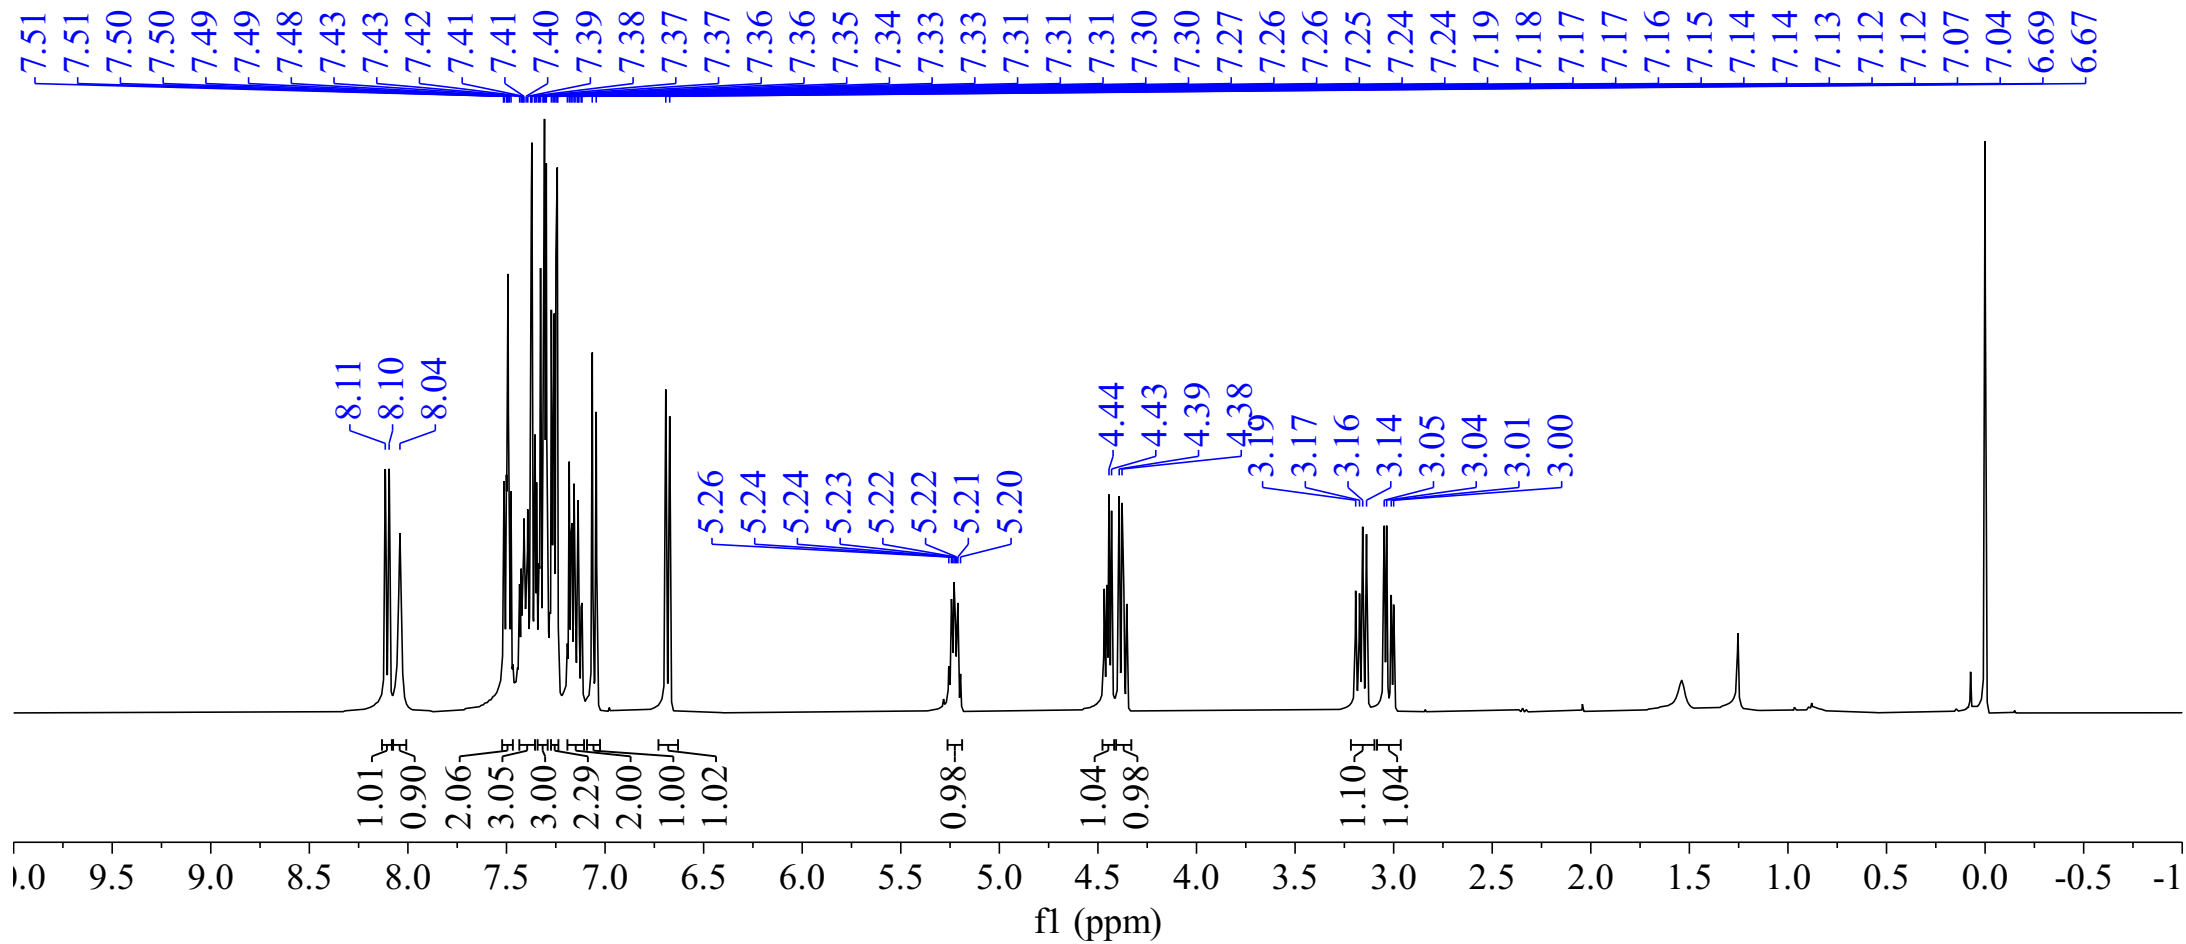

szp-271-33.2.fid

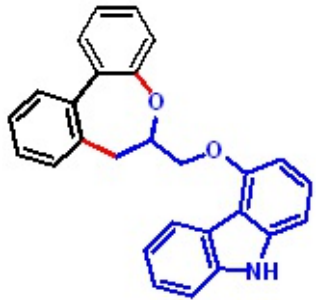

**3e**

$^{13}\text{C}$  NMR,  $\text{CDCl}_3$

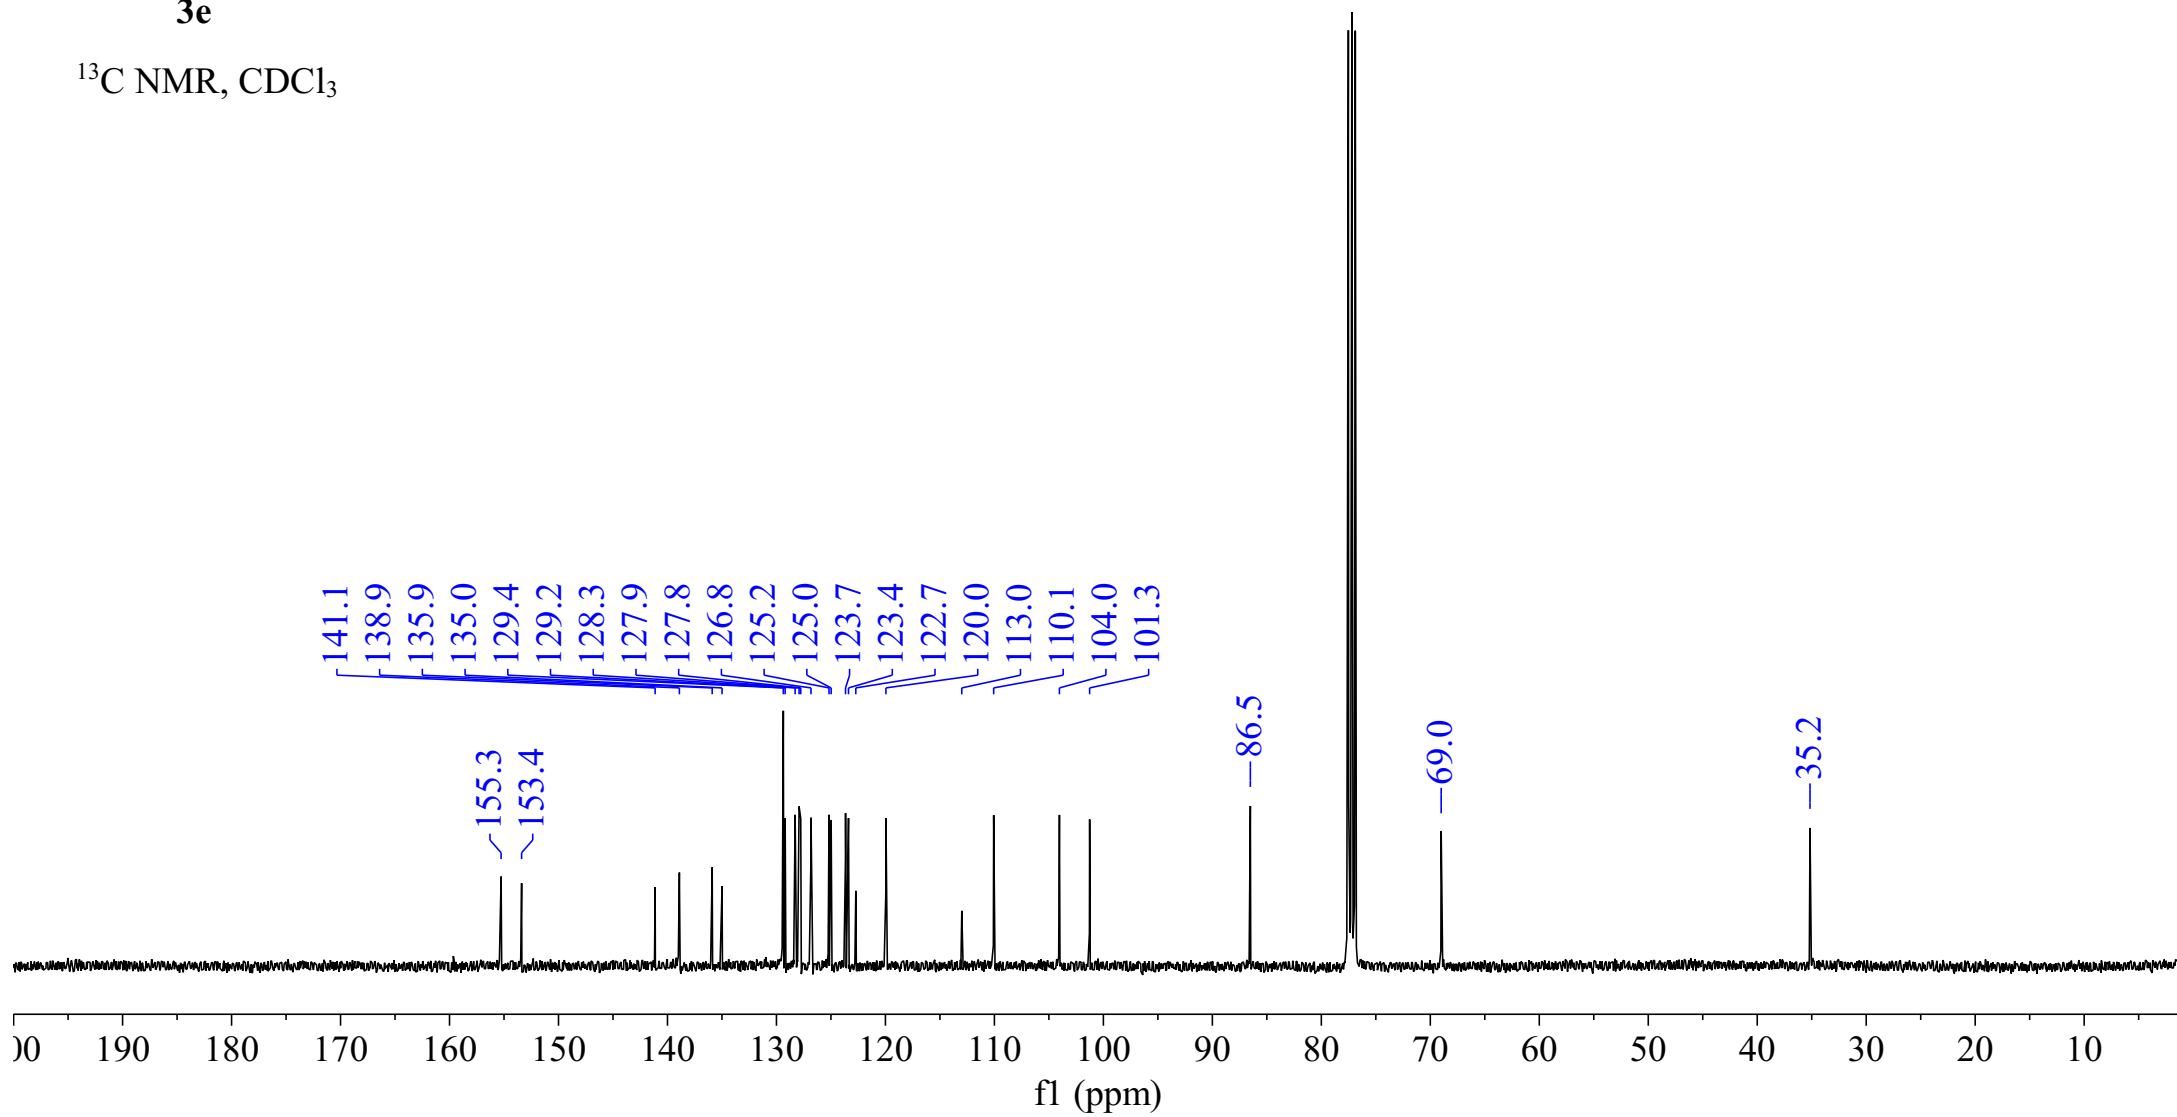



szp-3n1

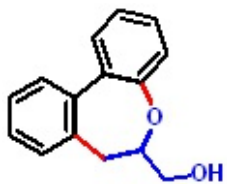

**3f**

$^1\text{H}$  NMR,  $\text{CDCl}_3$

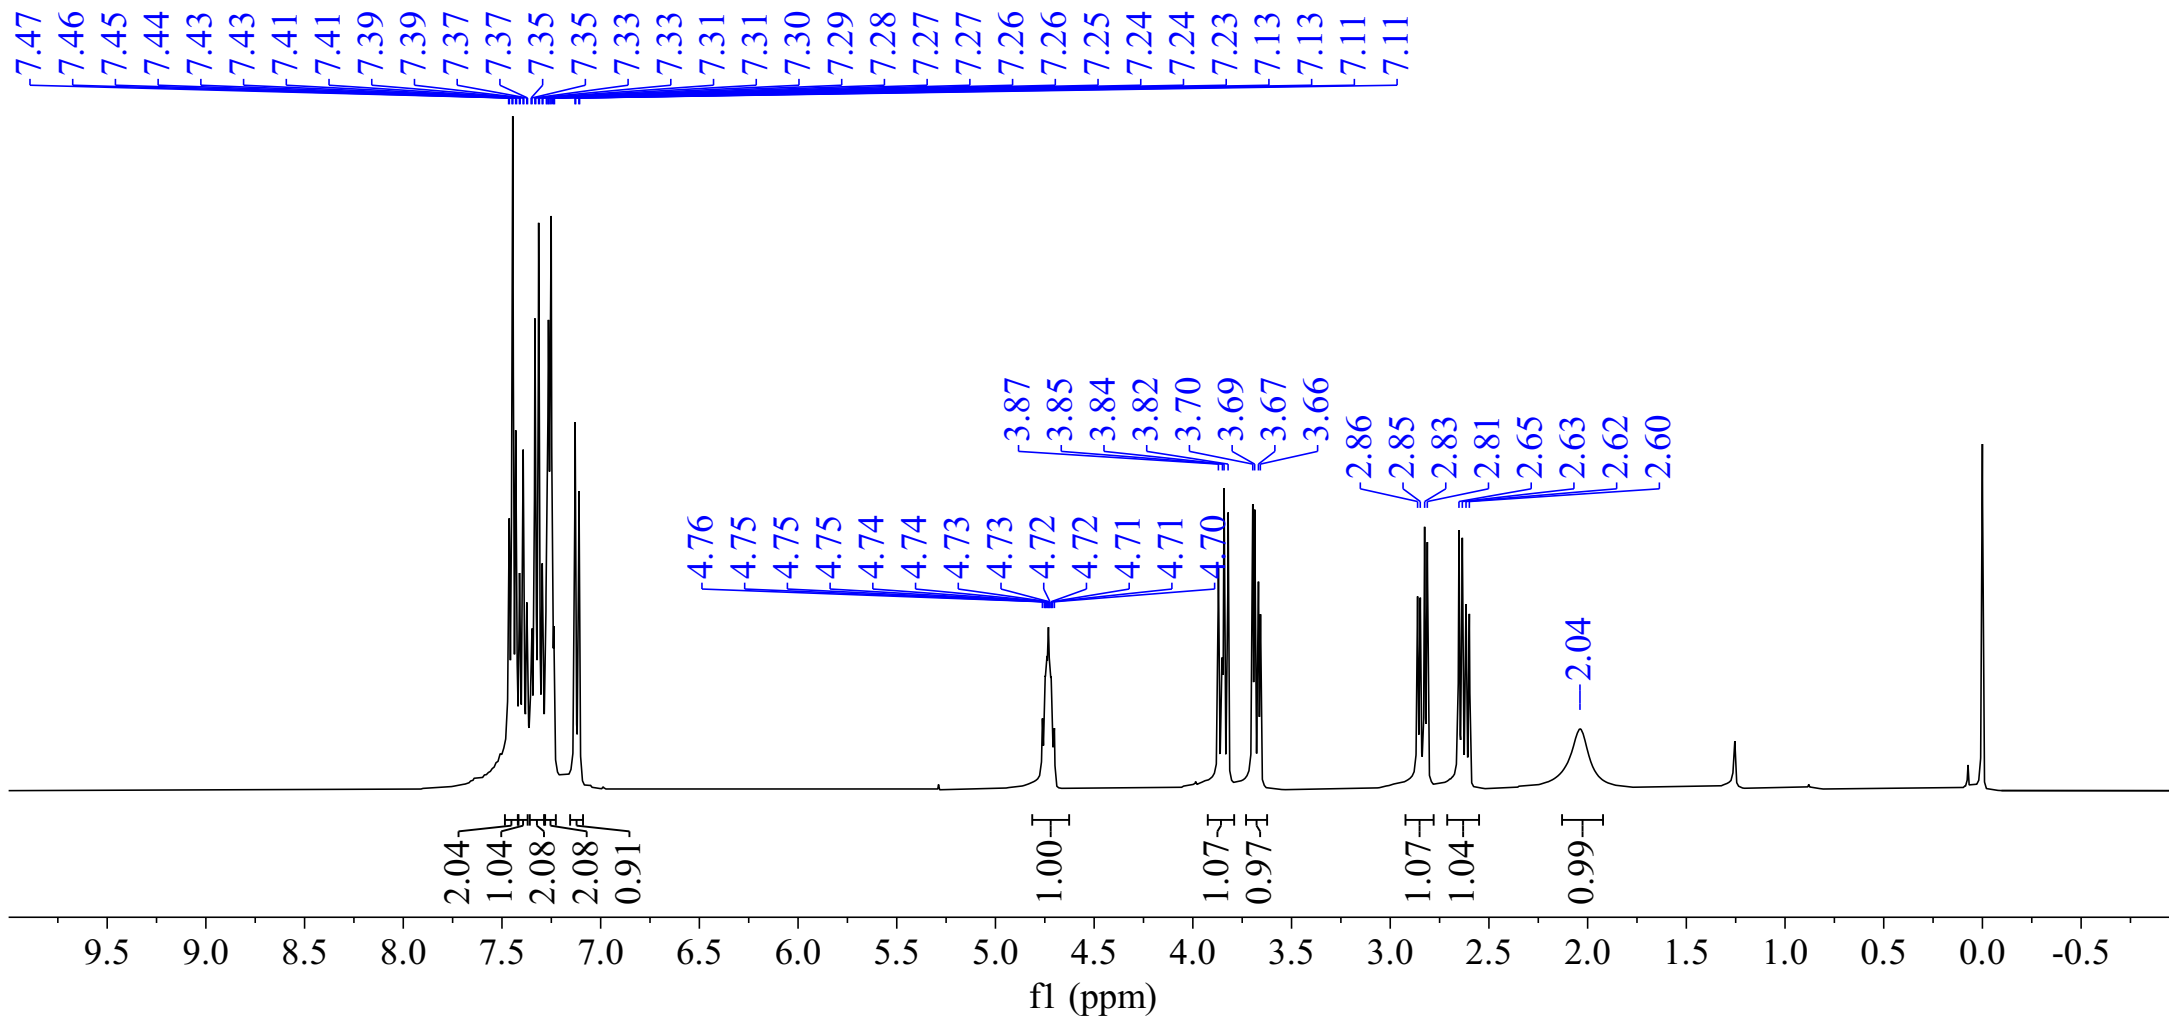

szp-3n1.2.fid

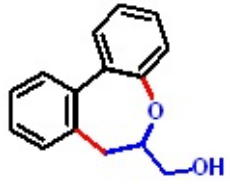

**3f**

$^{13}\text{C}$  NMR,  $\text{CDCl}_3$

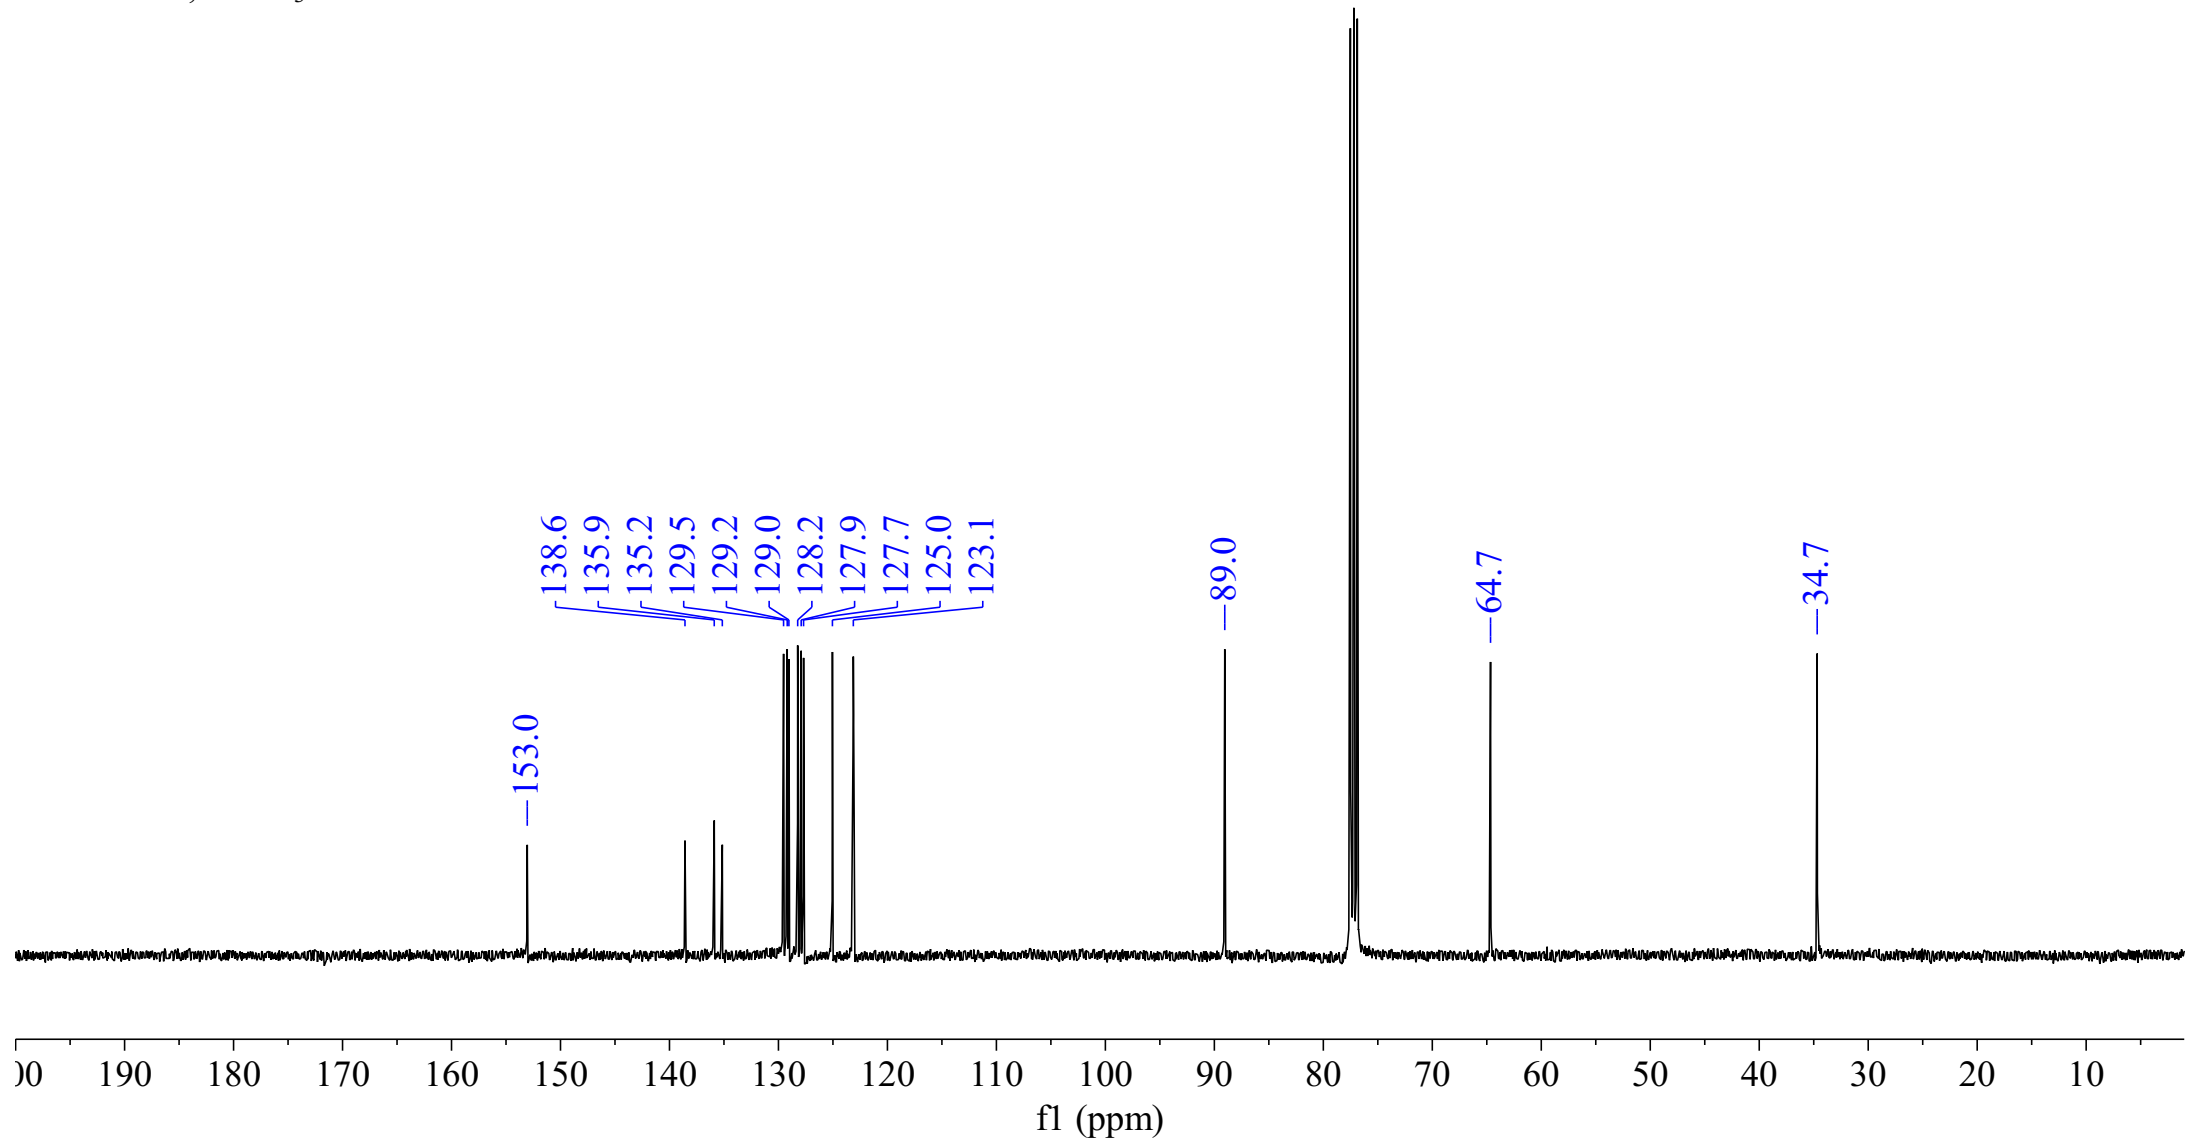

SZP-282-11.1.1.1r

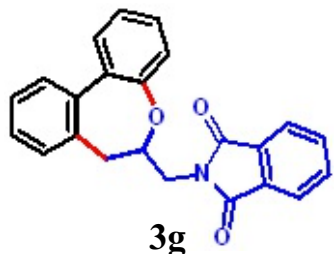

$^1\text{H NMR}$ ,  $\text{CDCl}_3$

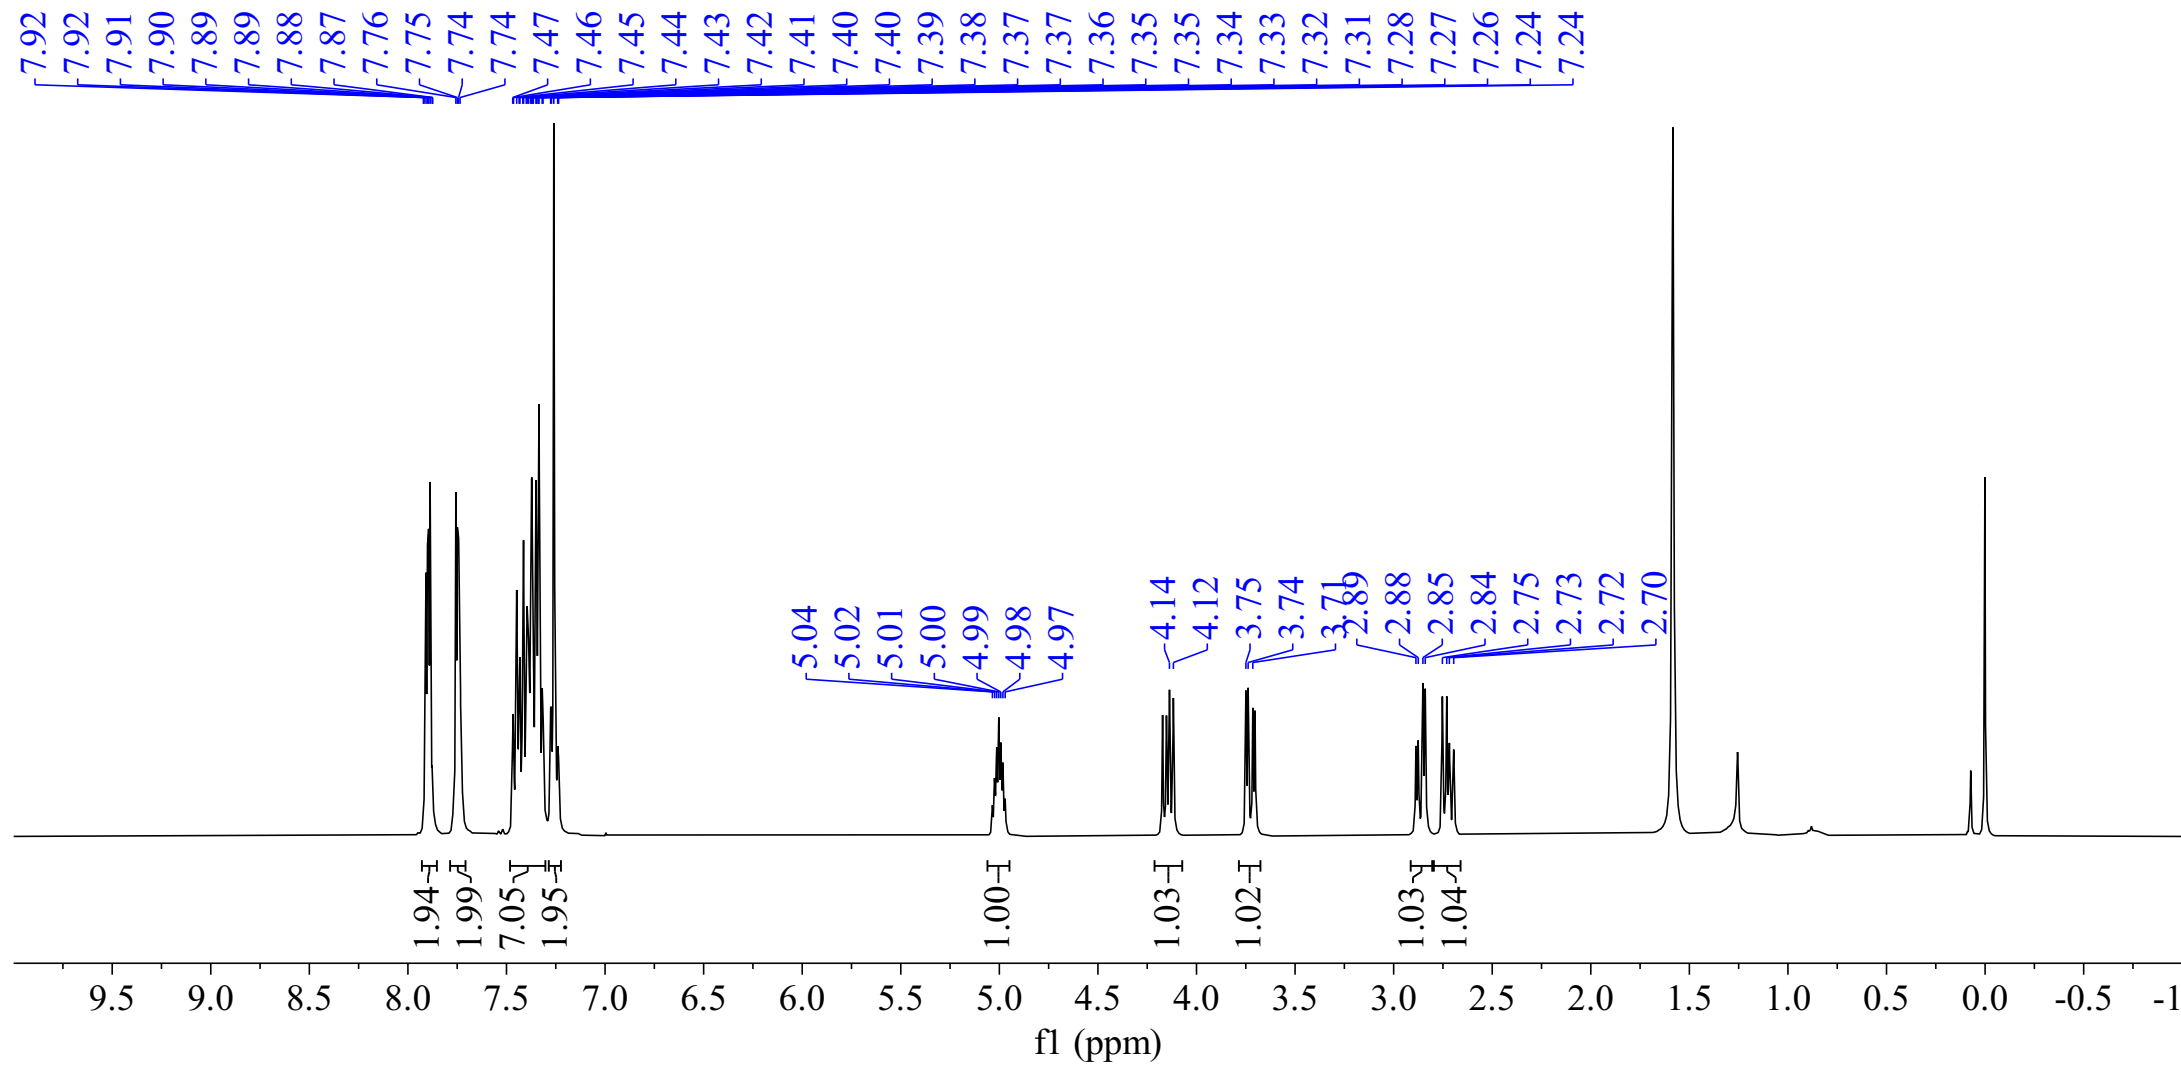

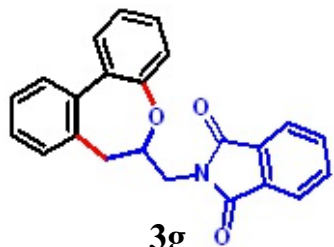

$^{13}\text{C}$  NMR,  $\text{CDCl}_3$

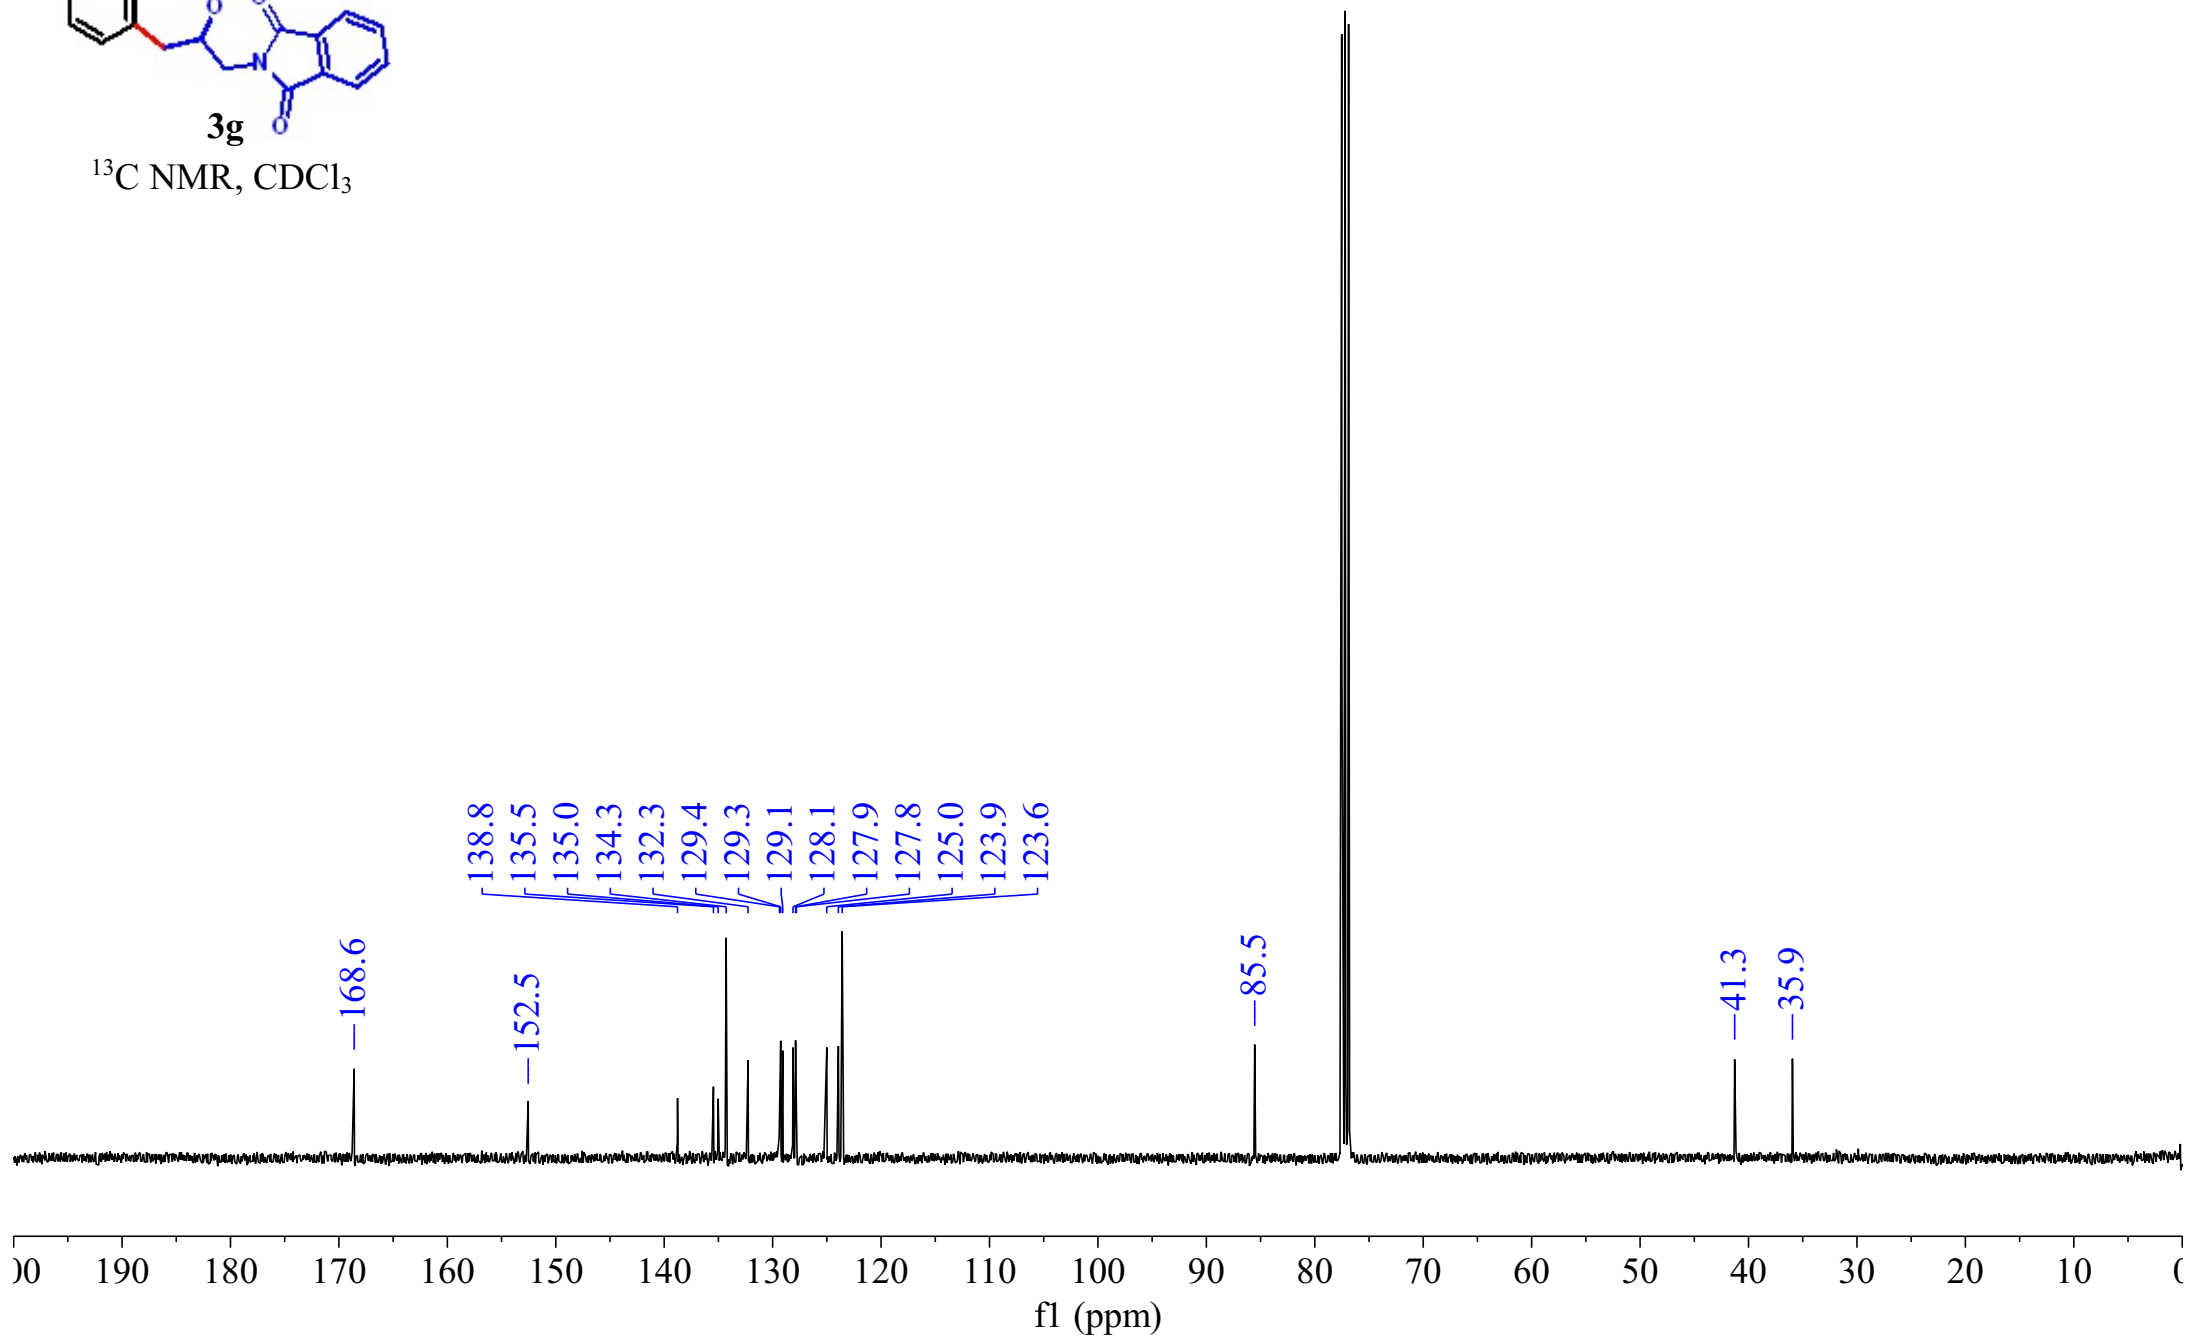

szp-280-1

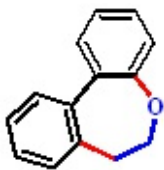

**3h**

$^1\text{H NMR}$ ,  $\text{CDCl}_3$

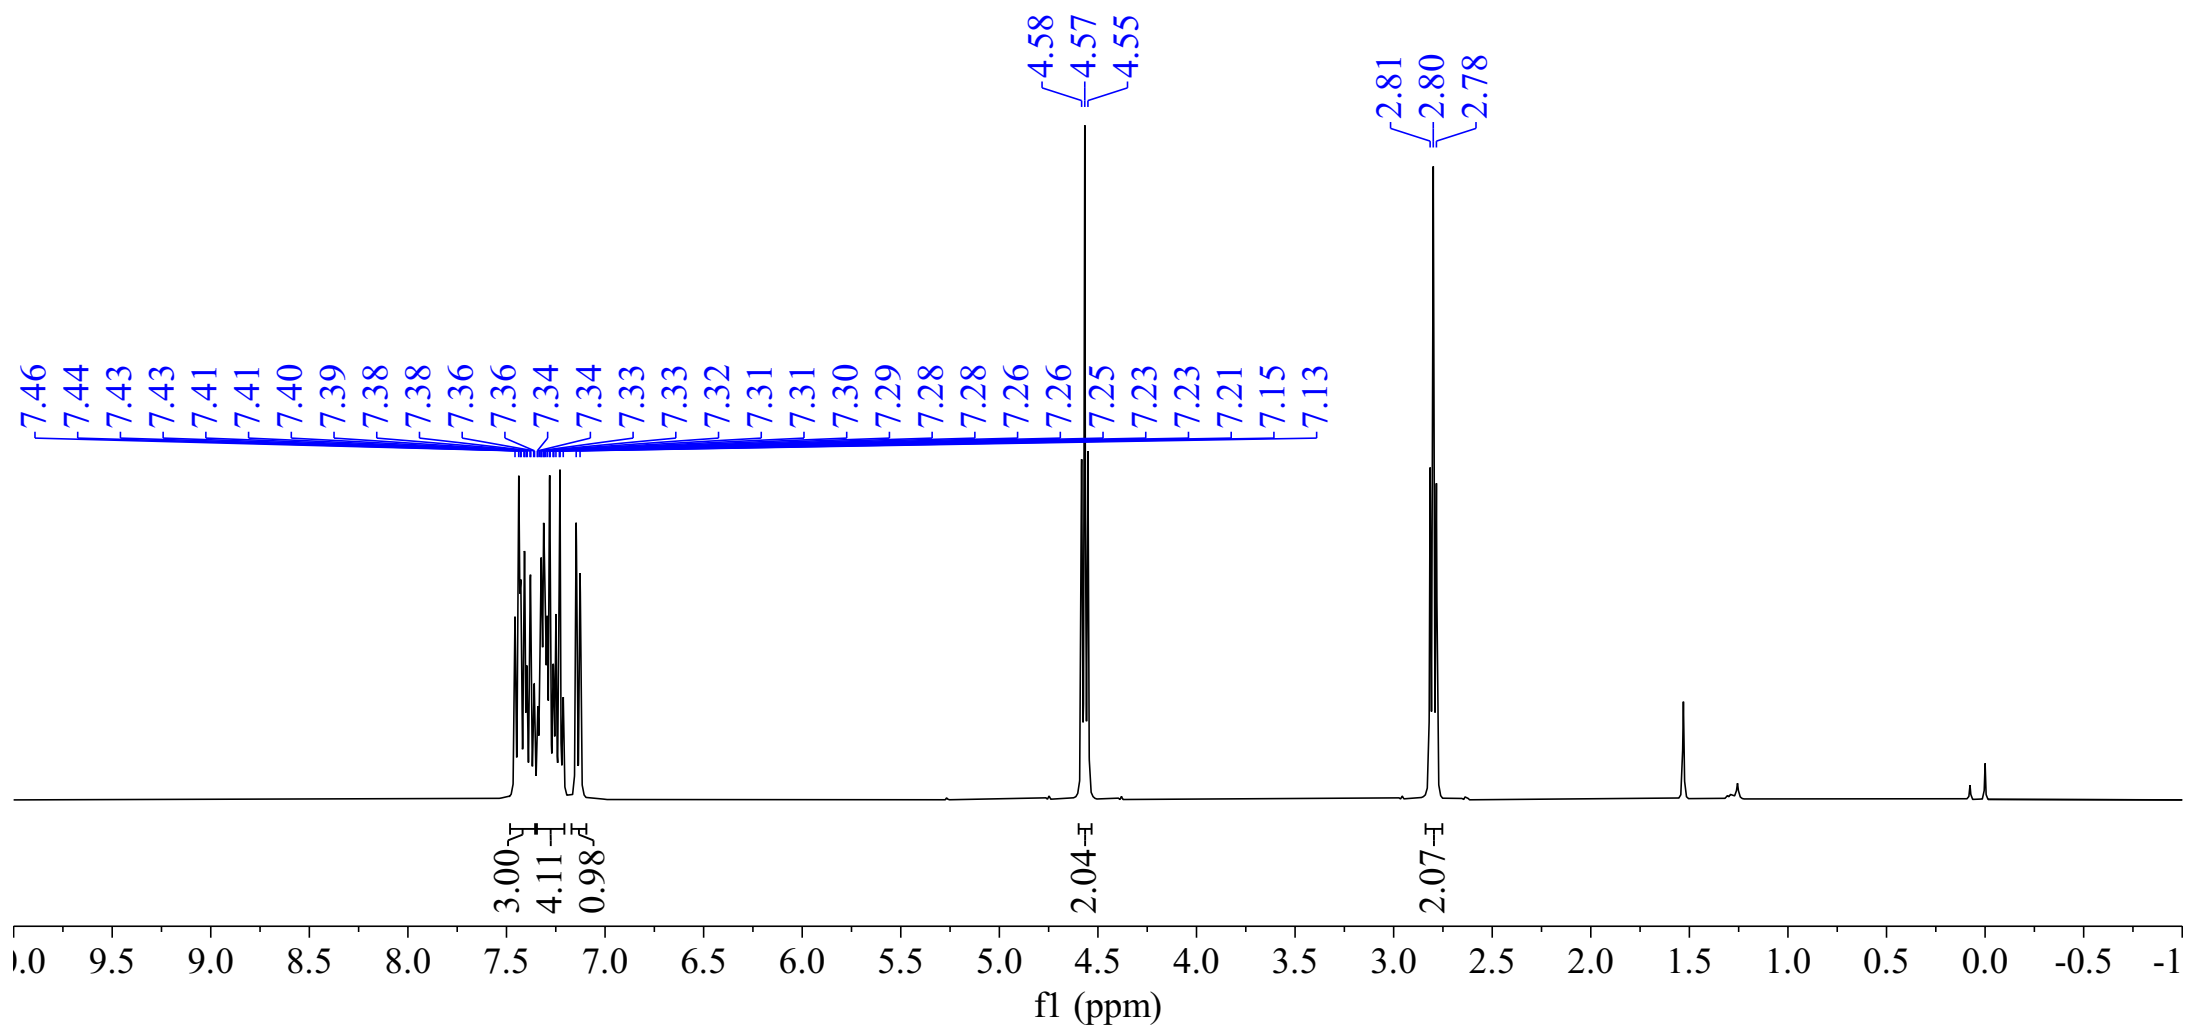

szp-280-1.2.fid

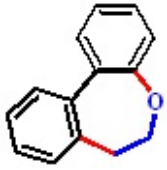

**3h**

$^{13}\text{C}$  NMR,  $\text{CDCl}_3$

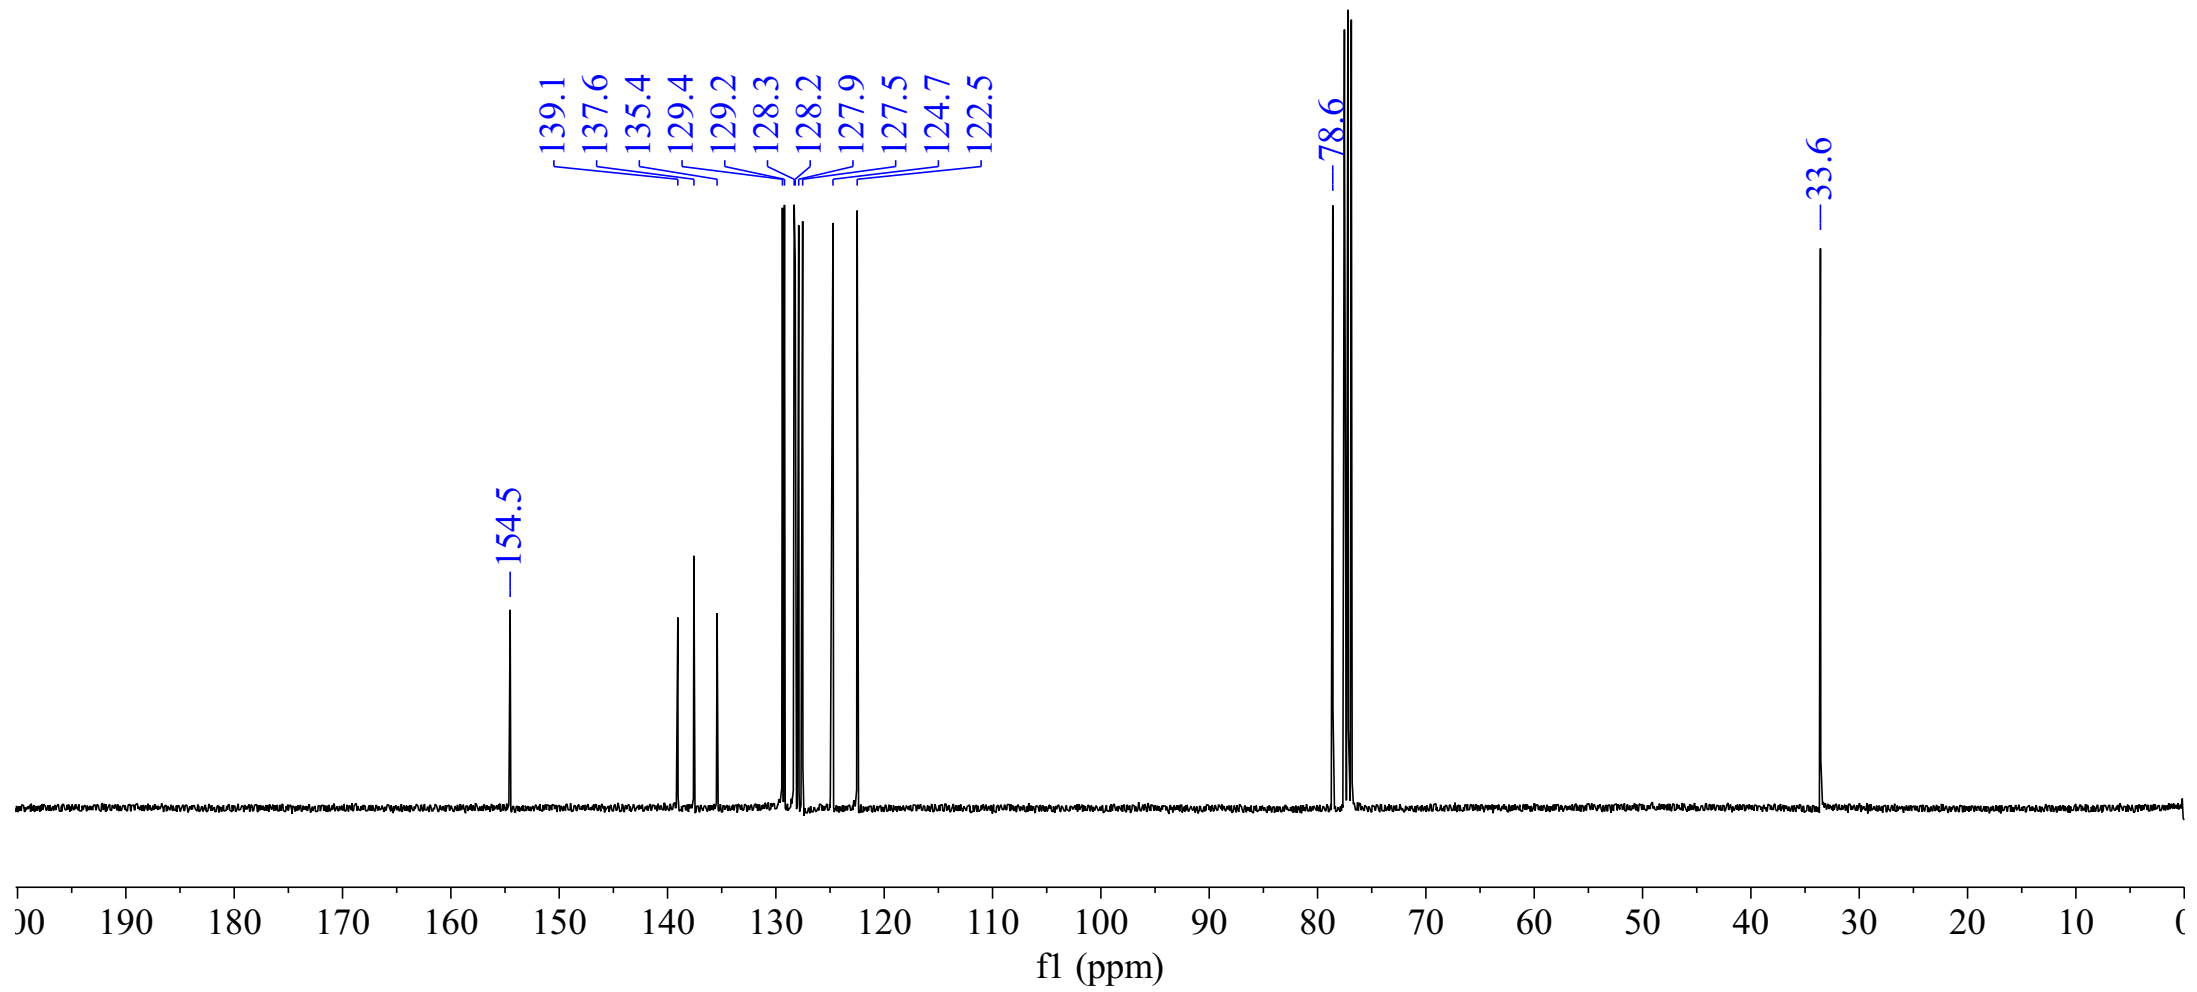

szp-3b1

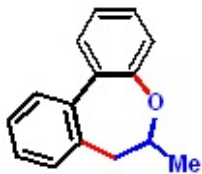

**3i**

$^1\text{H}$  NMR,  $\text{CDCl}_3$

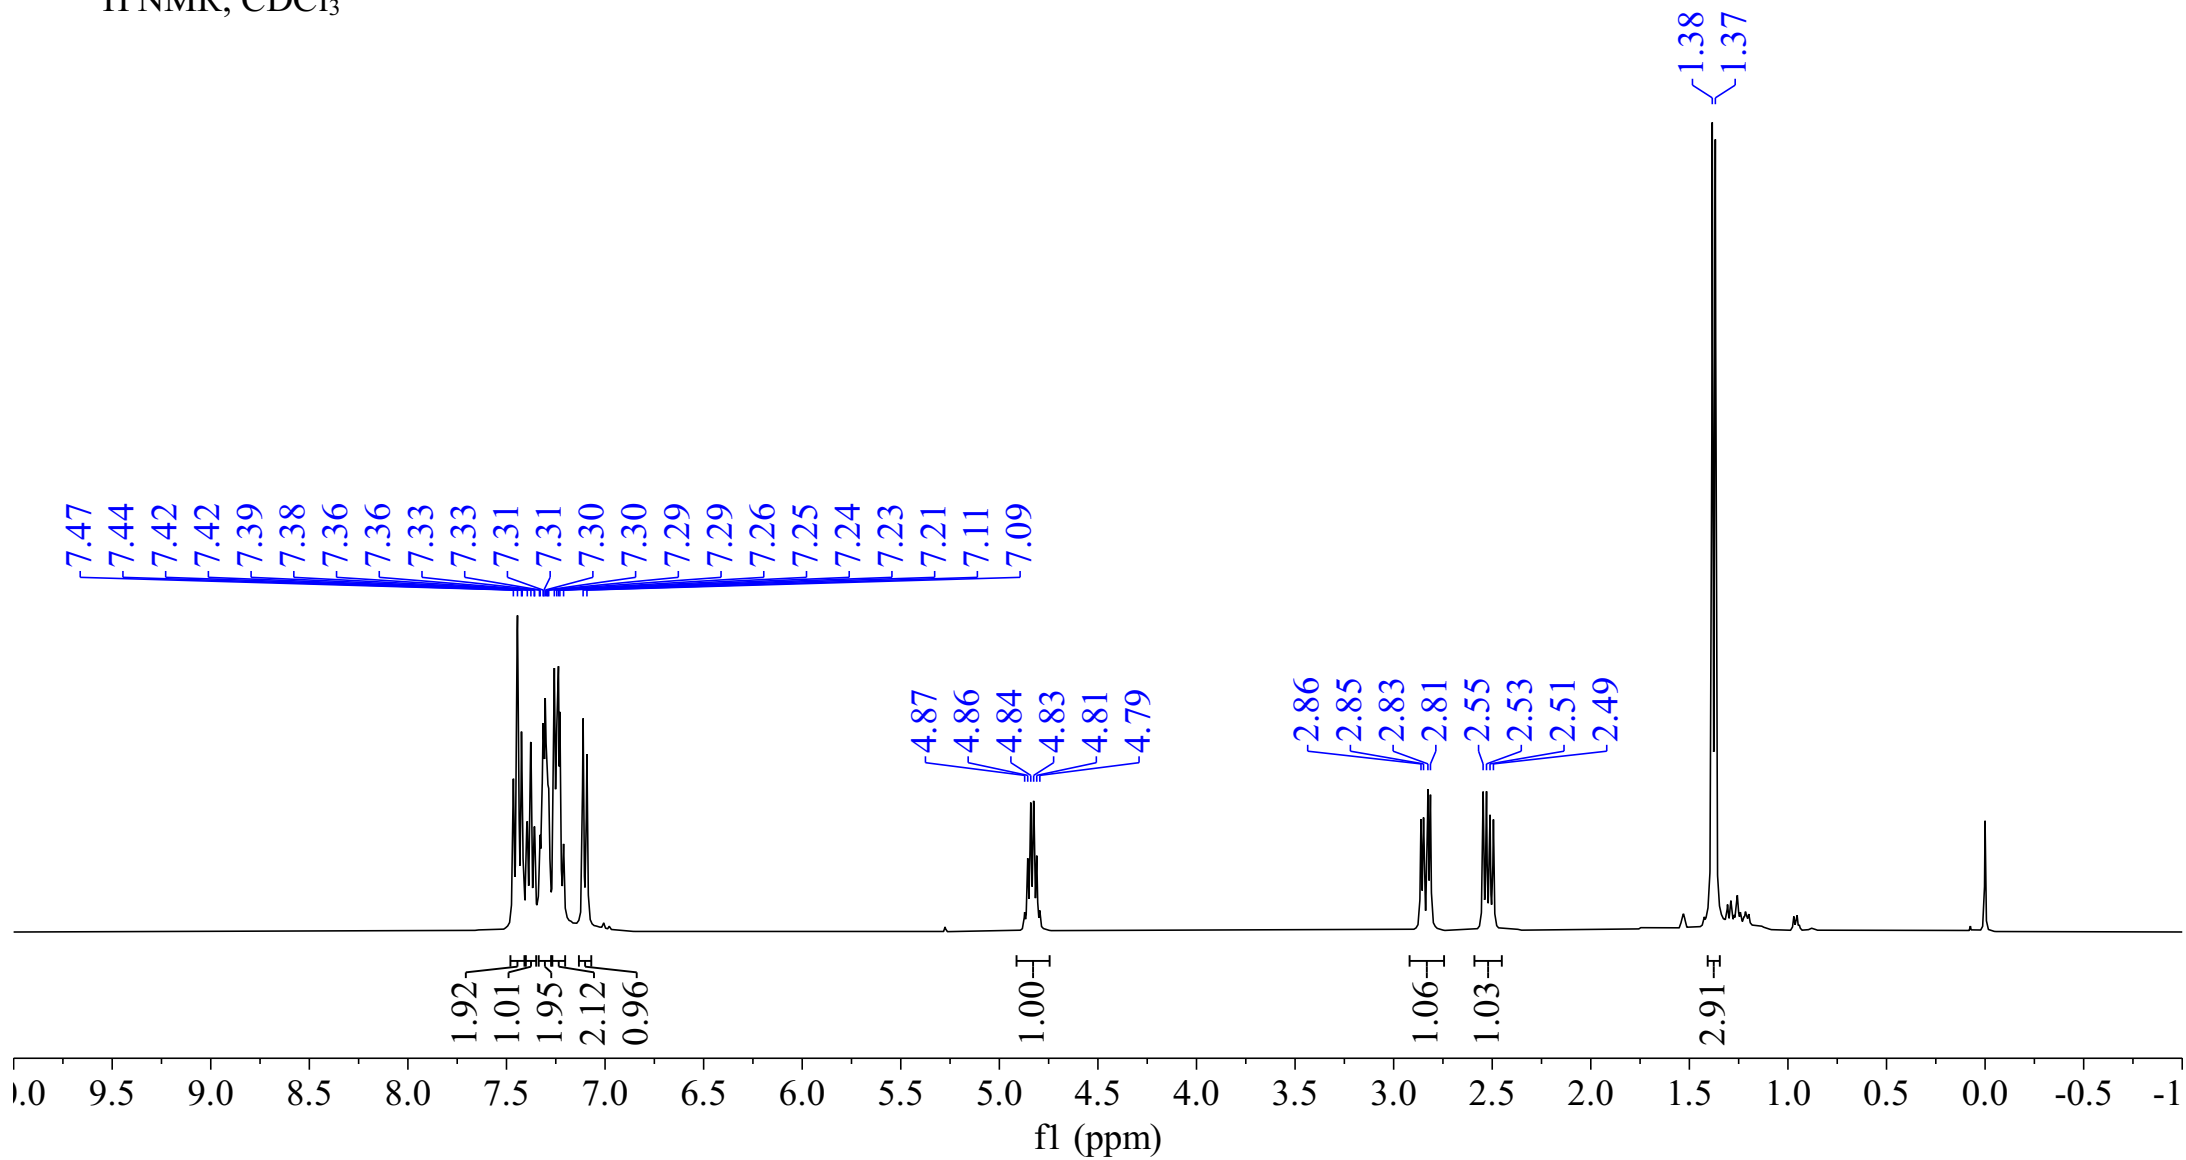

szp-3b1.2.fid

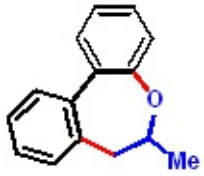

**3i**

$^{13}\text{C}$  NMR,  $\text{CDCl}_3$

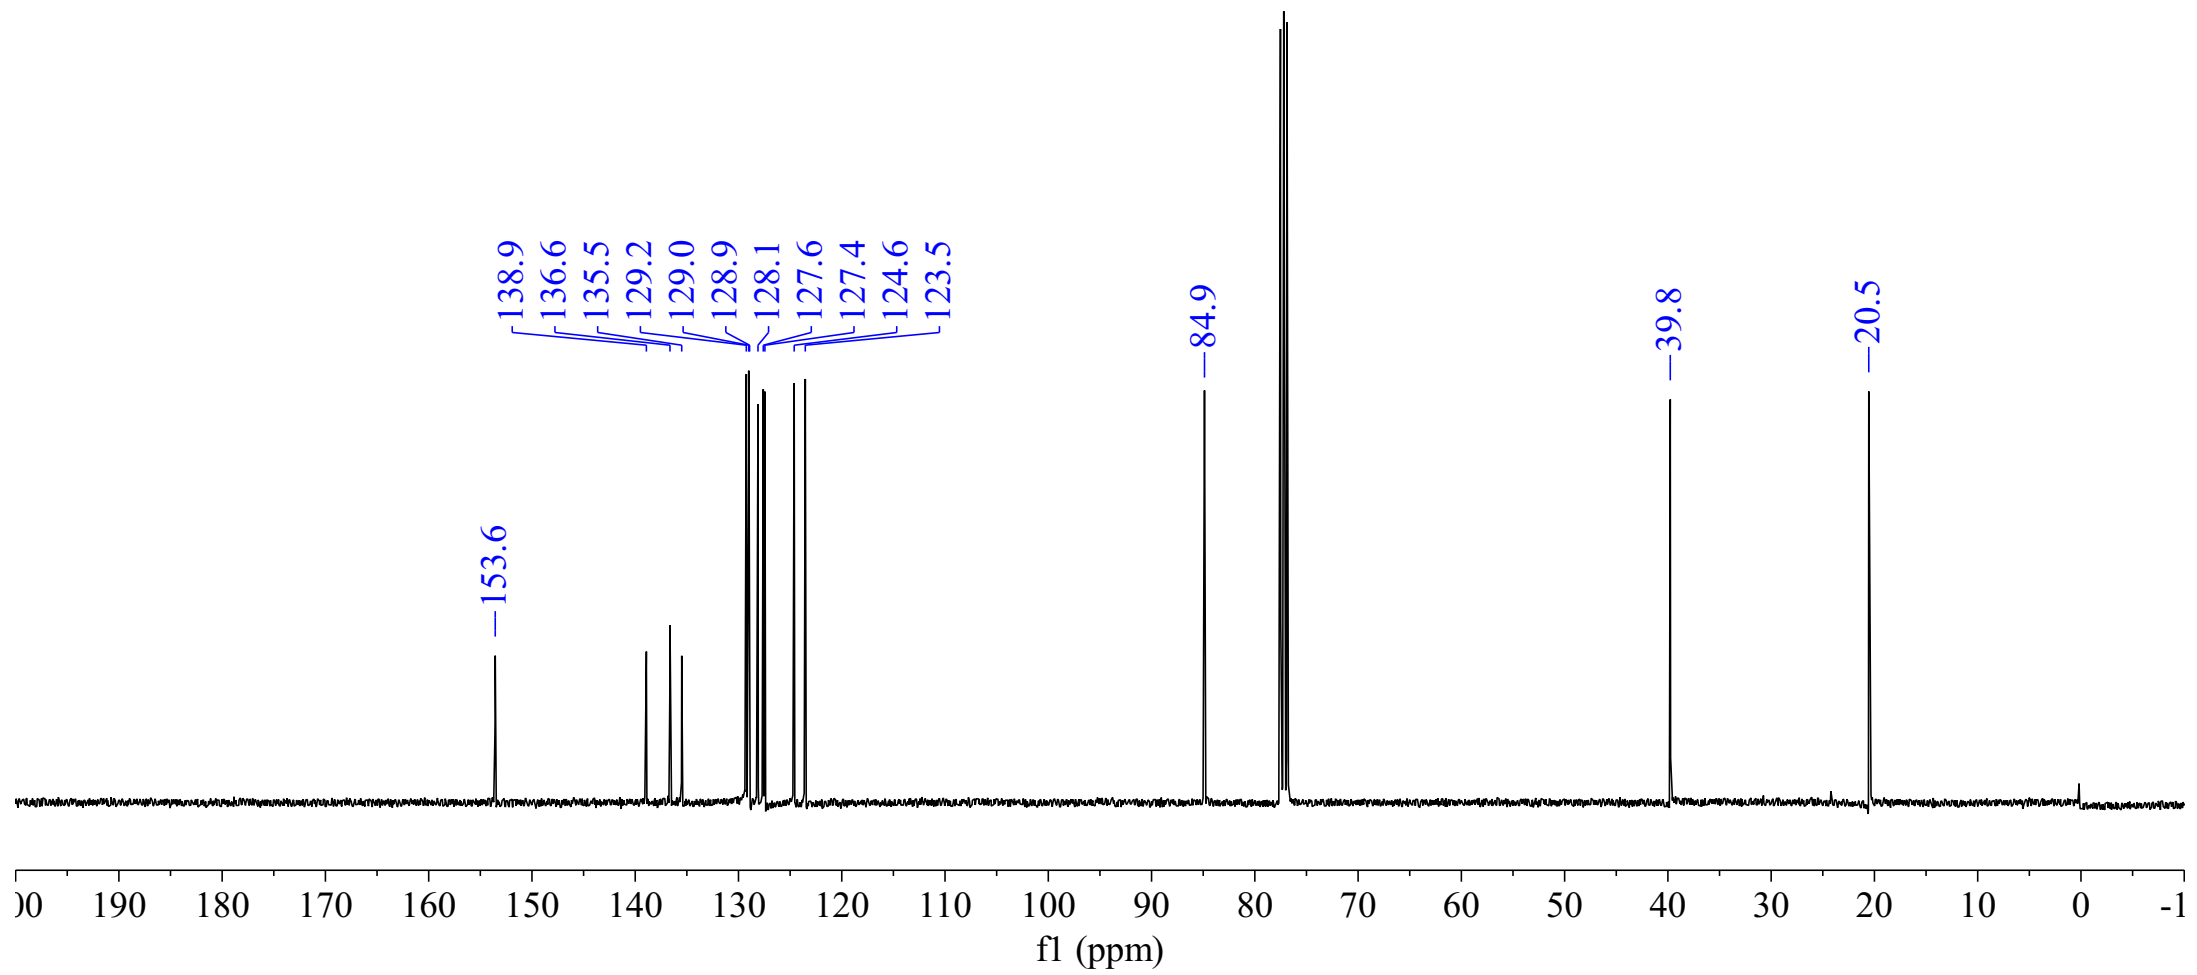



szp-3o

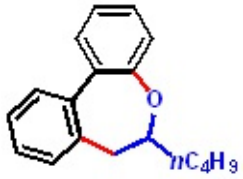

3j

$^1\text{H NMR}$ ,  $\text{CDCl}_3$

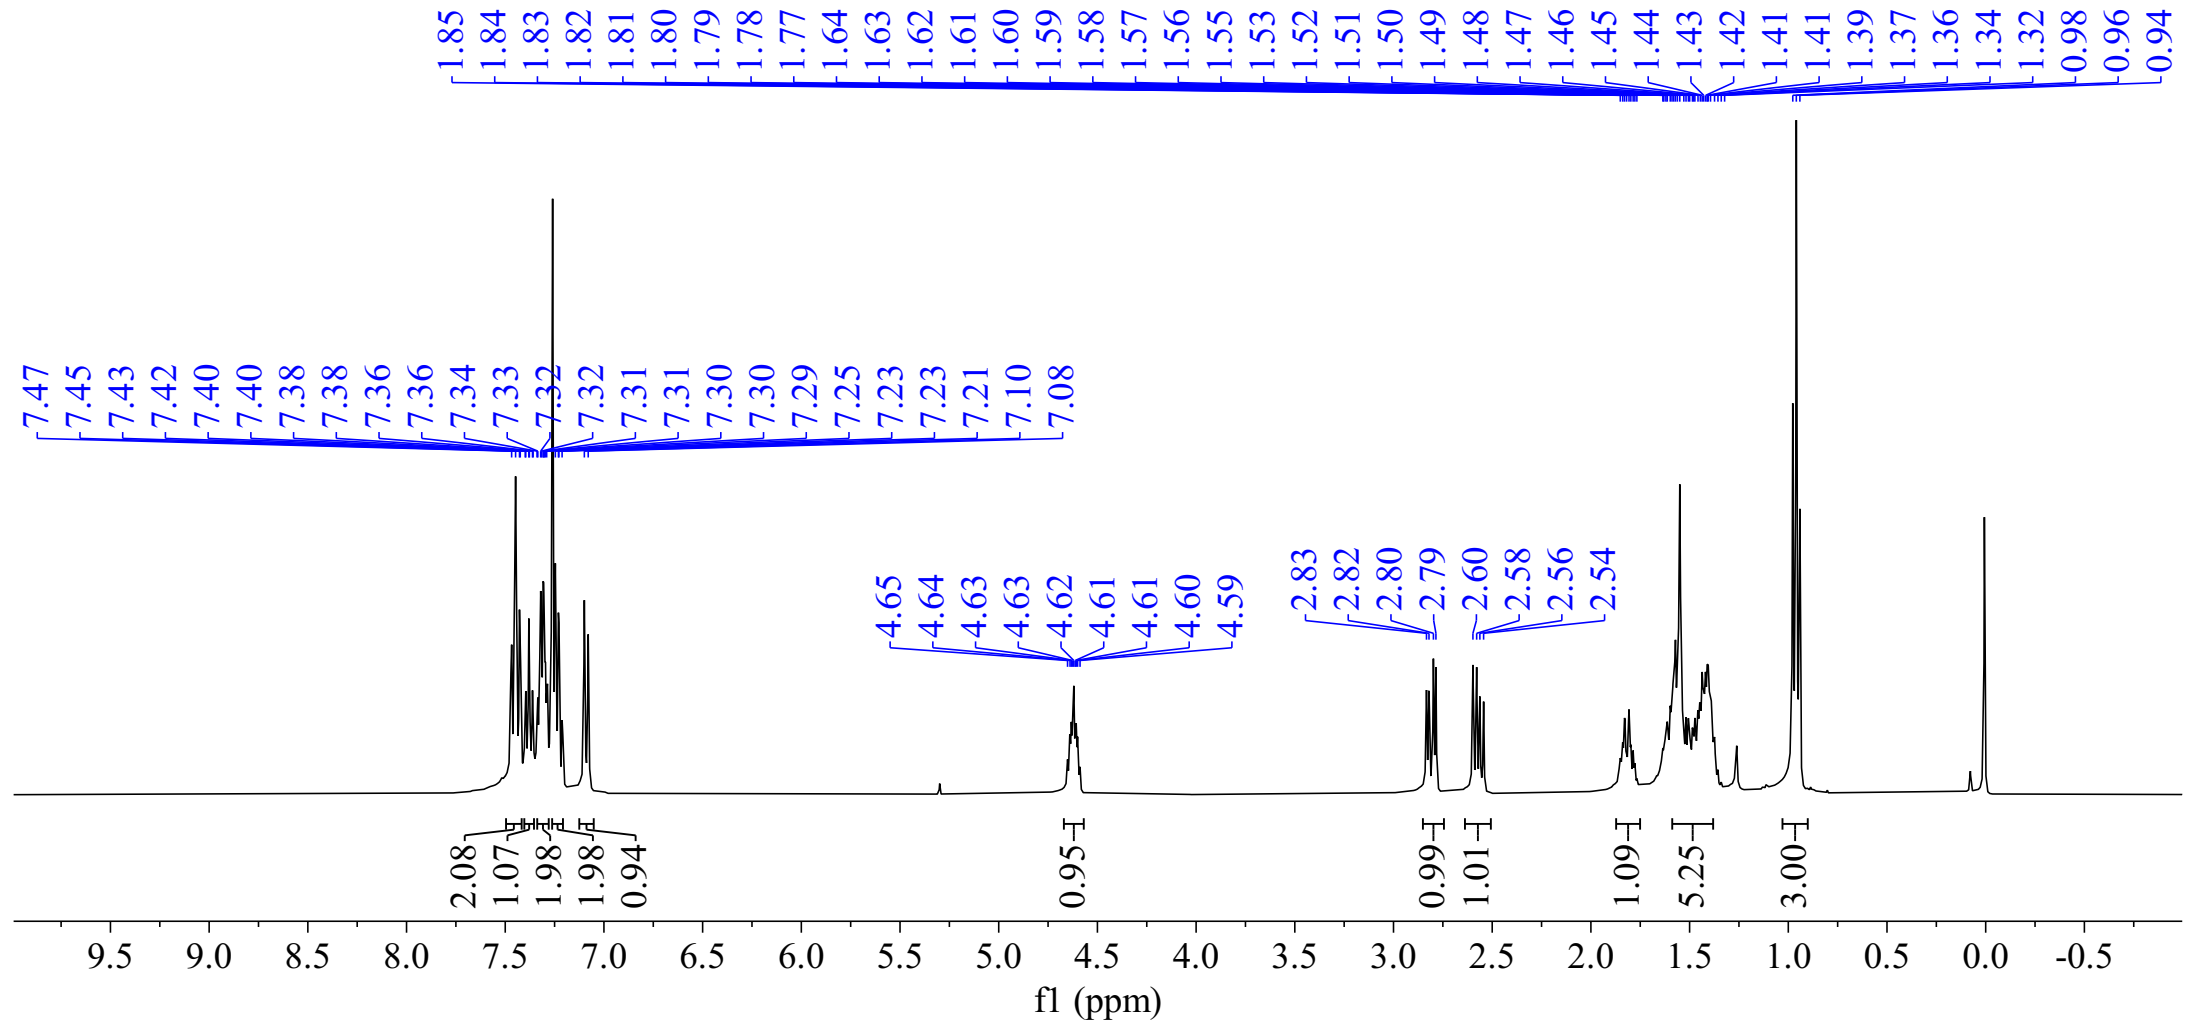

szp-3o.2.fid

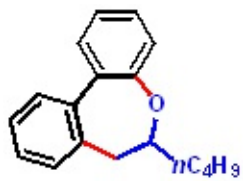

**3j**

<sup>13</sup>C NMR, CDCl<sub>3</sub>

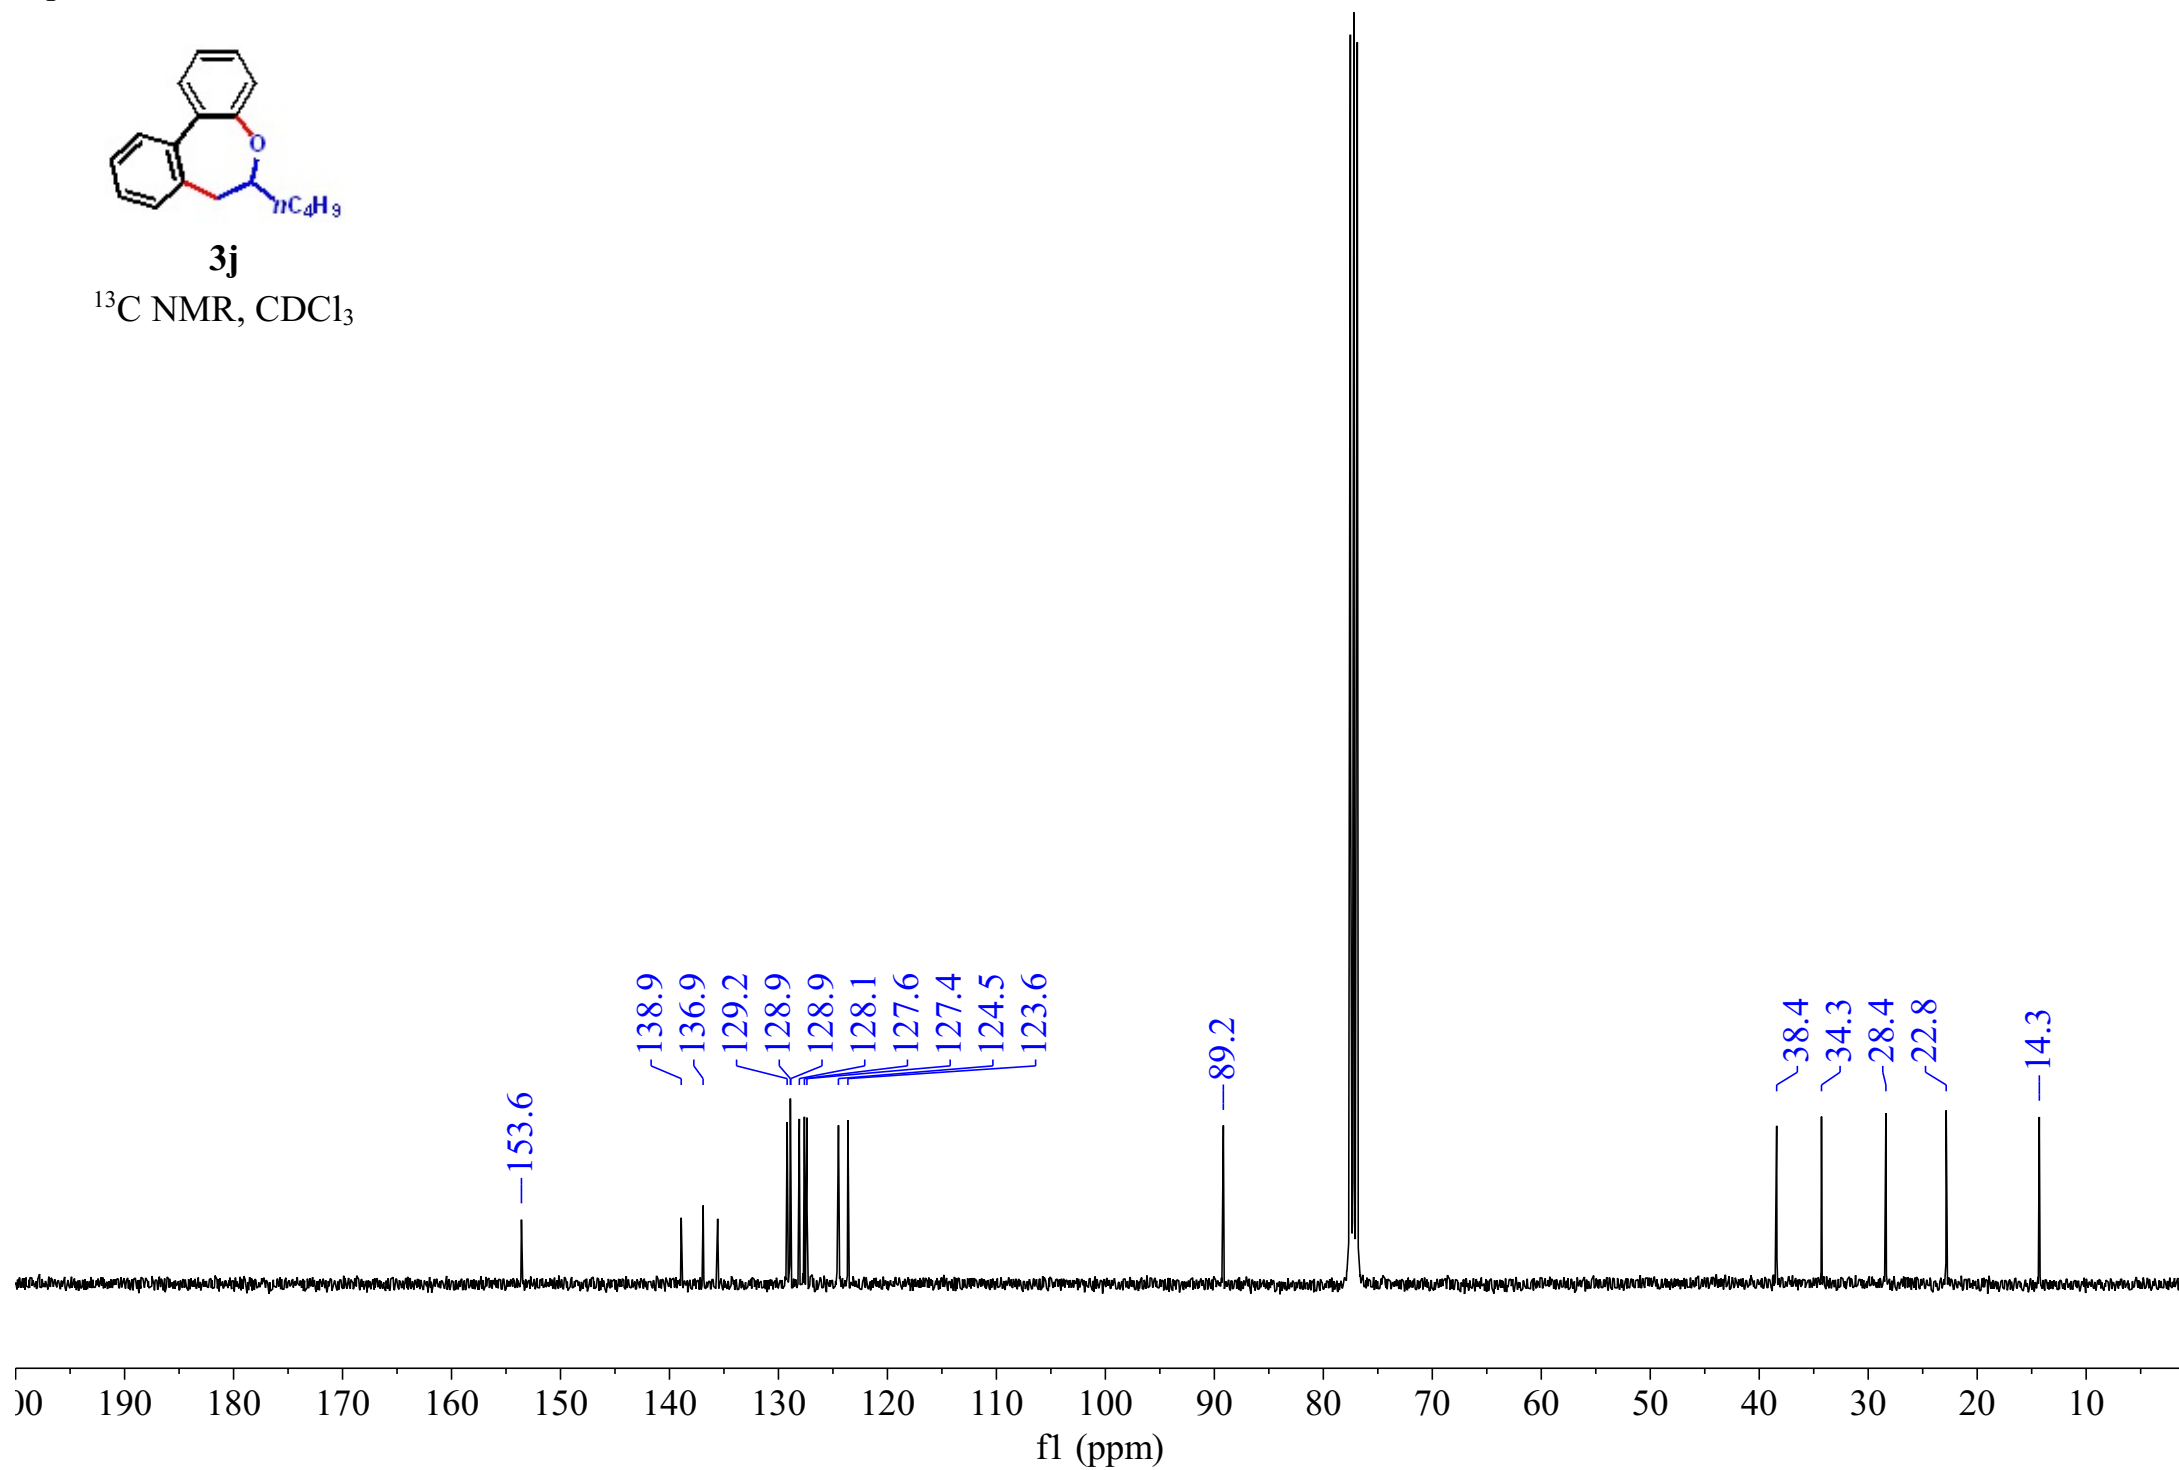

szp-235-4-3

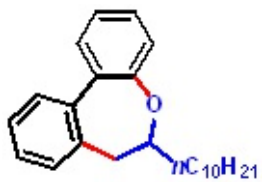

**3k**

$^1\text{H}$  NMR,  $\text{CDCl}_3$

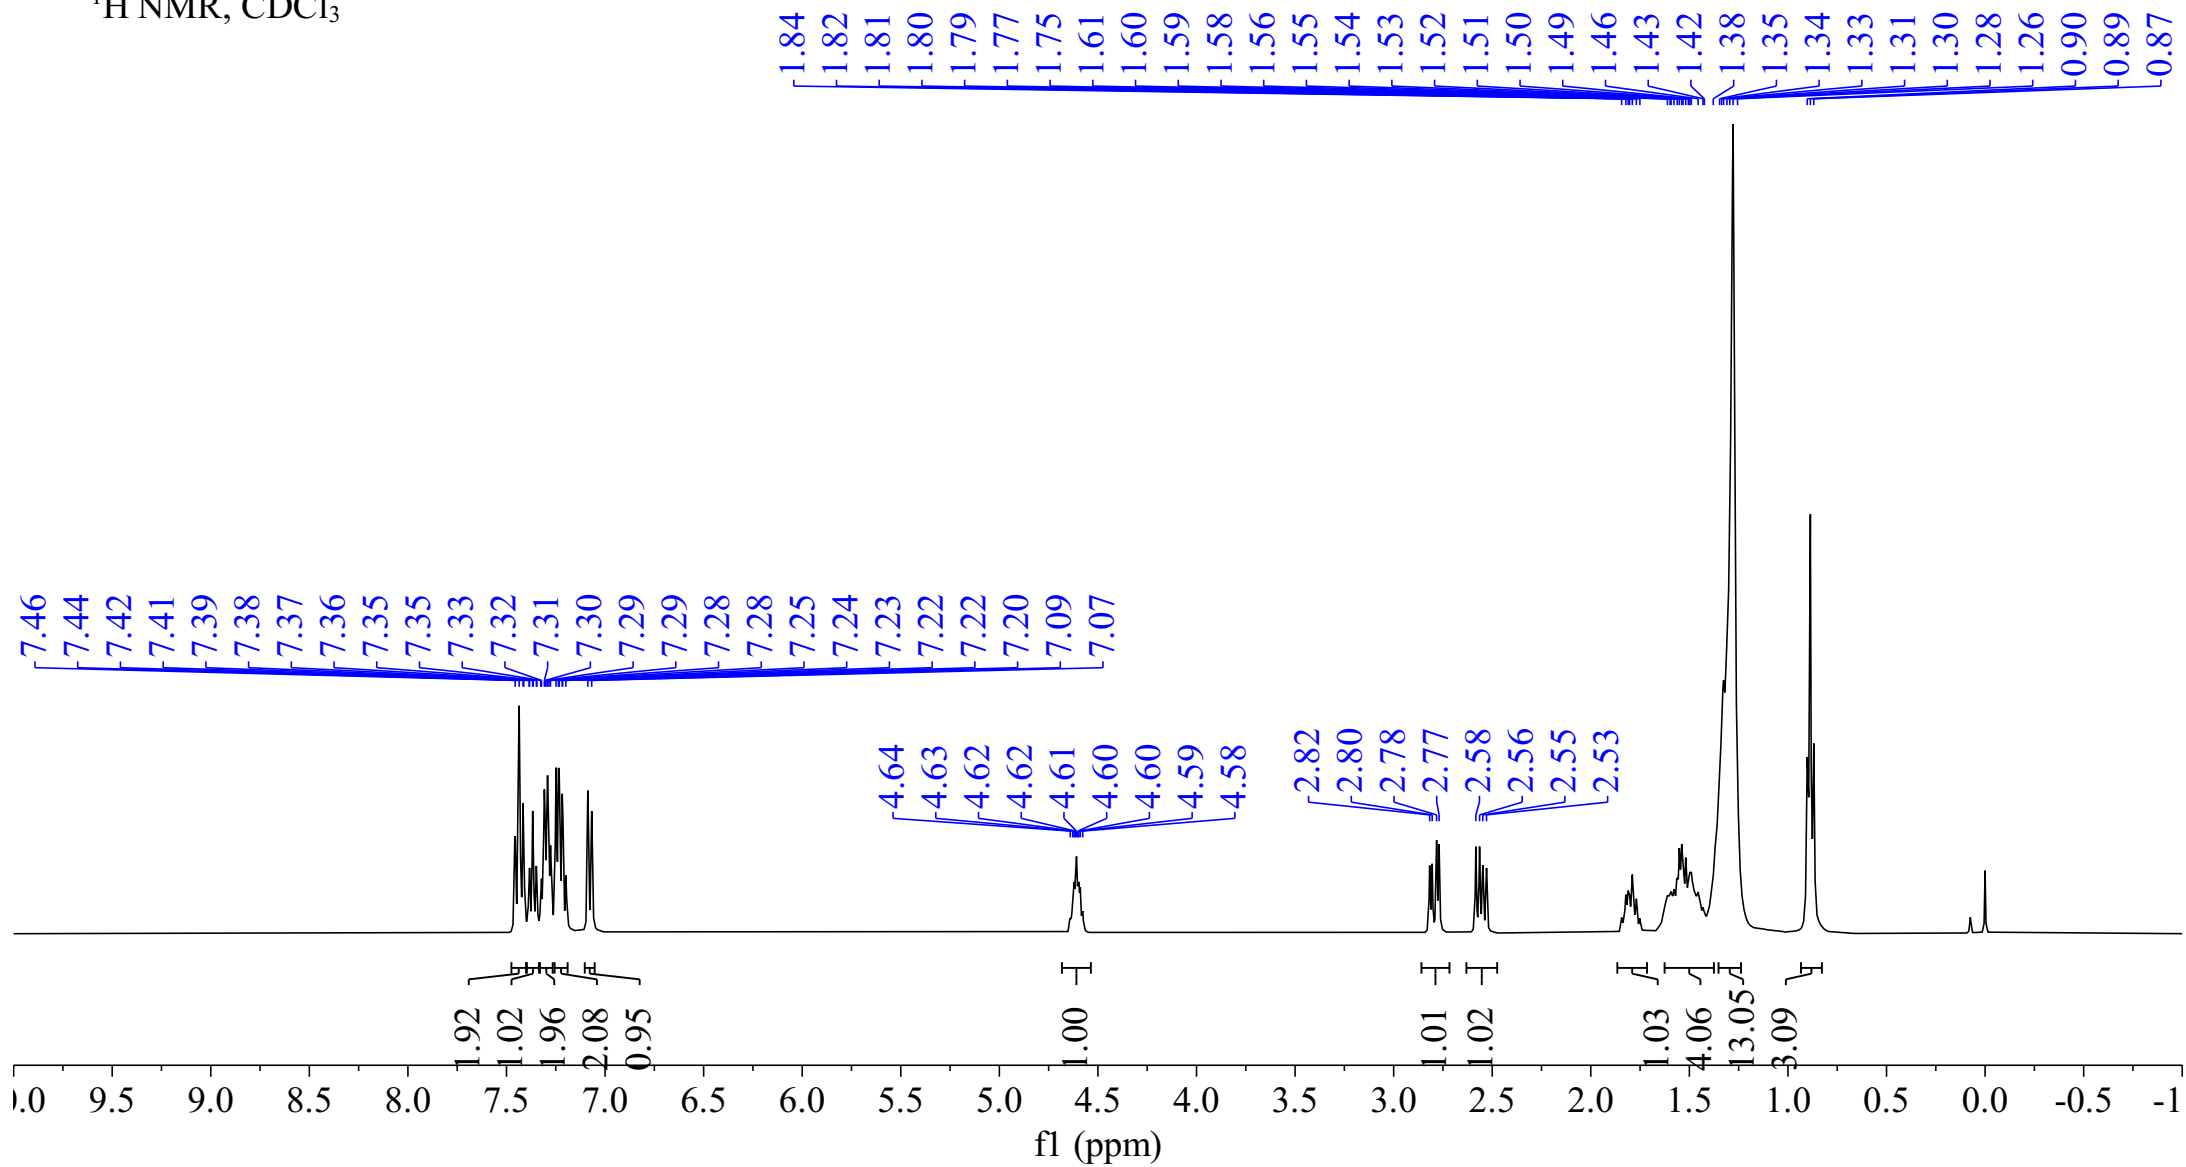

szp-235-4-3.2.fid

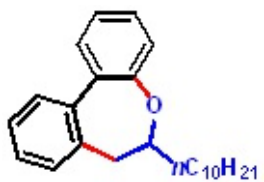

<sup>13</sup>C NMR, CDCl<sub>3</sub>

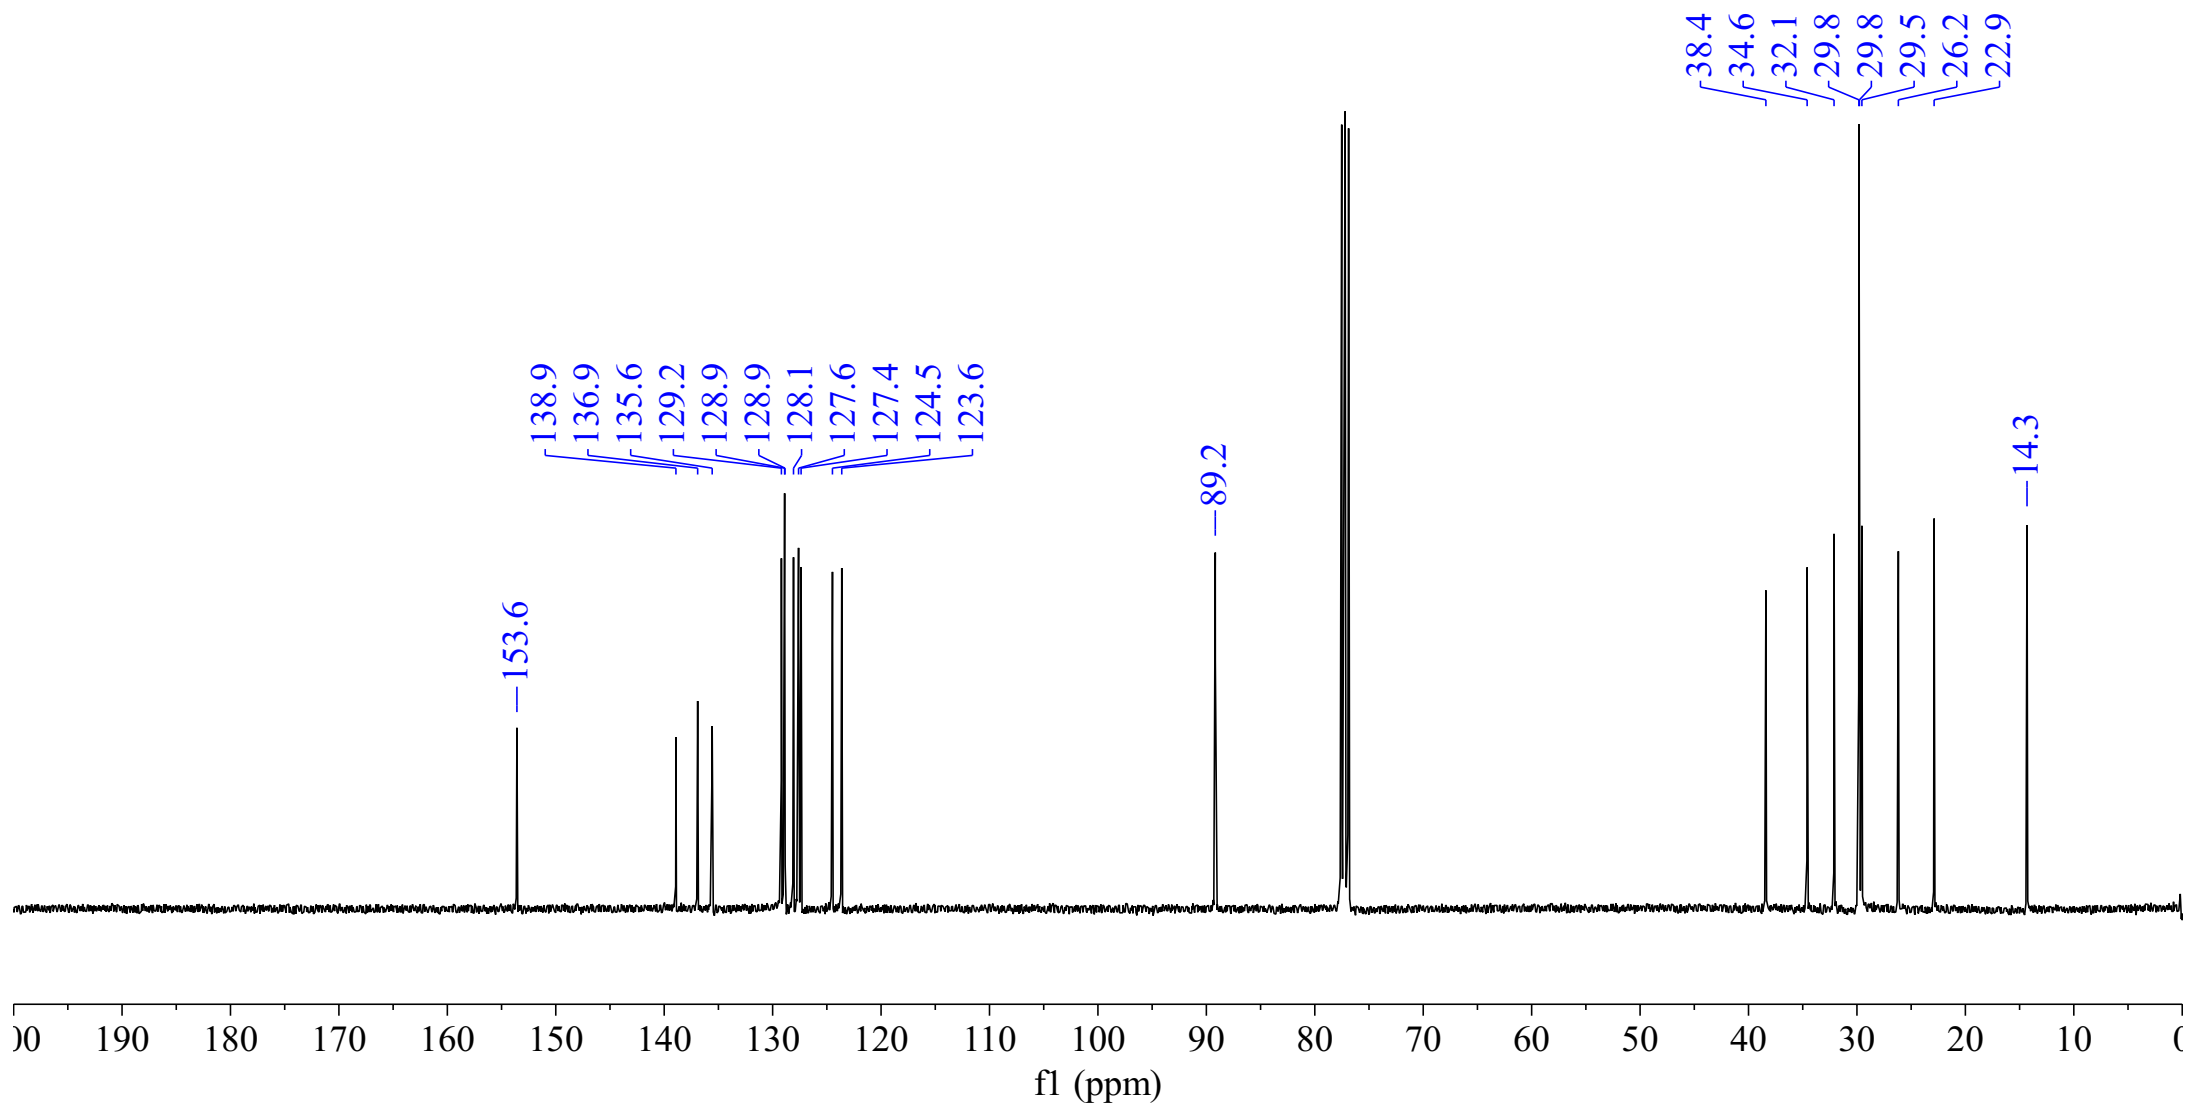

szp-235-5

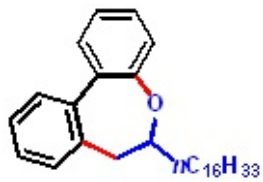

**31**

<sup>1</sup>H NMR, CDCl<sub>3</sub>

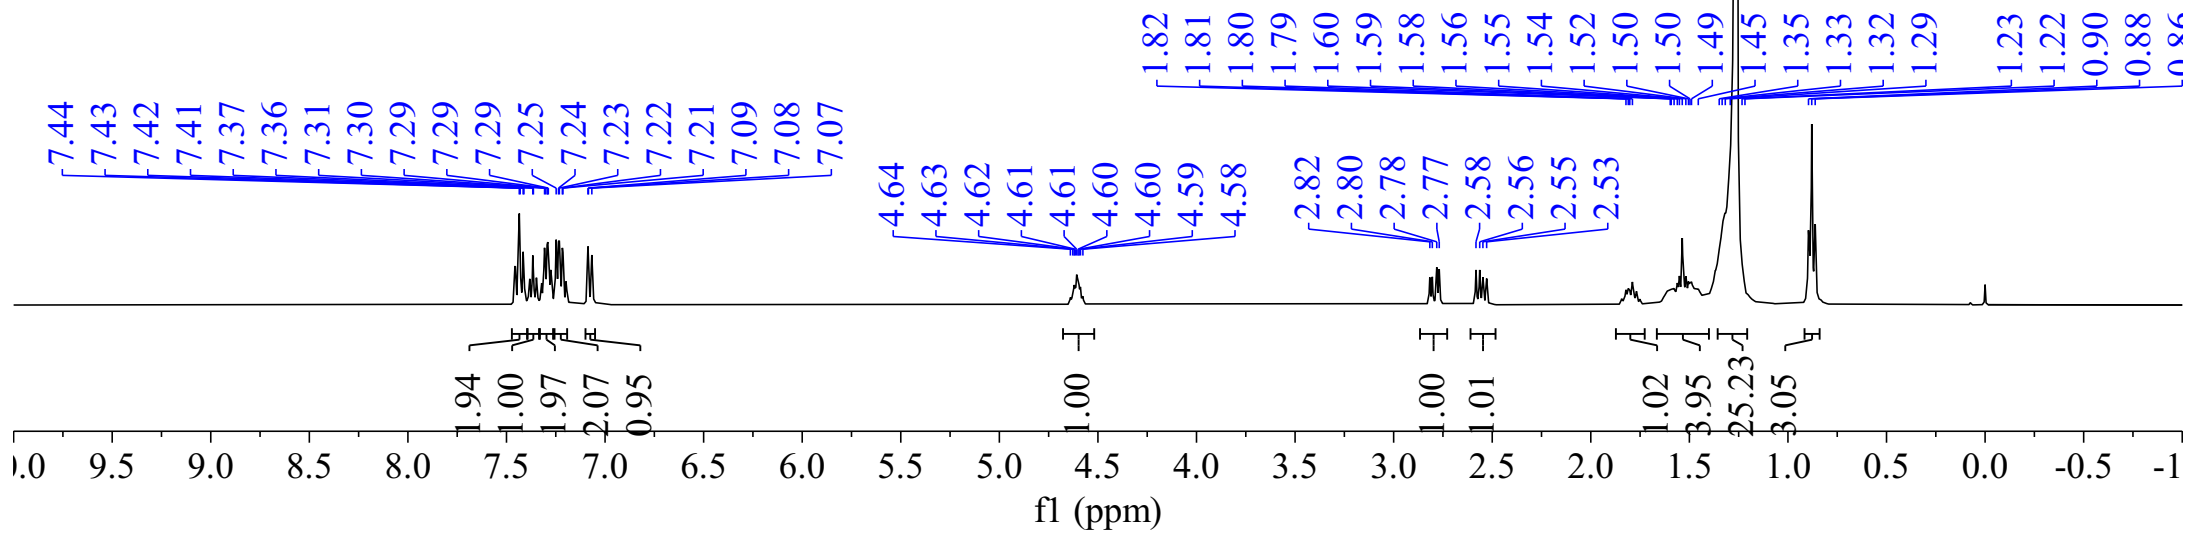

szp-235-5.2.fid

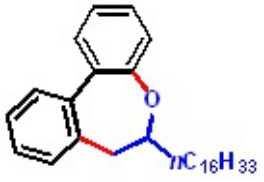

<sup>13</sup>C NMR, CDCl<sub>3</sub>

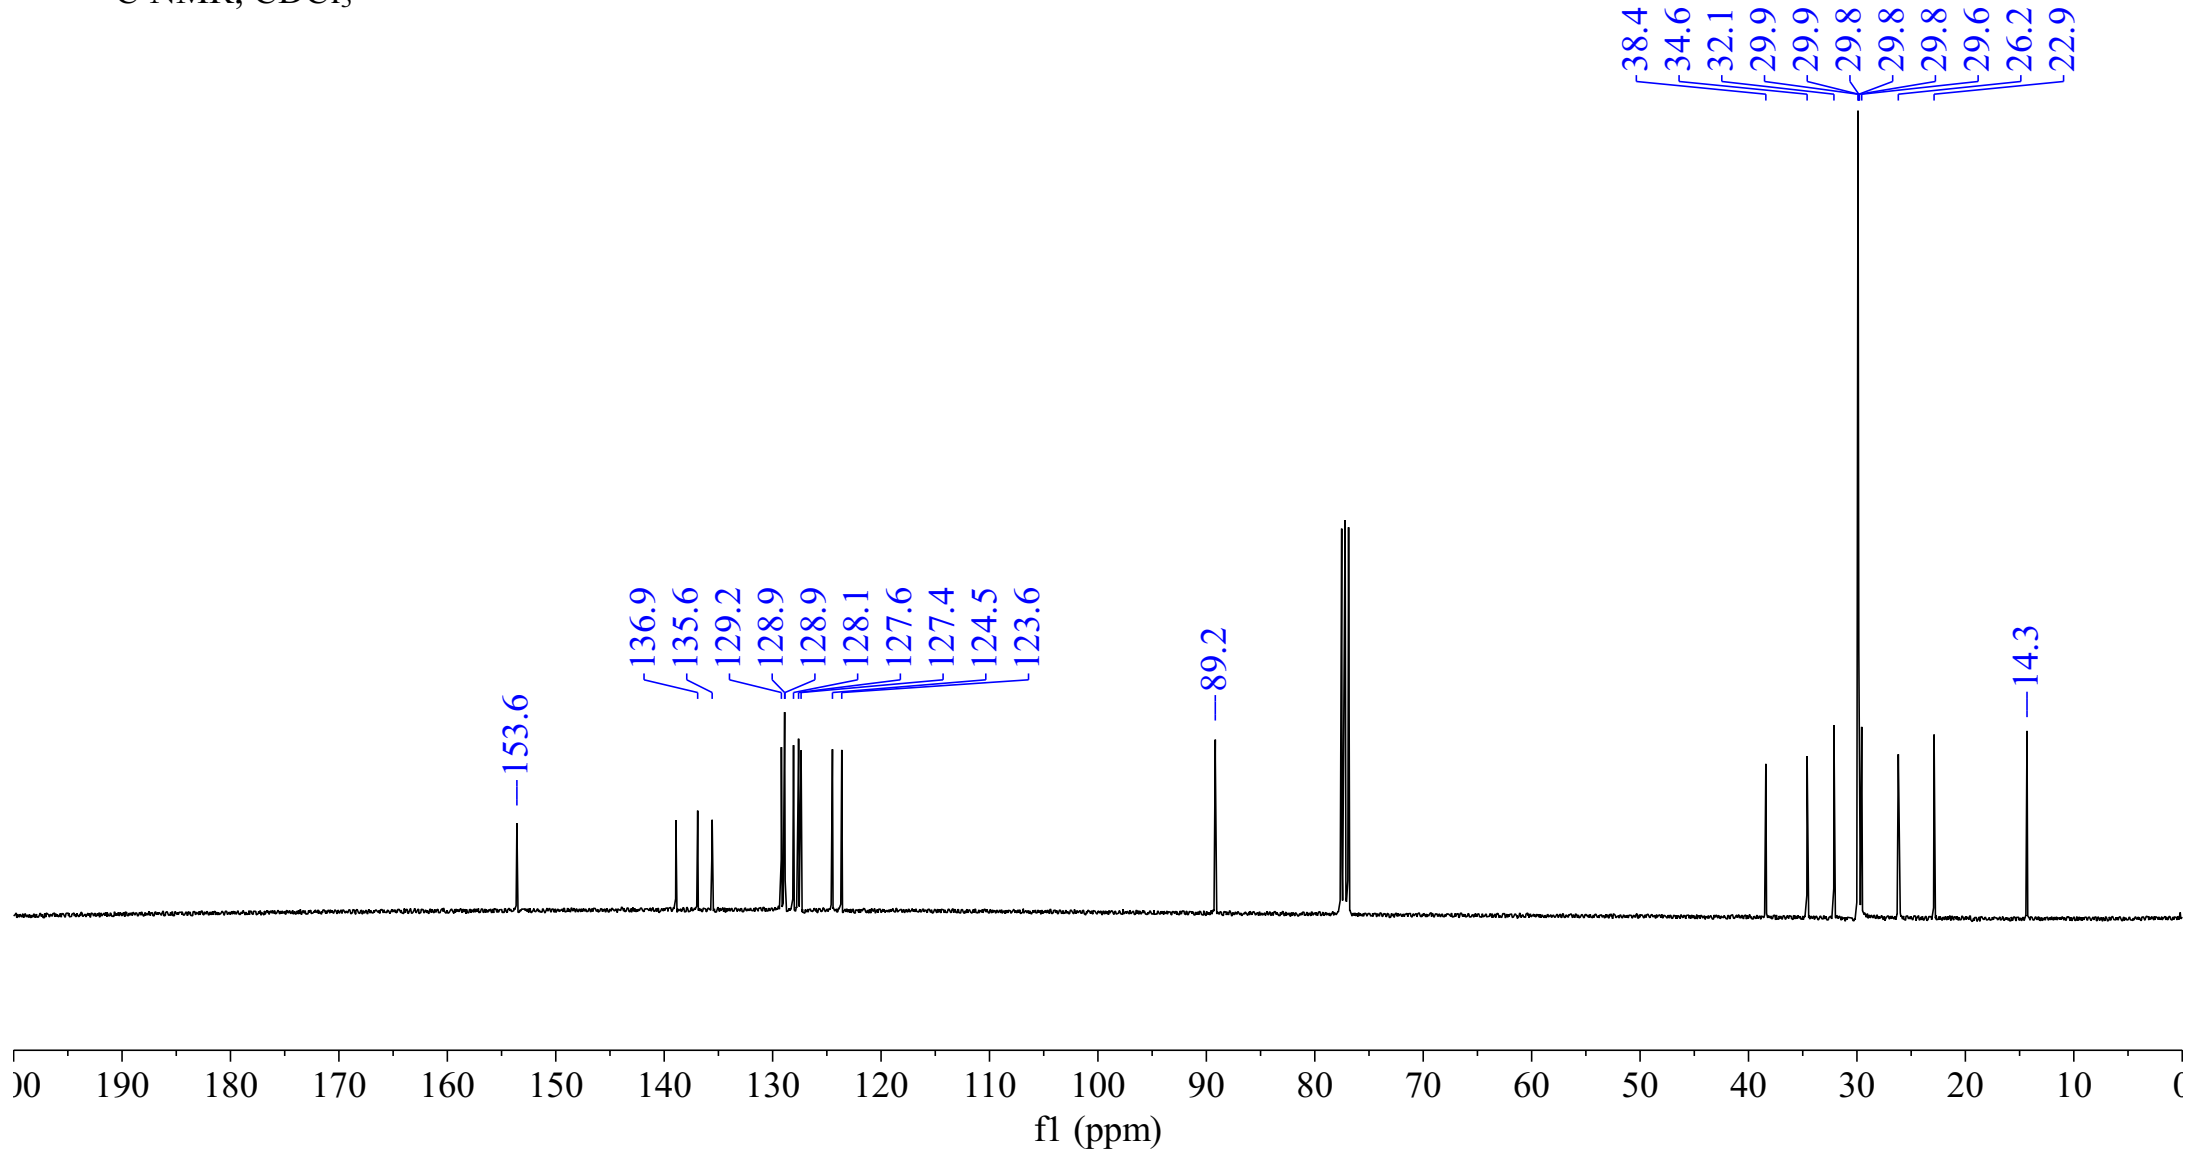

szp-249-1111

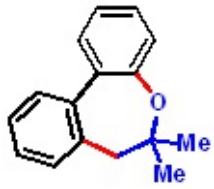

**3m**

$^1\text{H NMR}$ ,  $\text{CDCl}_3$

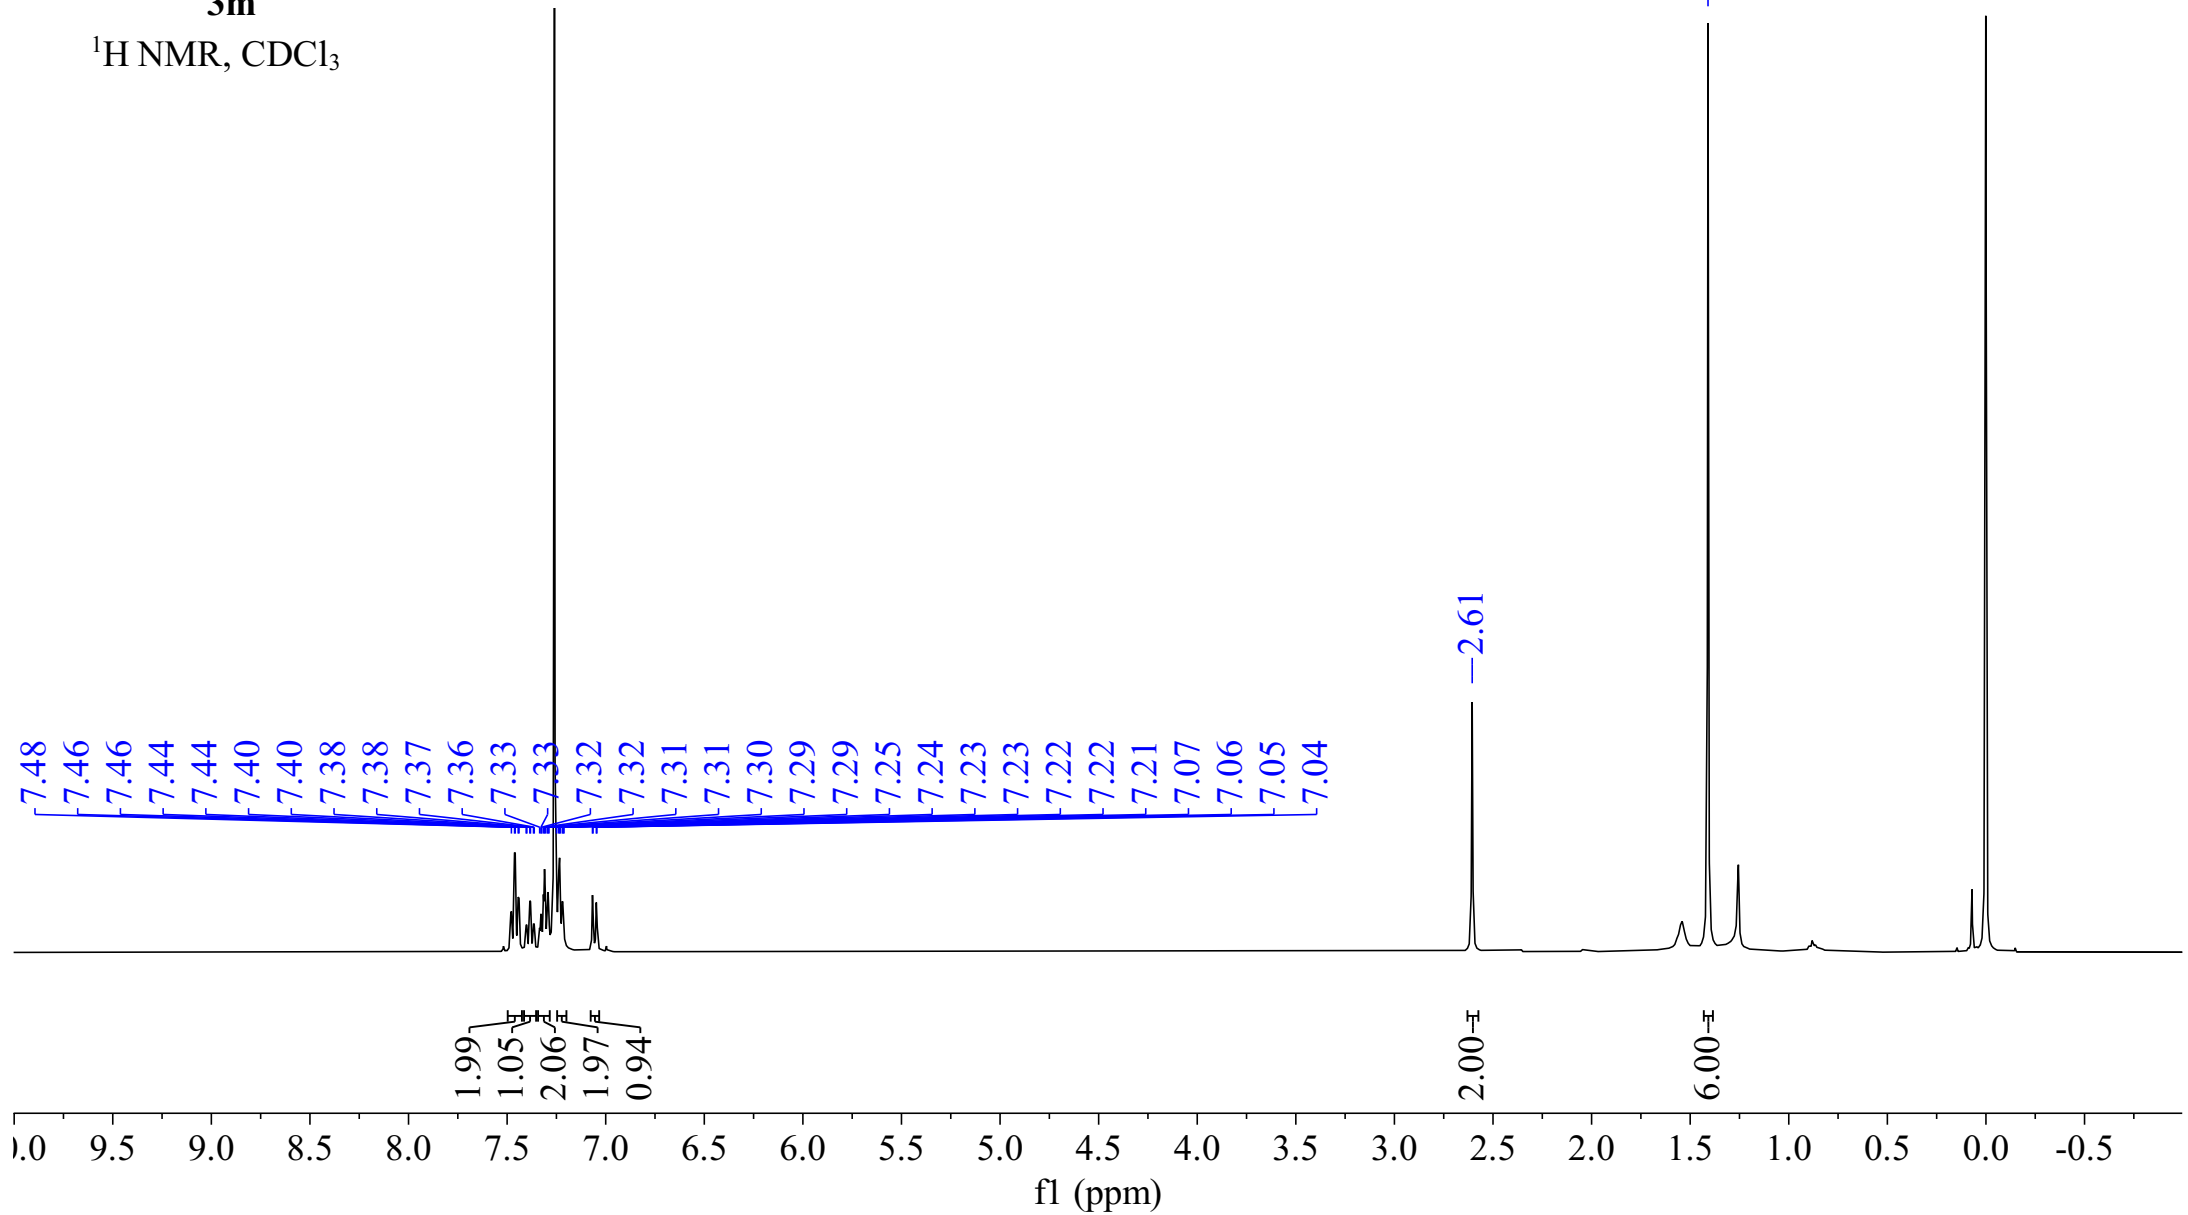

szp-249-1111.2.fid

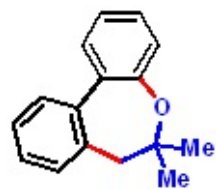

**3m**

$^{13}\text{C}$  NMR,  $\text{CDCl}_3$

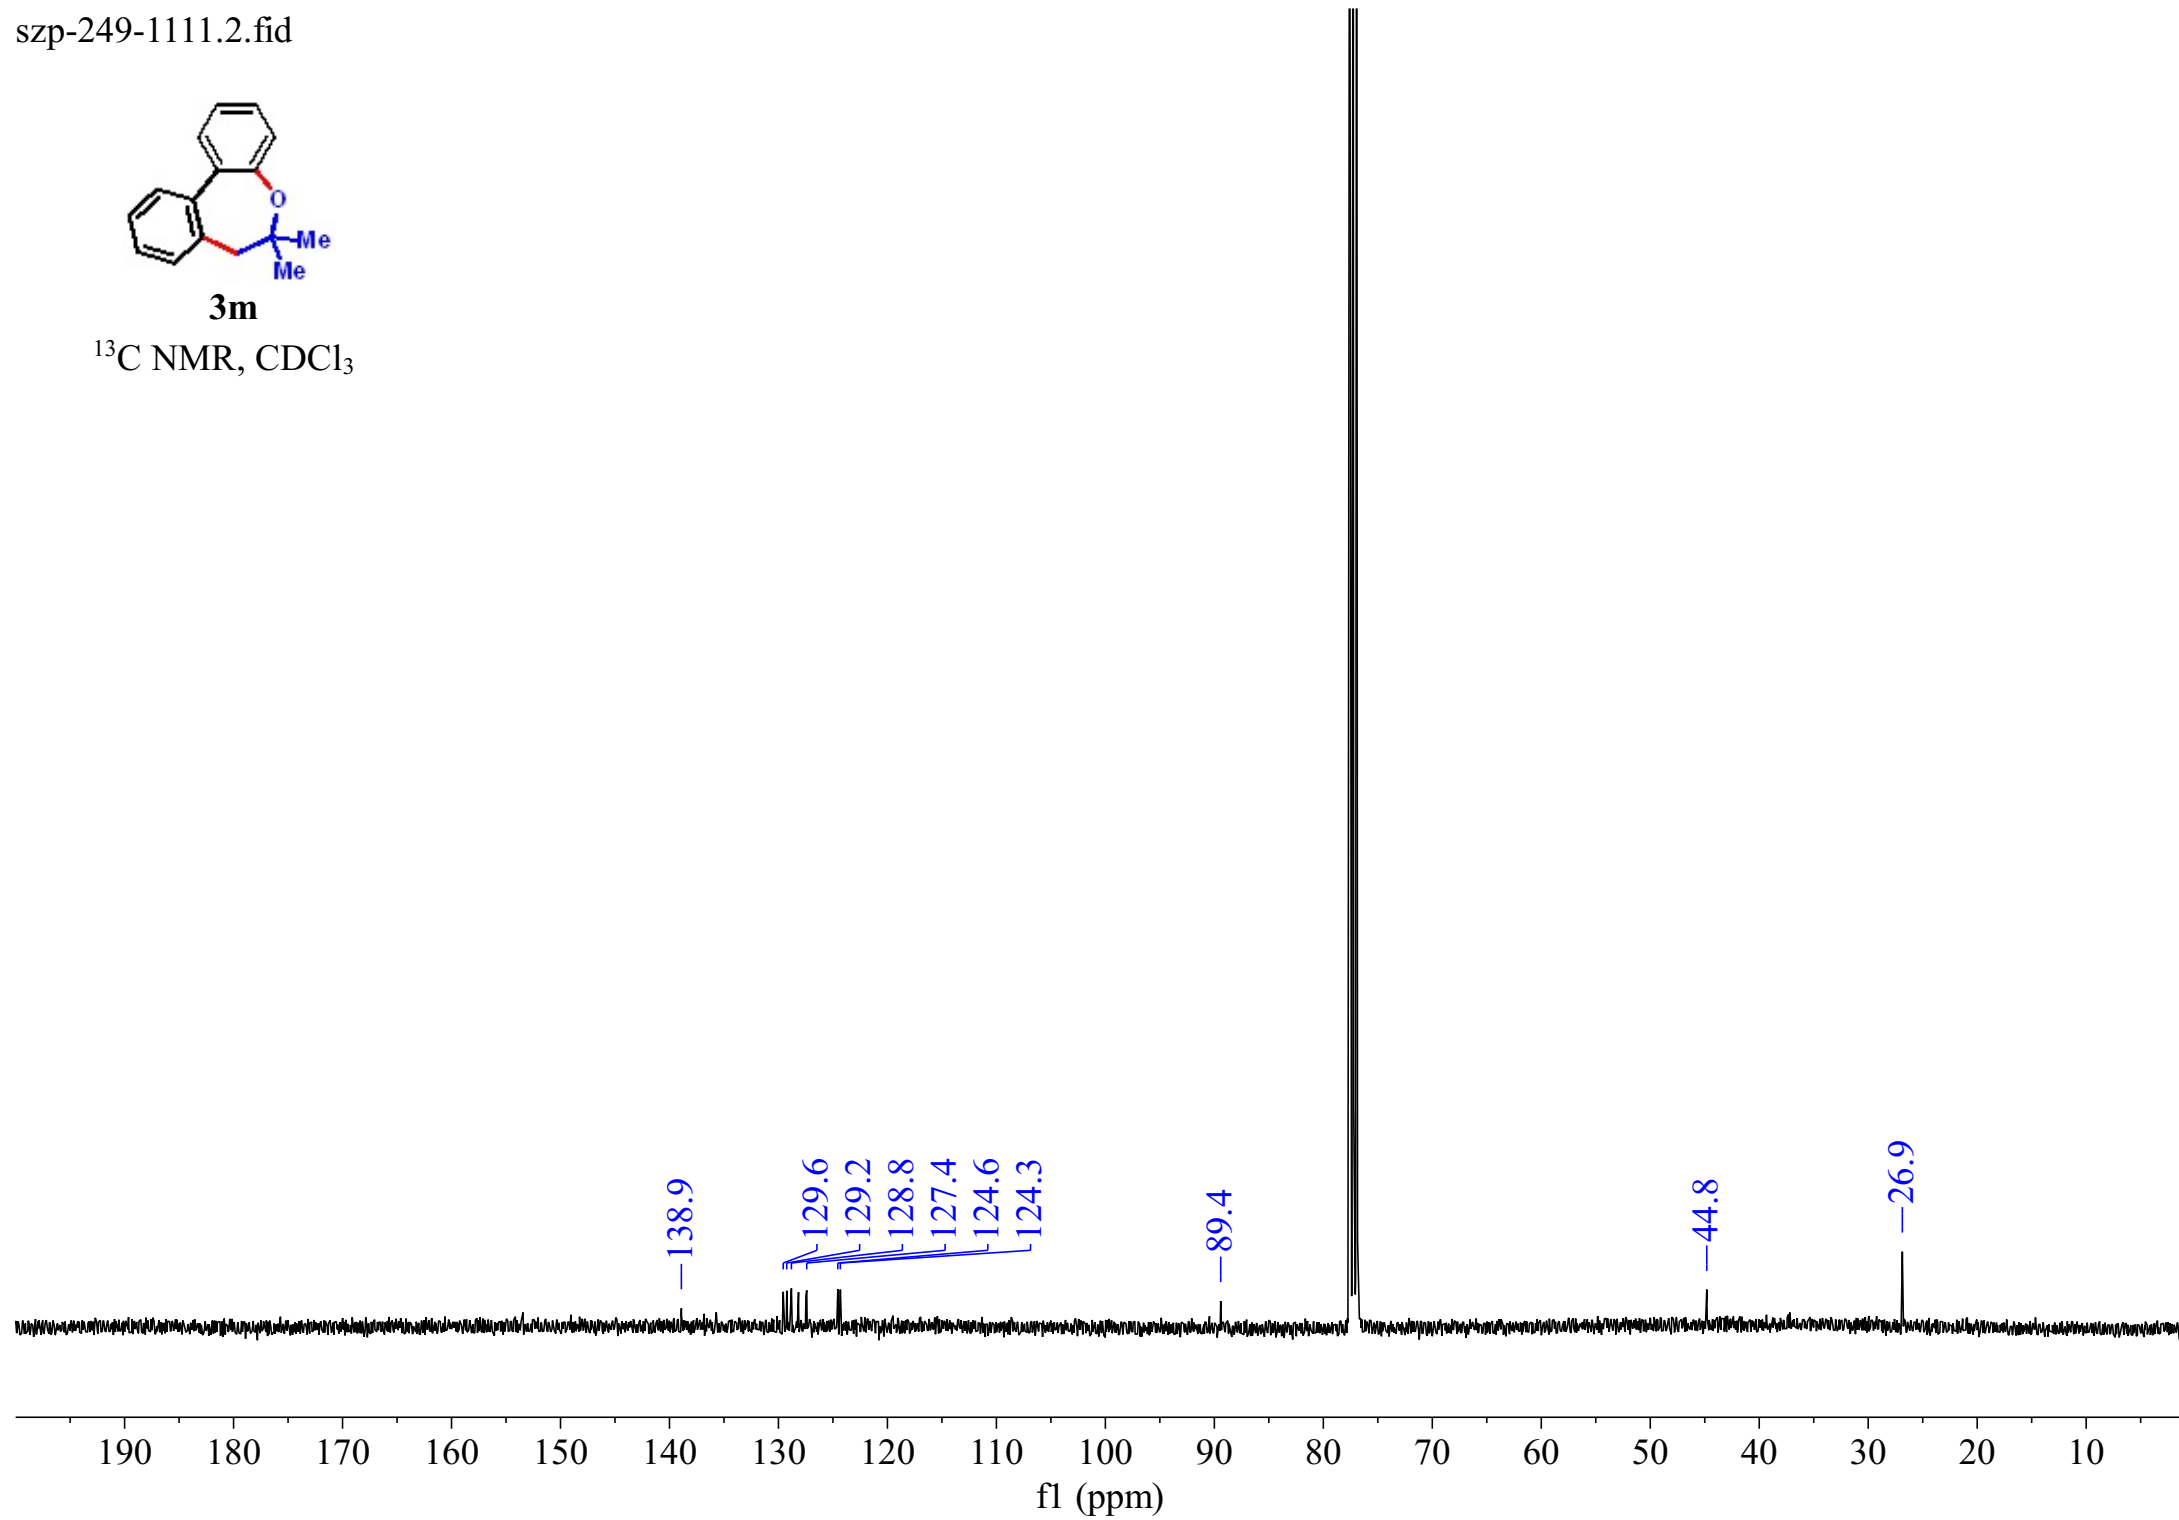



ZN-0470.1.fid

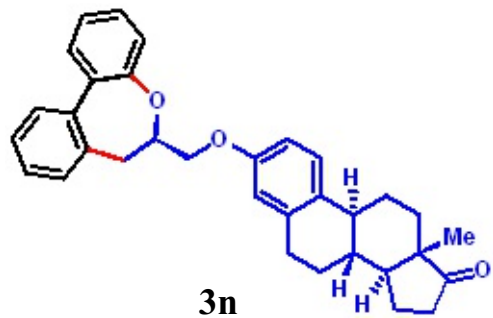

**3n**

<sup>1</sup>H NMR, CDCl<sub>3</sub>

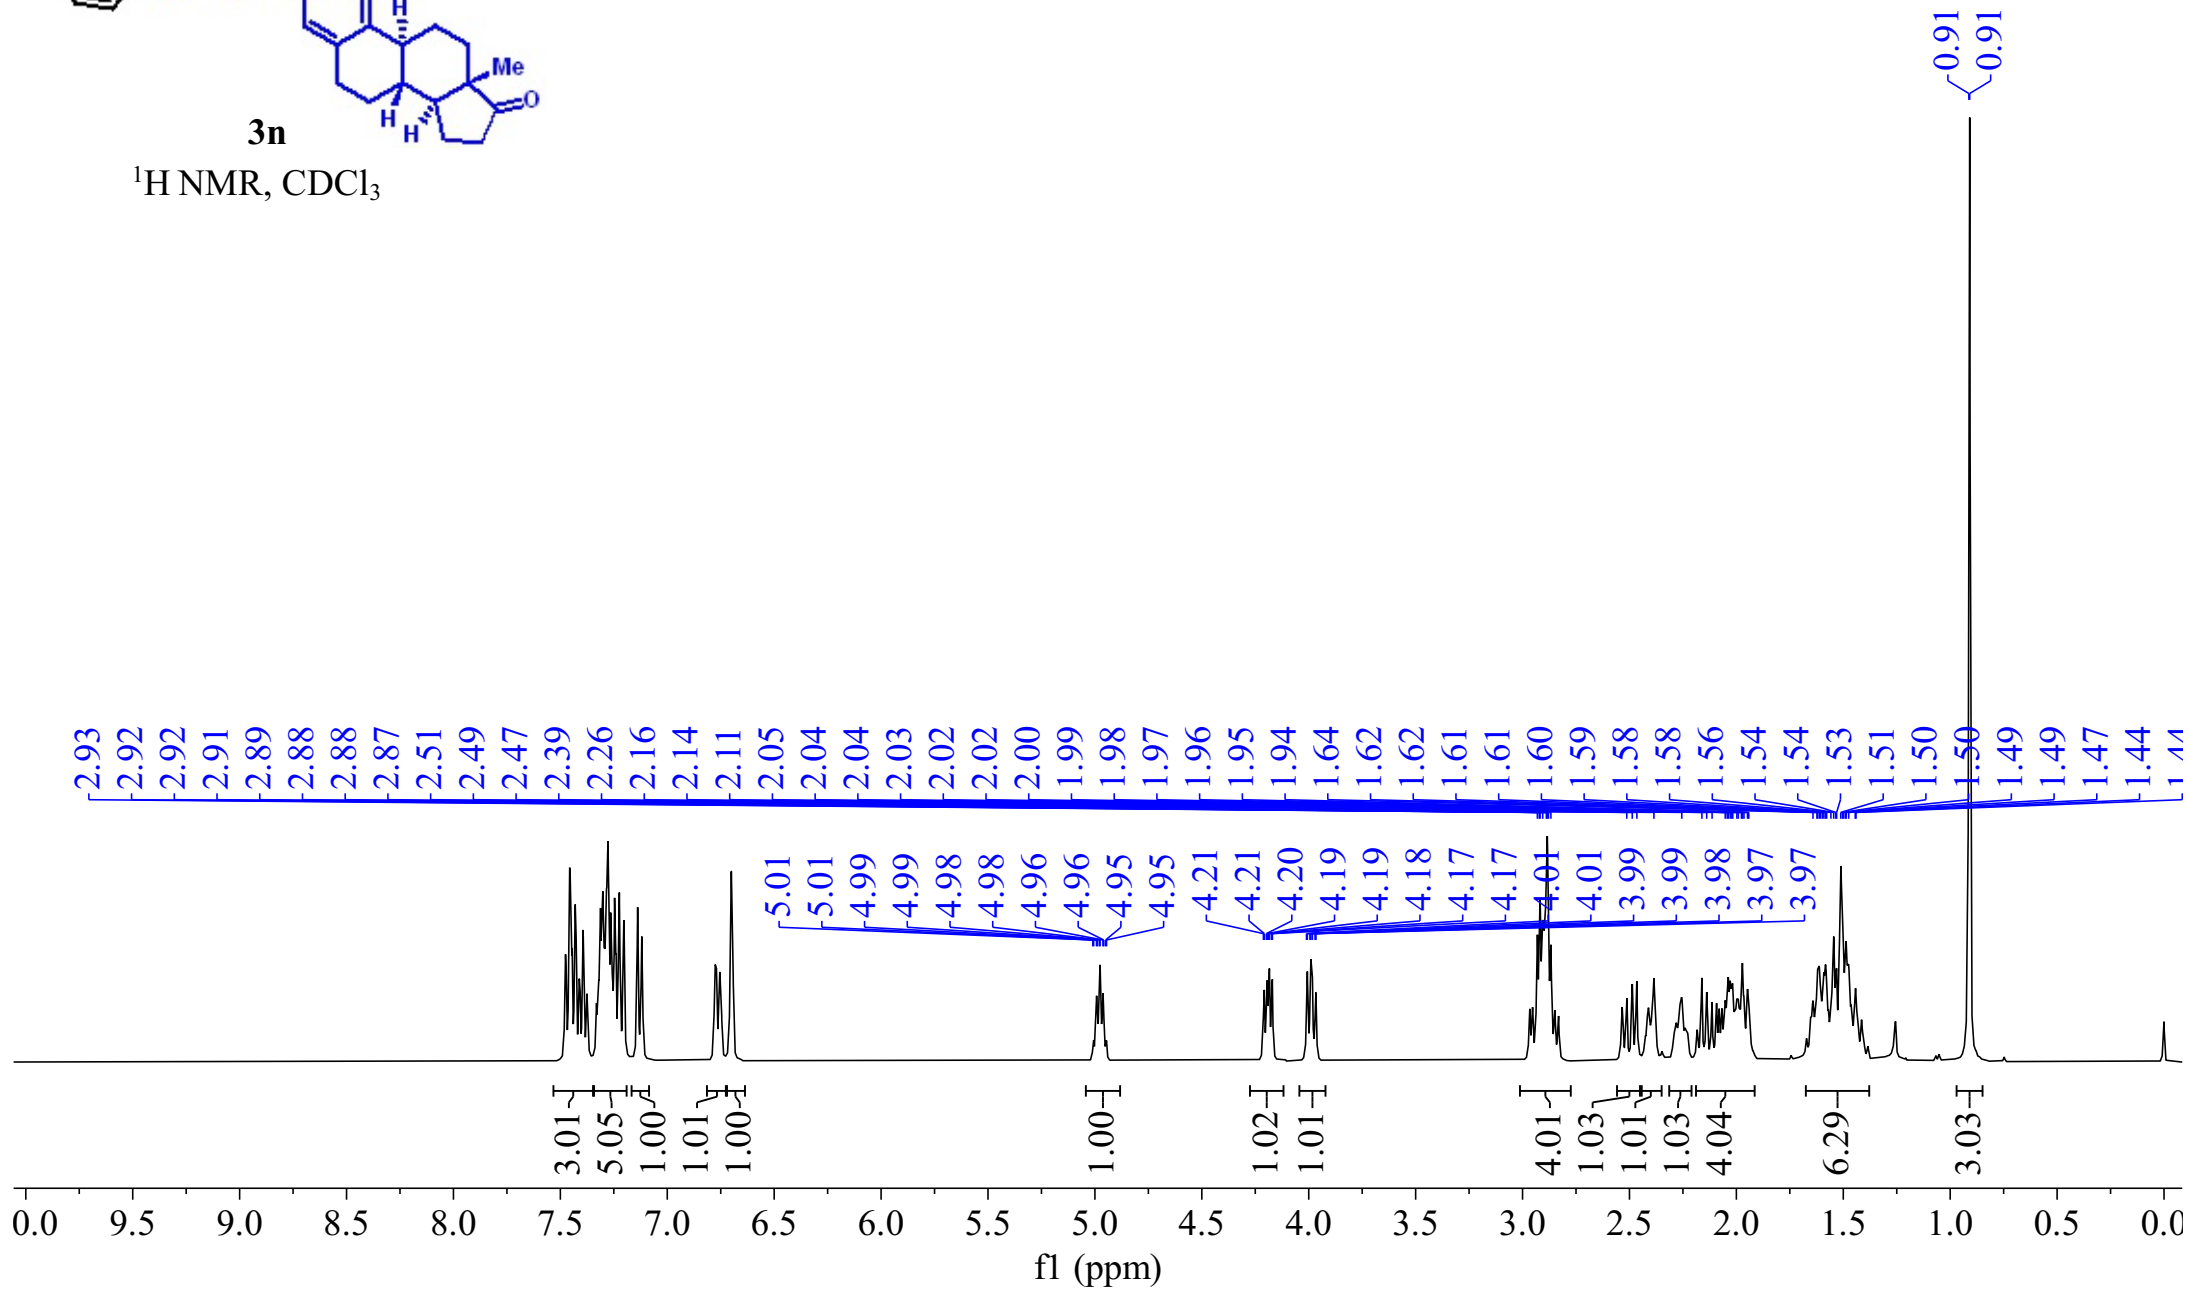

ZN-0470.2.fid

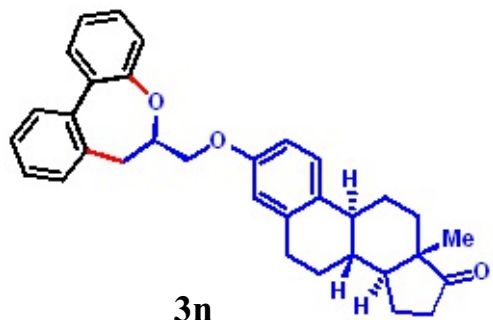

**3n**

$^{13}\text{C}$  NMR,  $\text{CDCl}_3$

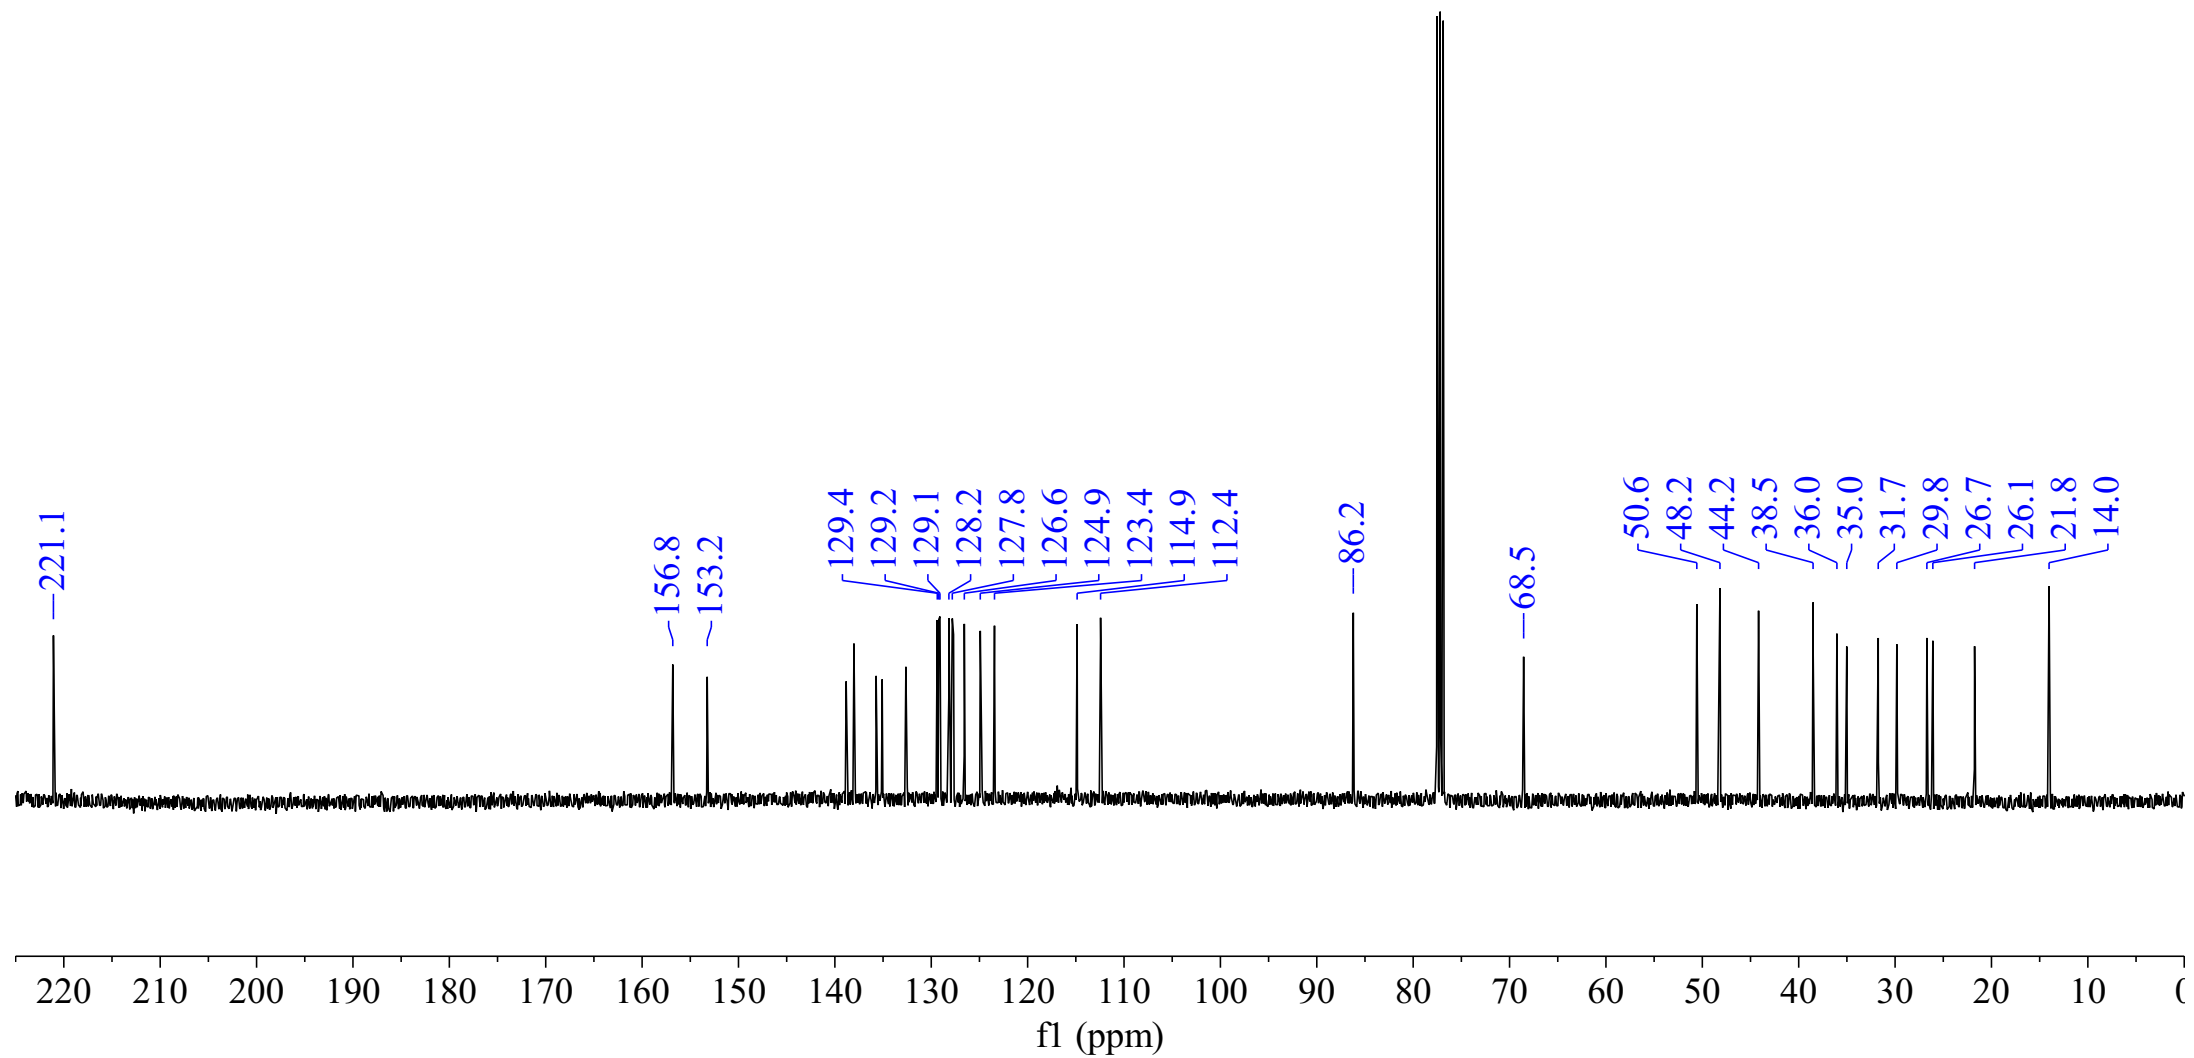

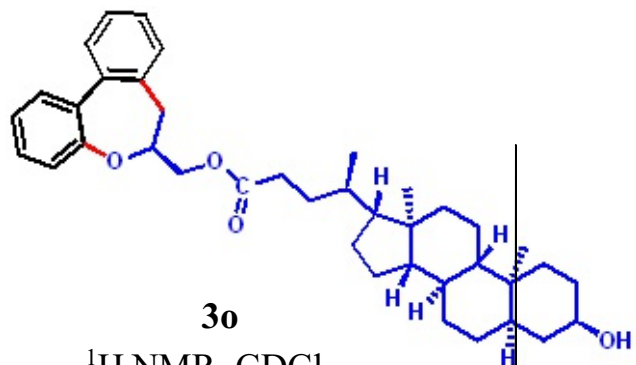**30**<sup>1</sup>H NMR, CDCl<sub>3</sub>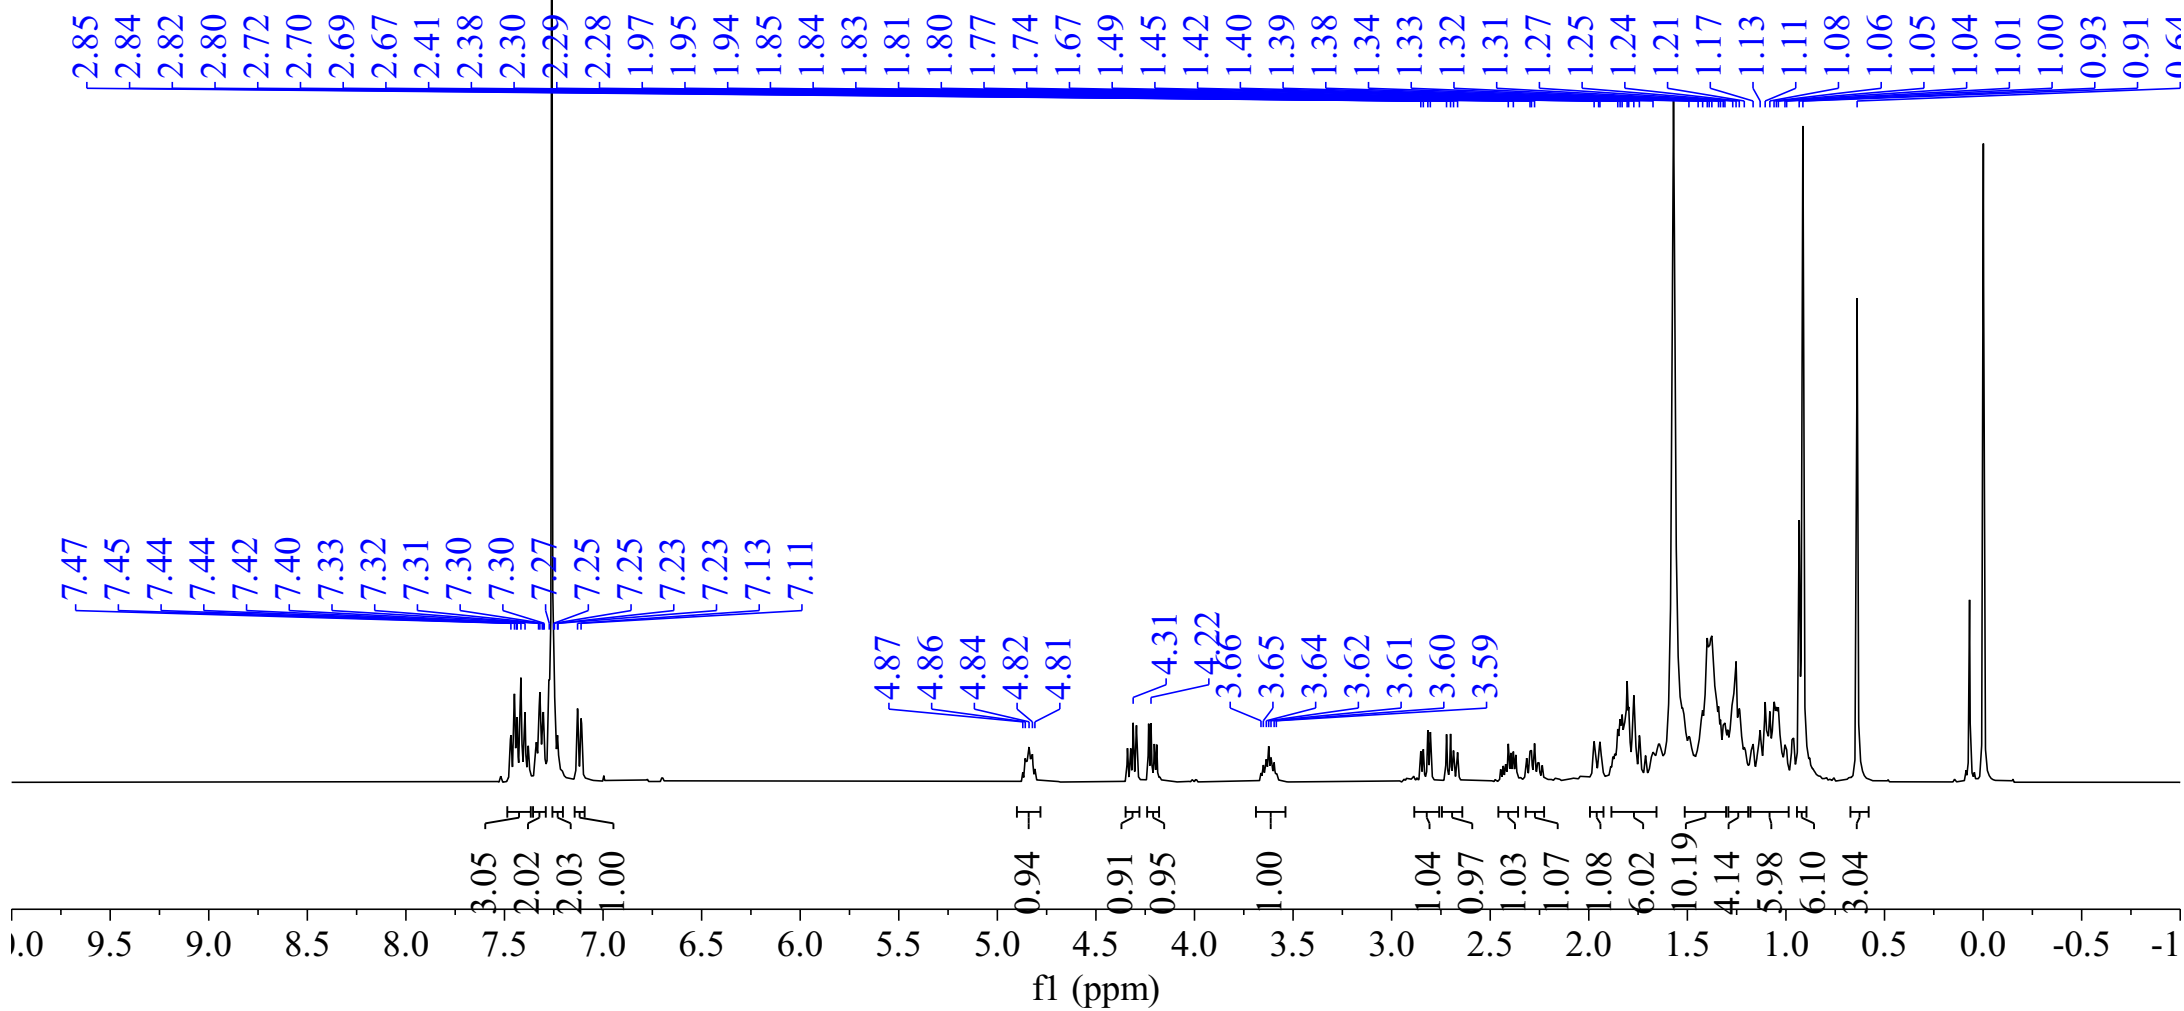

SZP-288-33.2.fid

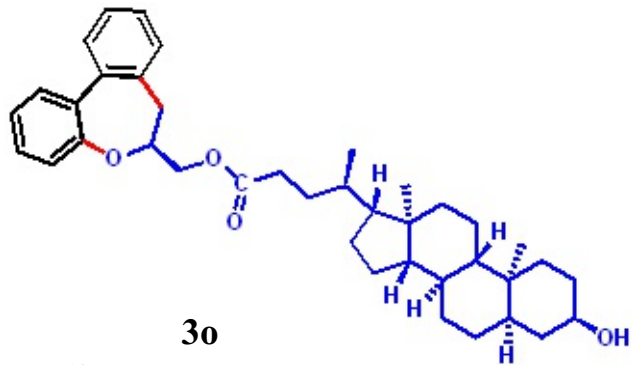

**30**

$^{13}\text{C}$  NMR,  $\text{CDCl}_3$

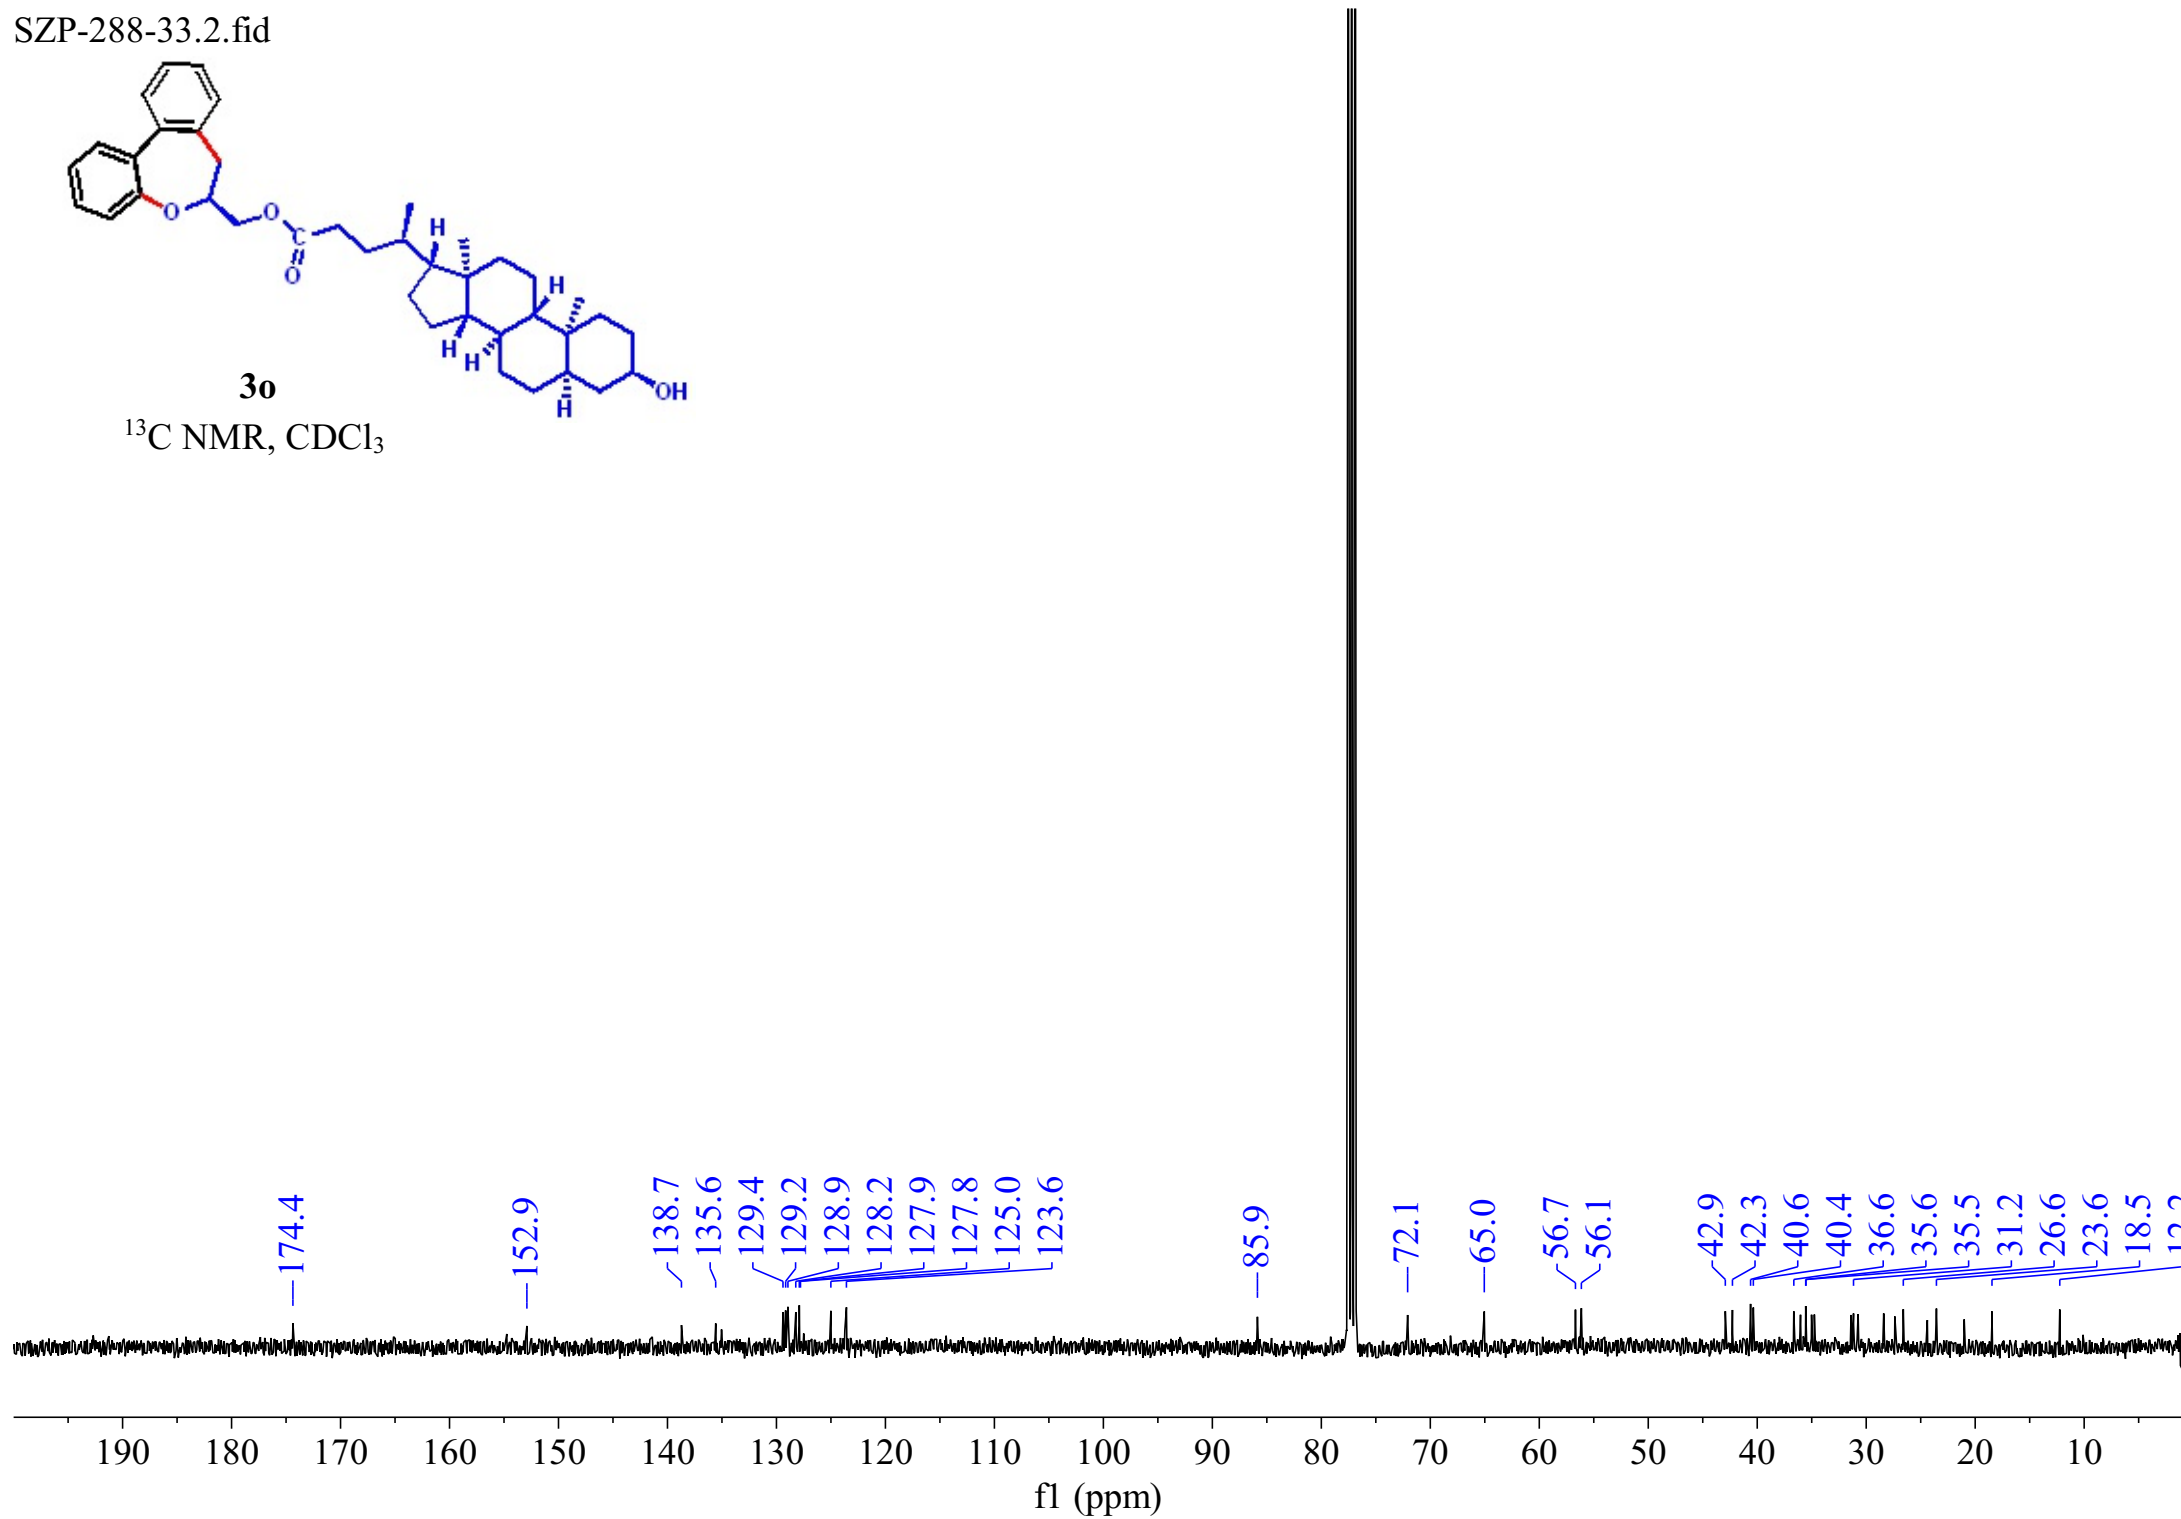

szp-279-3

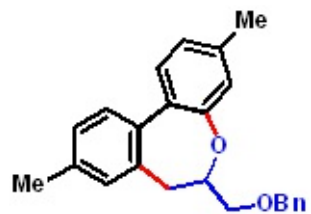

**3p**

<sup>1</sup>H NMR, CDCl<sub>3</sub>

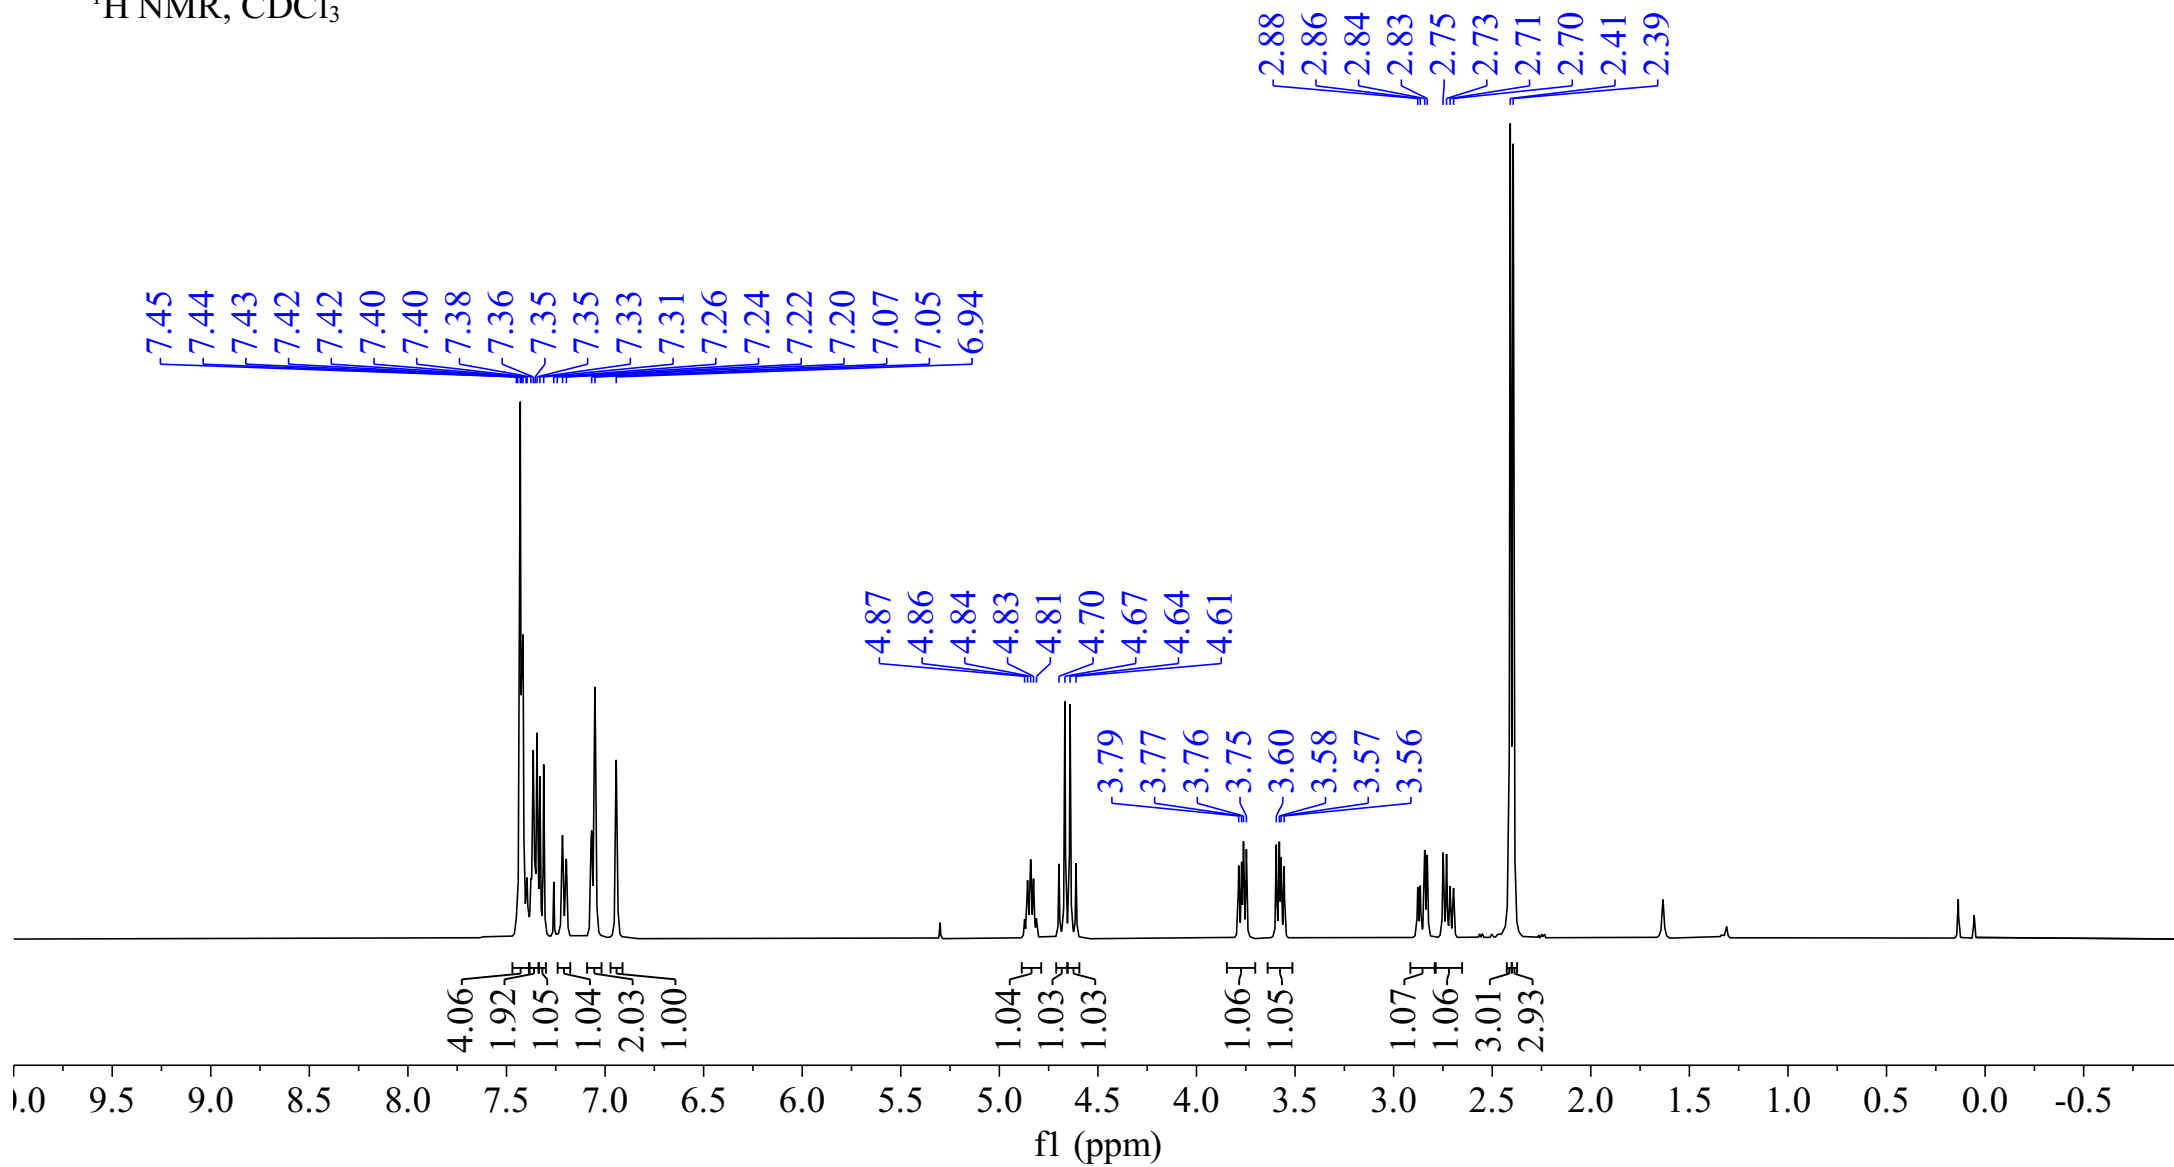

szp-279-3.2.fid

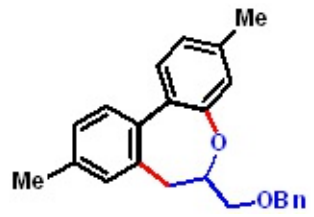

**3p**

<sup>13</sup>C NMR, CDCl<sub>3</sub>

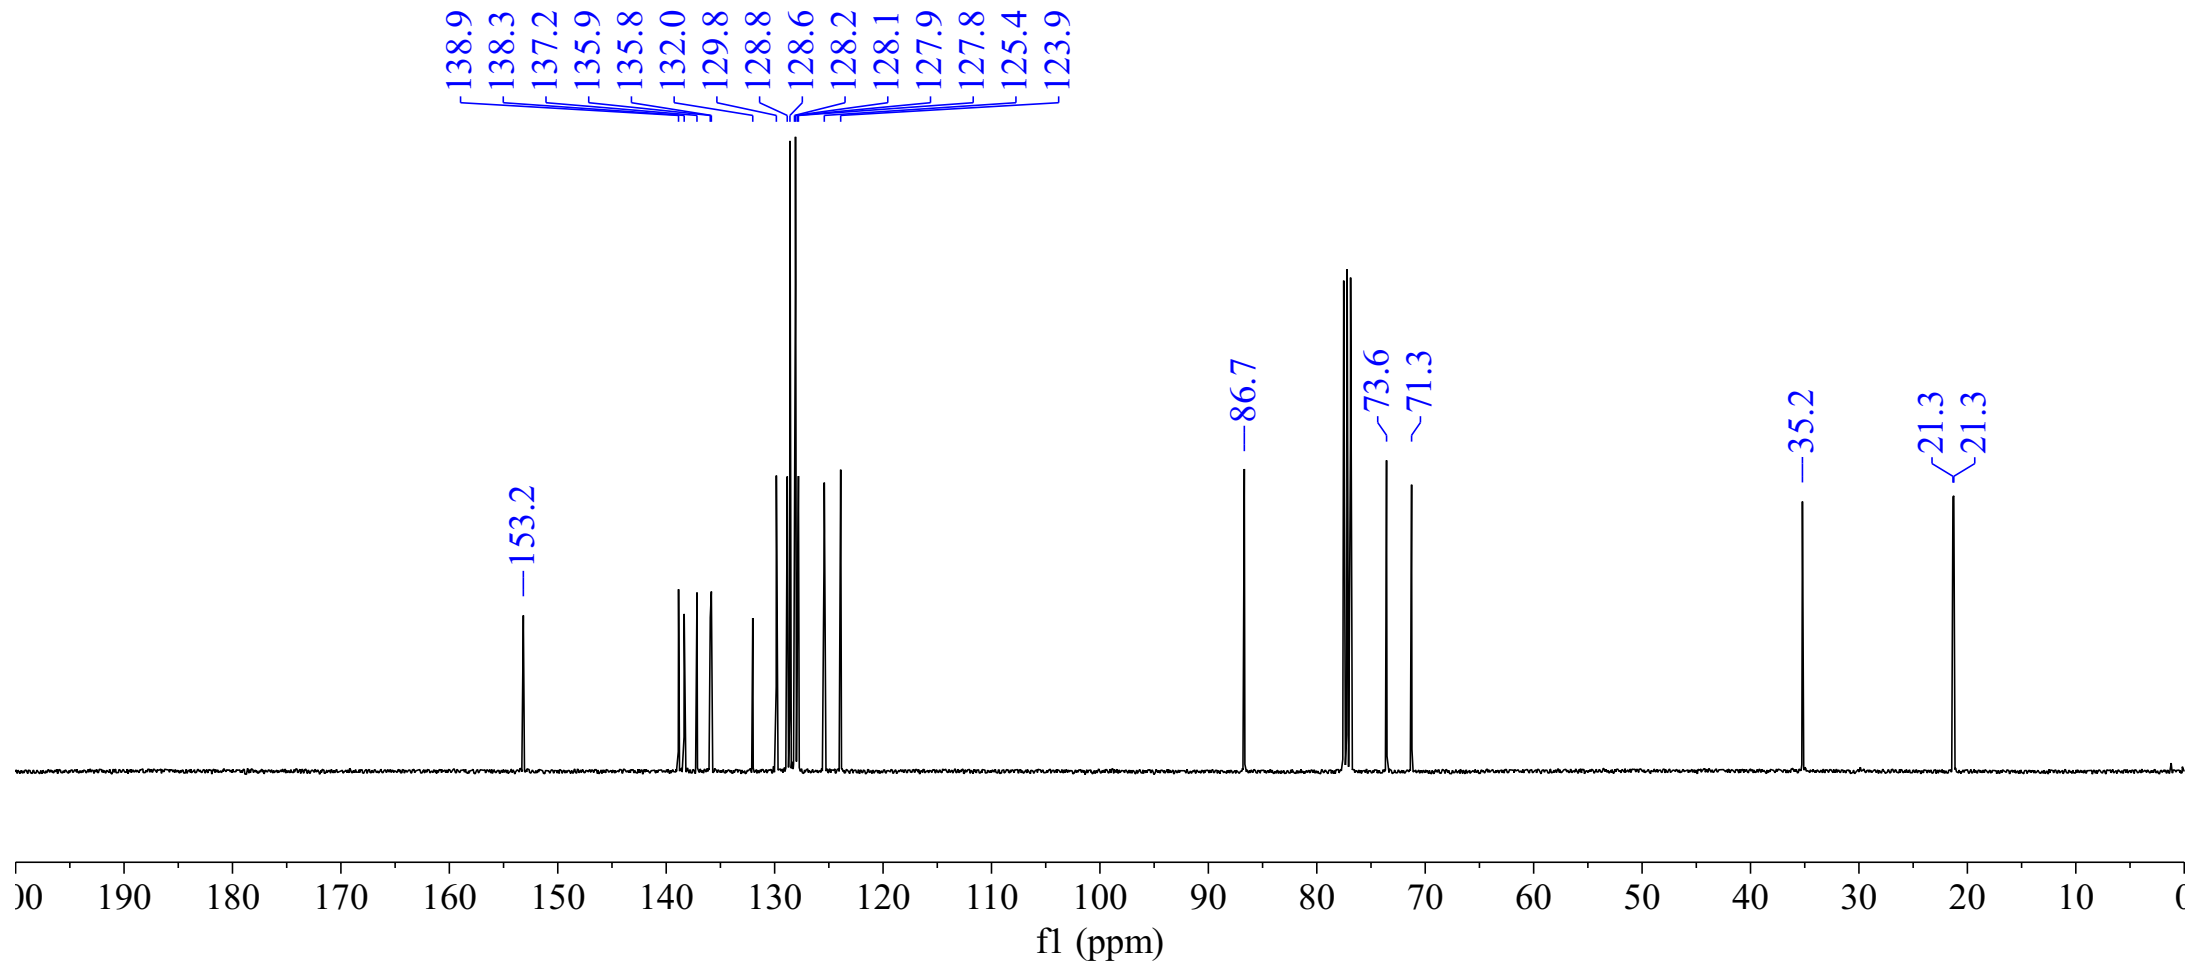

szp-273-3

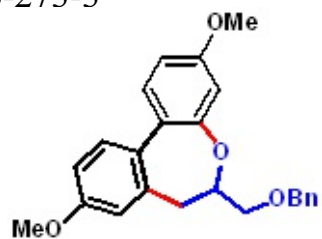

**3q**

$^1\text{H NMR}$ ,  $\text{CDCl}_3$

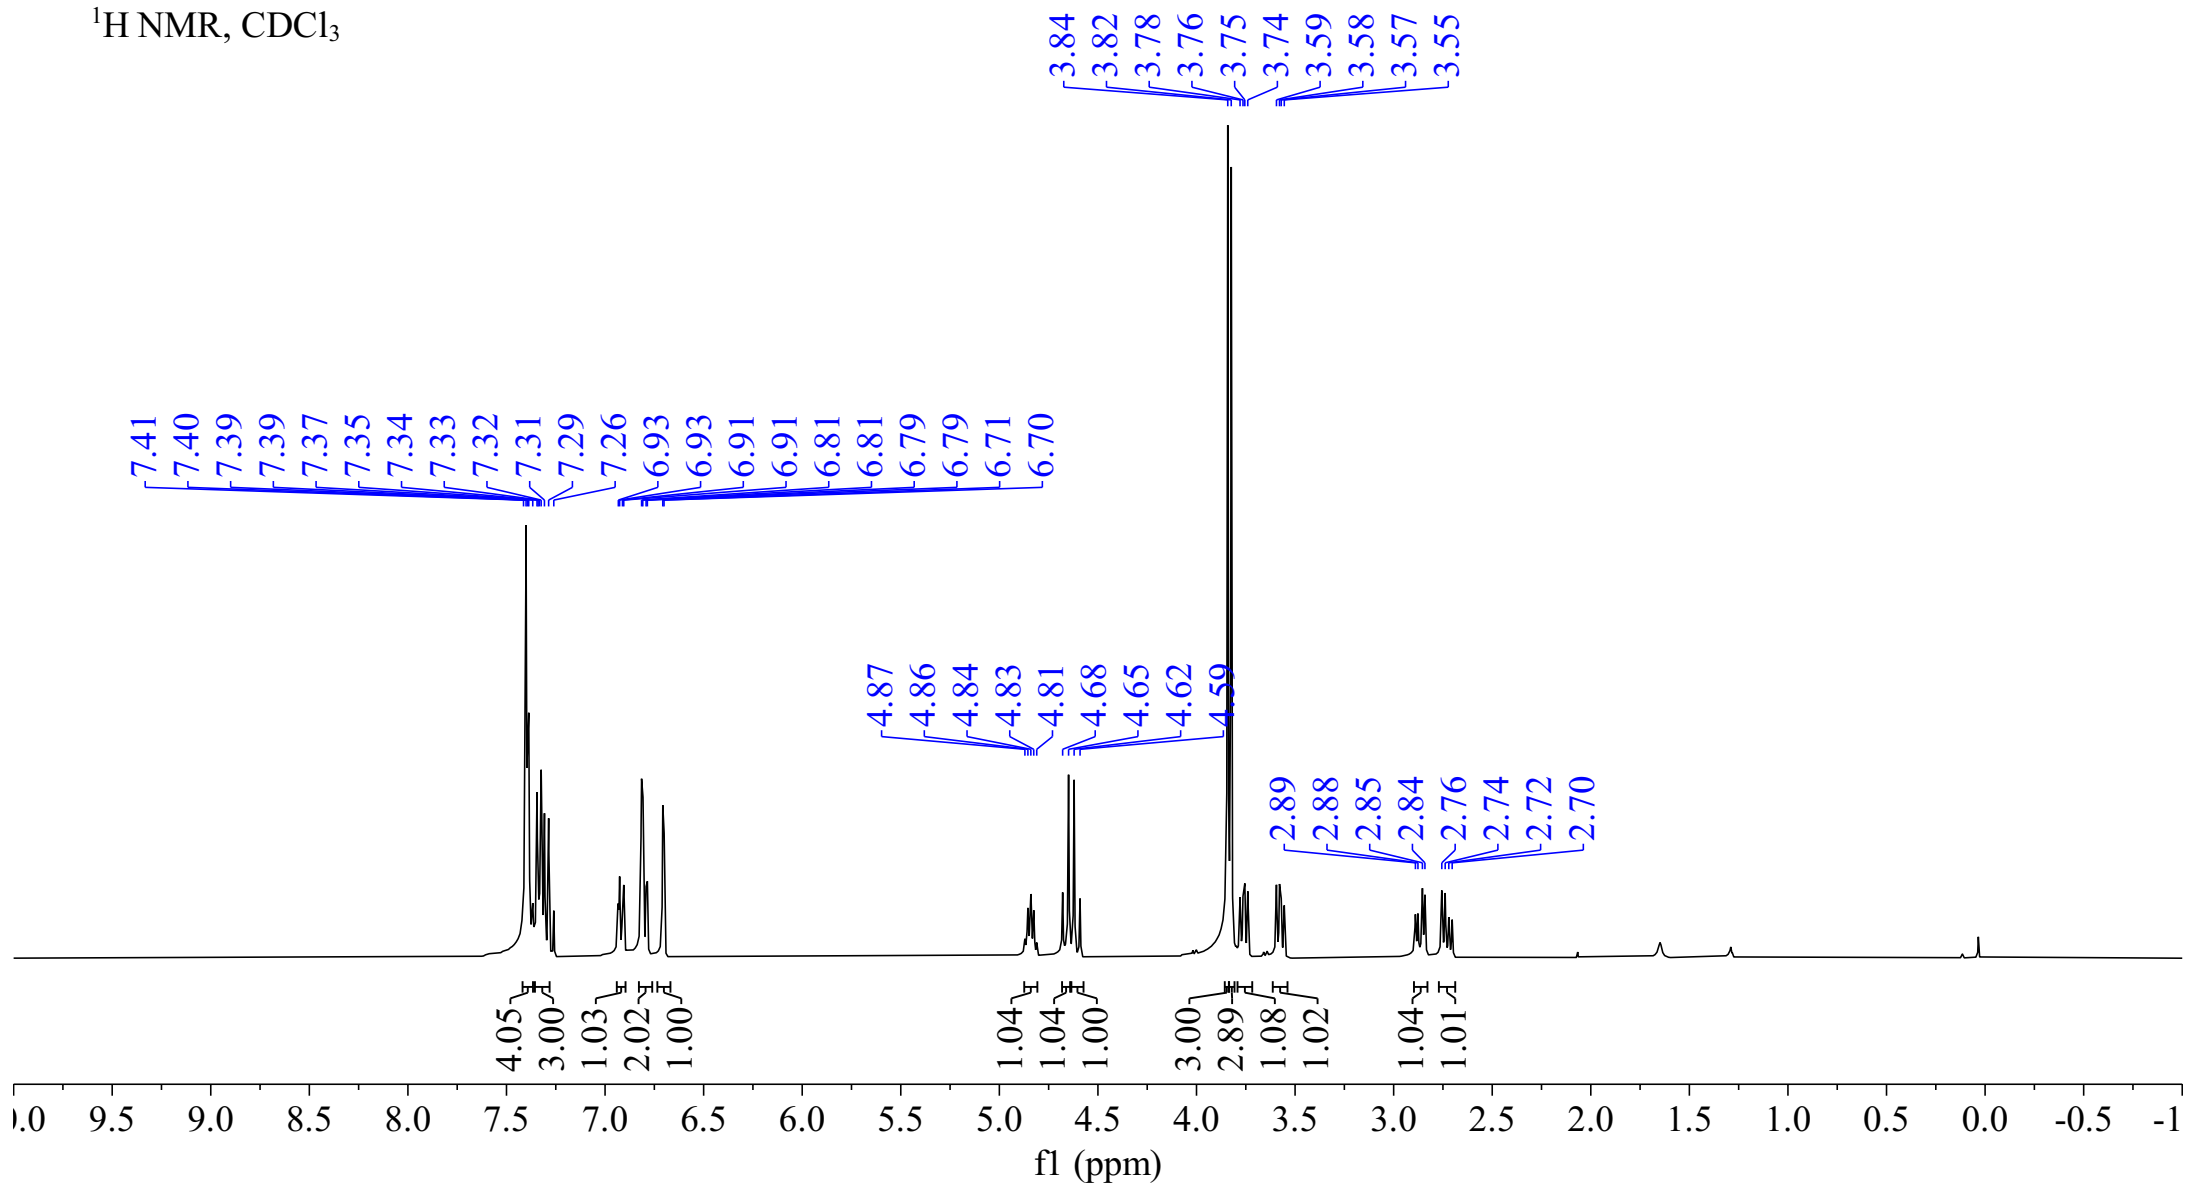

szp-273-3.2.fid

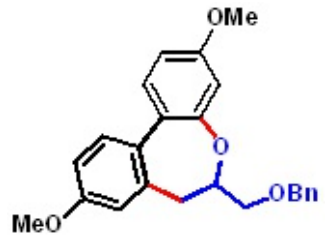

**3q**

<sup>13</sup>C NMR, CDCl<sub>3</sub>

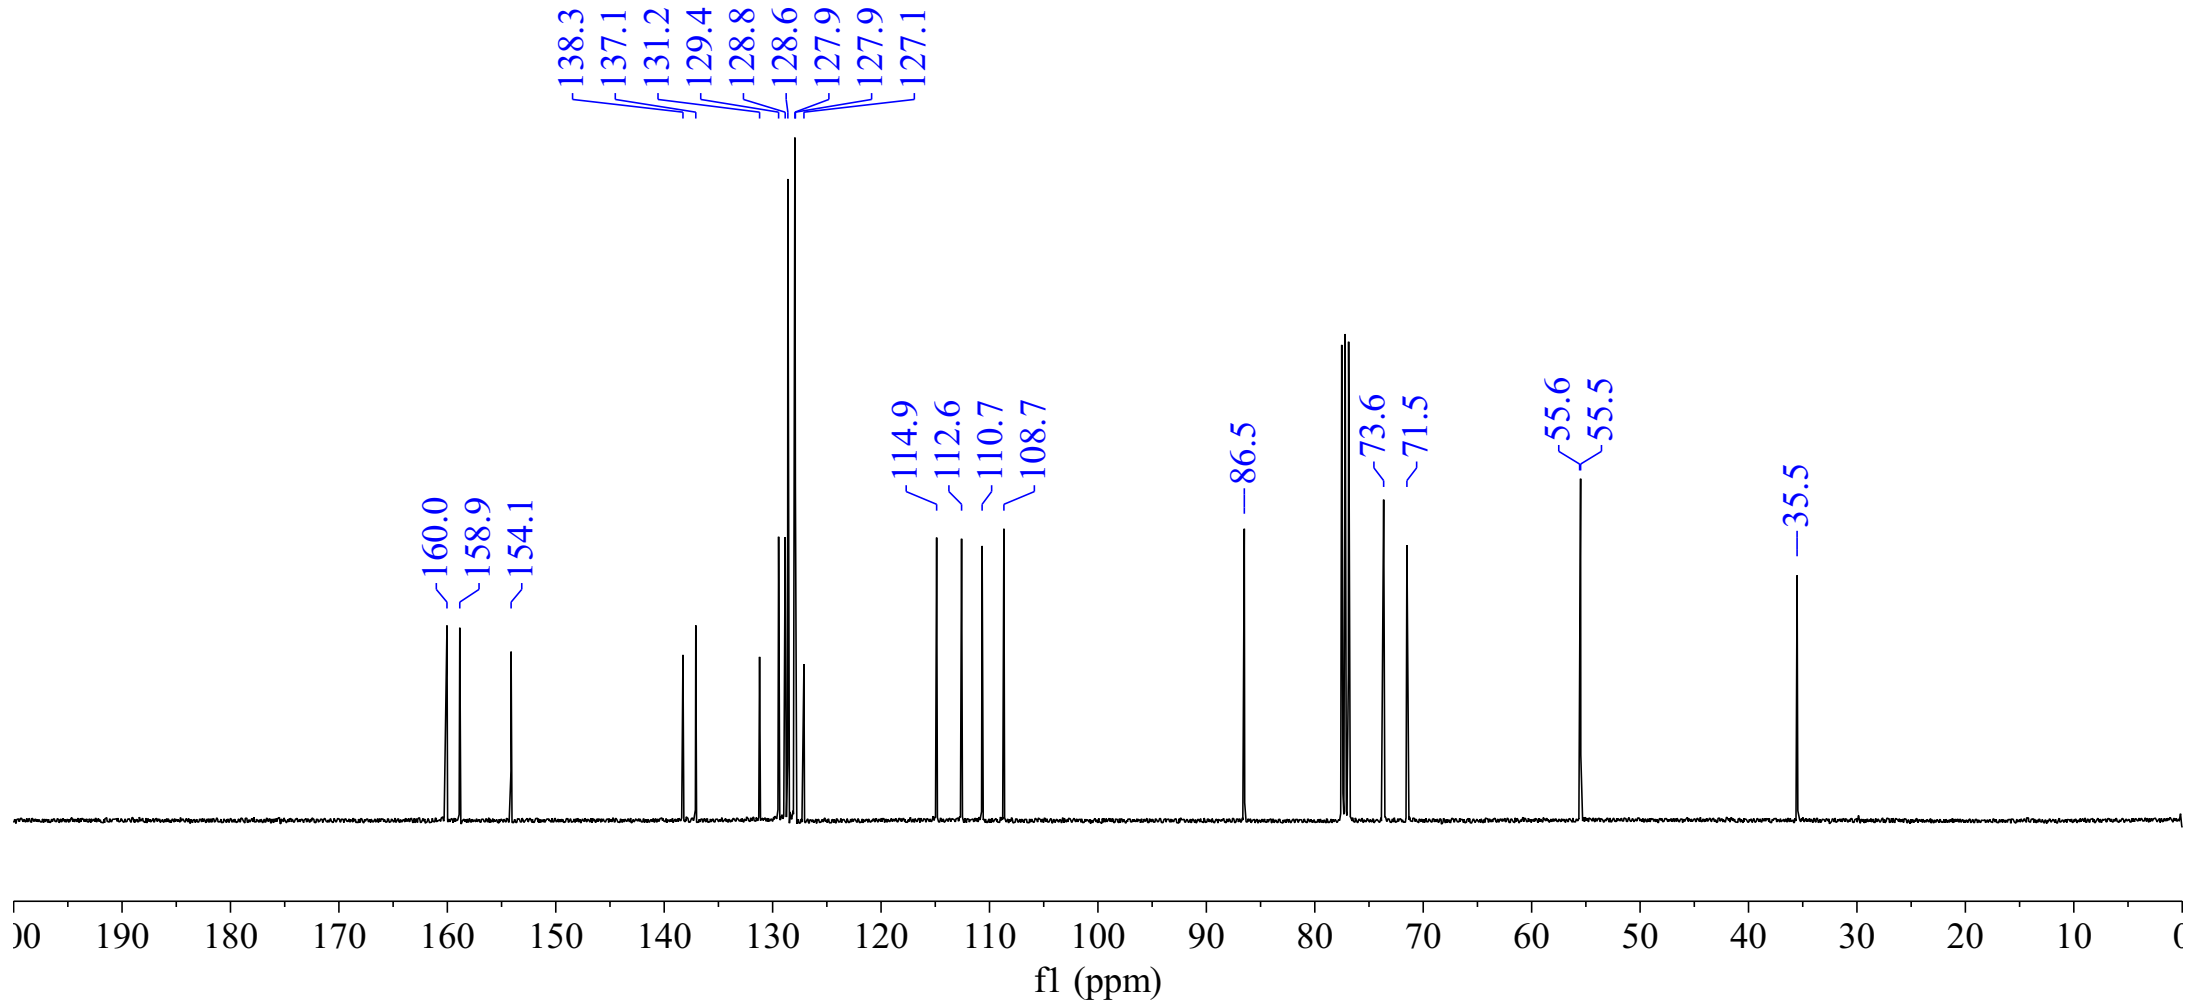



szp-266-11

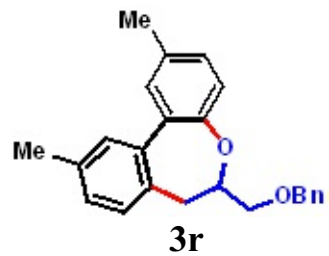

$^1\text{H NMR}$ ,  $\text{CDCl}_3$

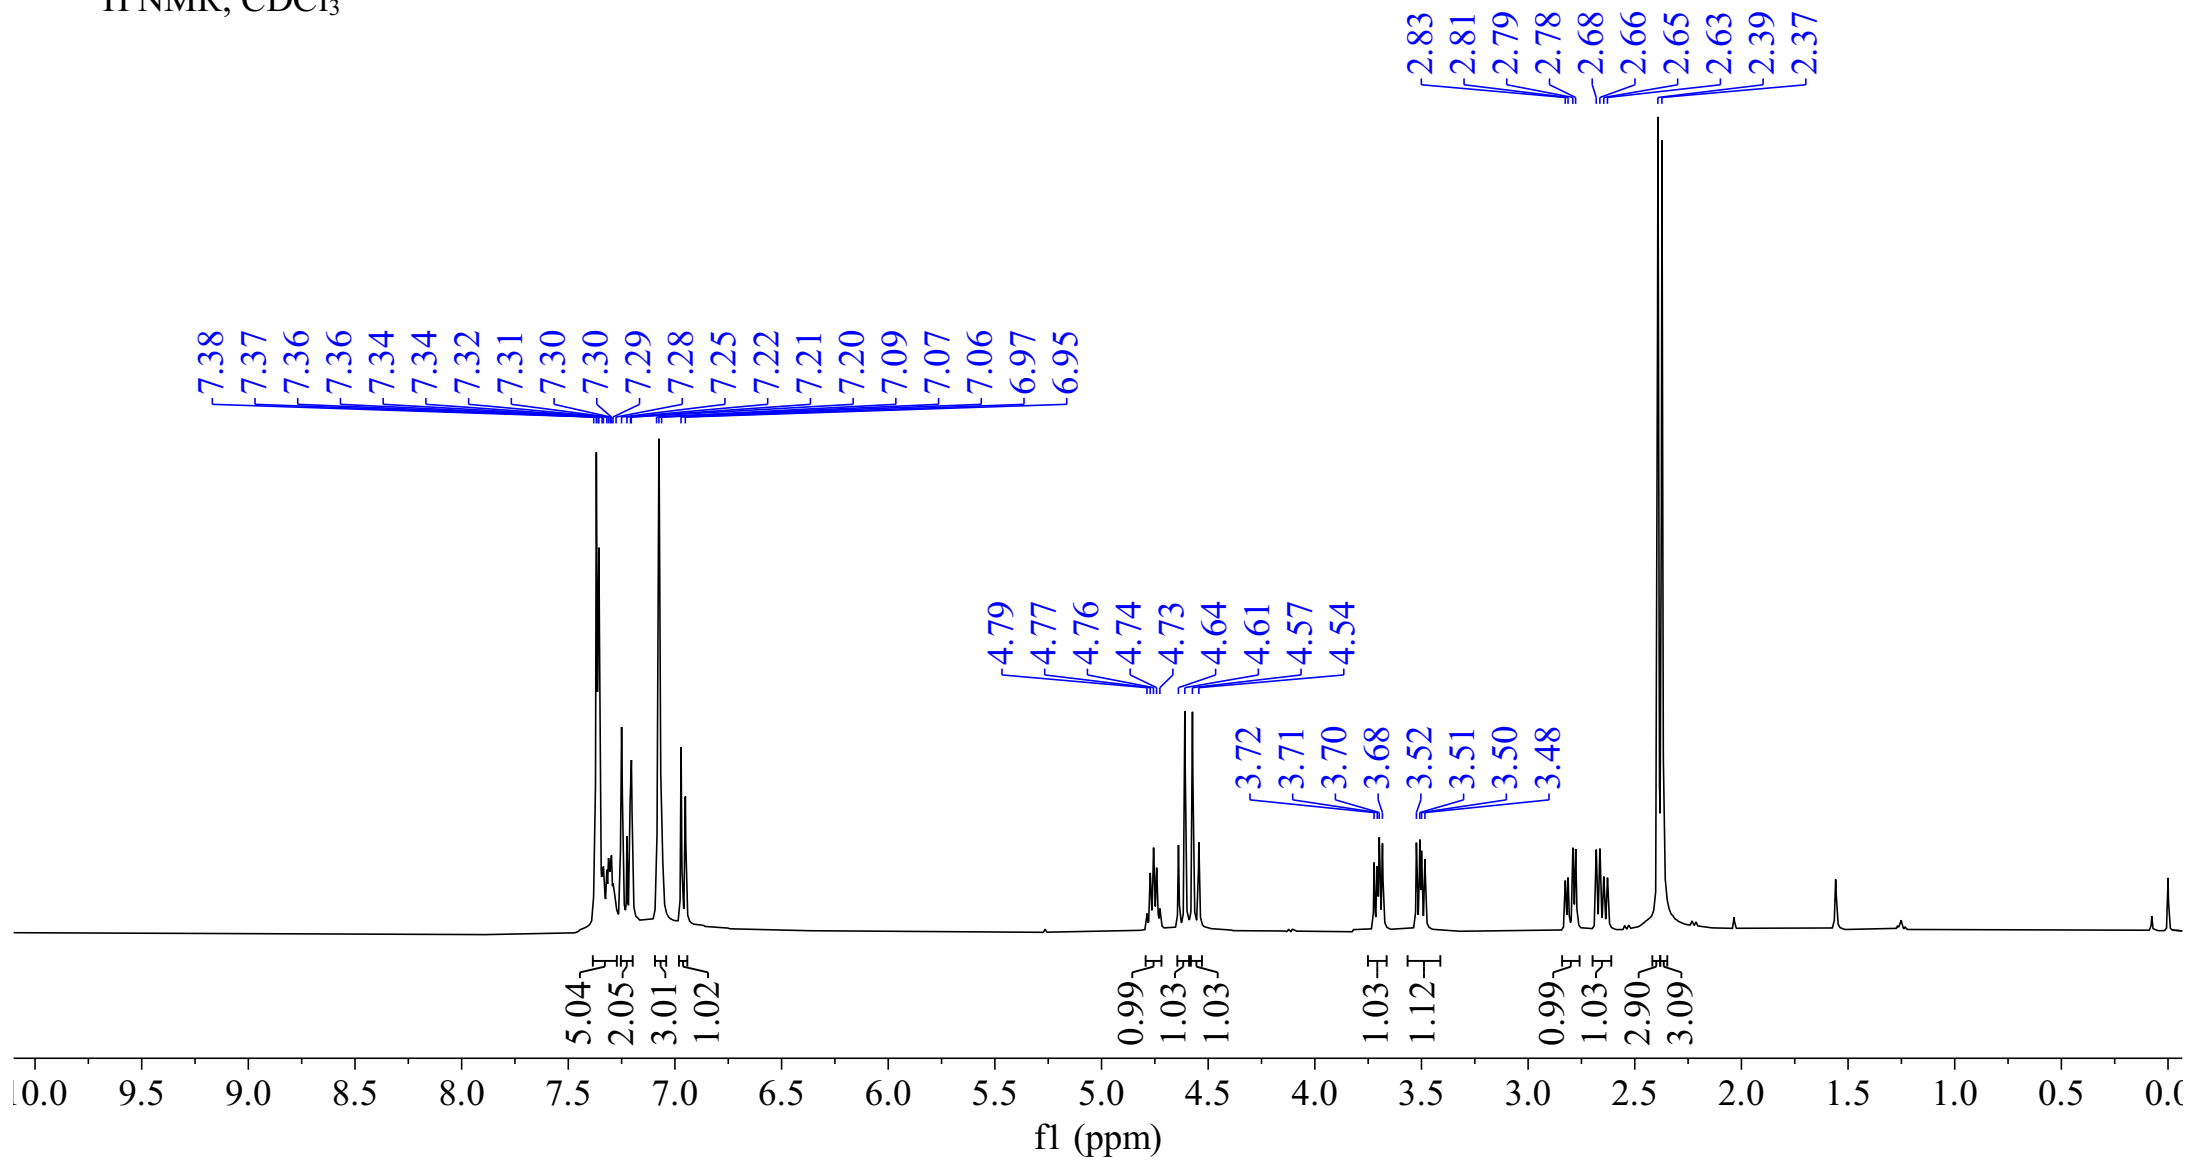

szp-266-111.1.fid

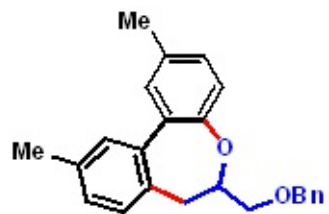

**3r**

<sup>13</sup>C NMR, CDCl<sub>3</sub>

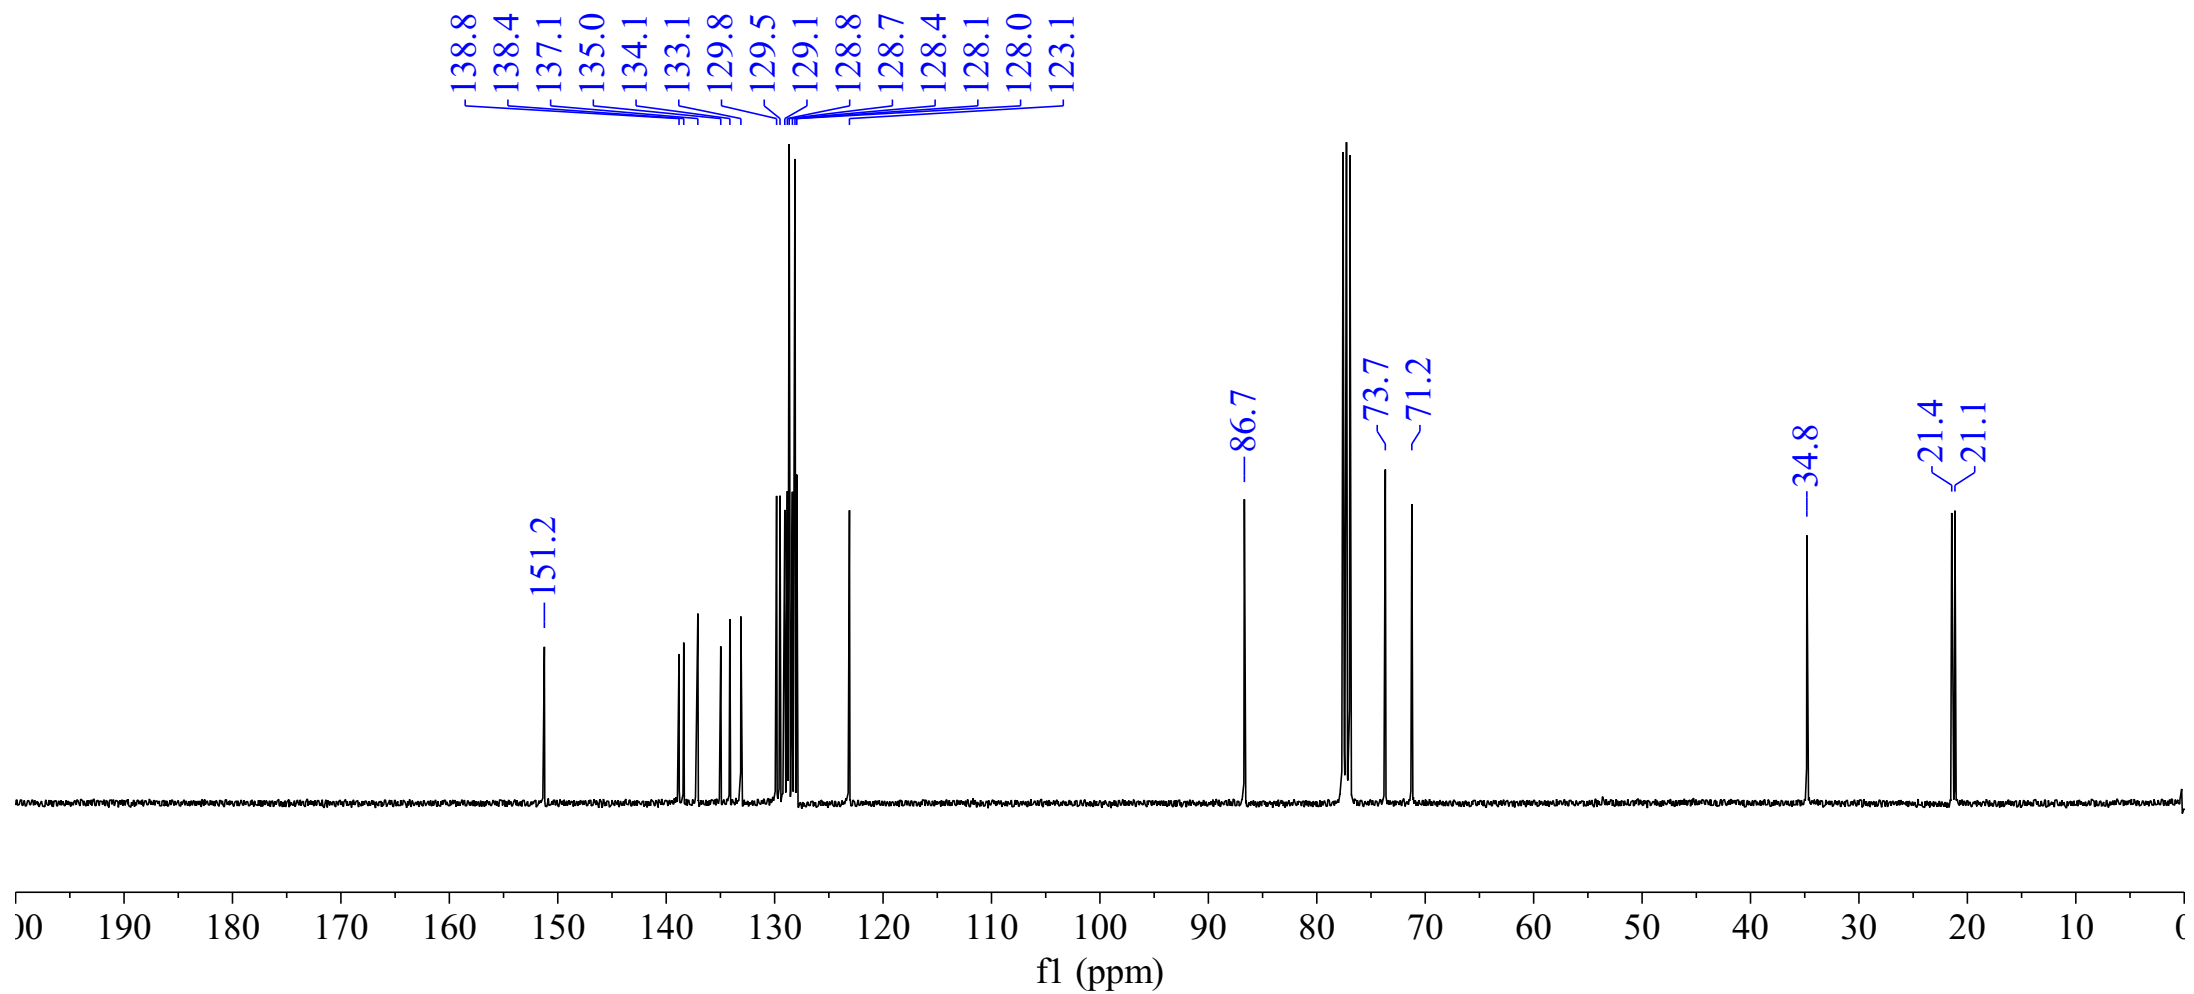

ZN-2022-0905.1.fid

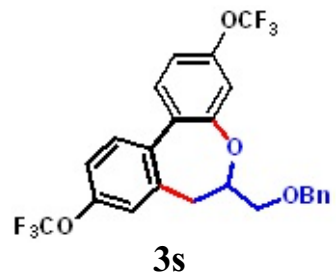

$^1\text{H NMR}$ ,  $\text{CDCl}_3$

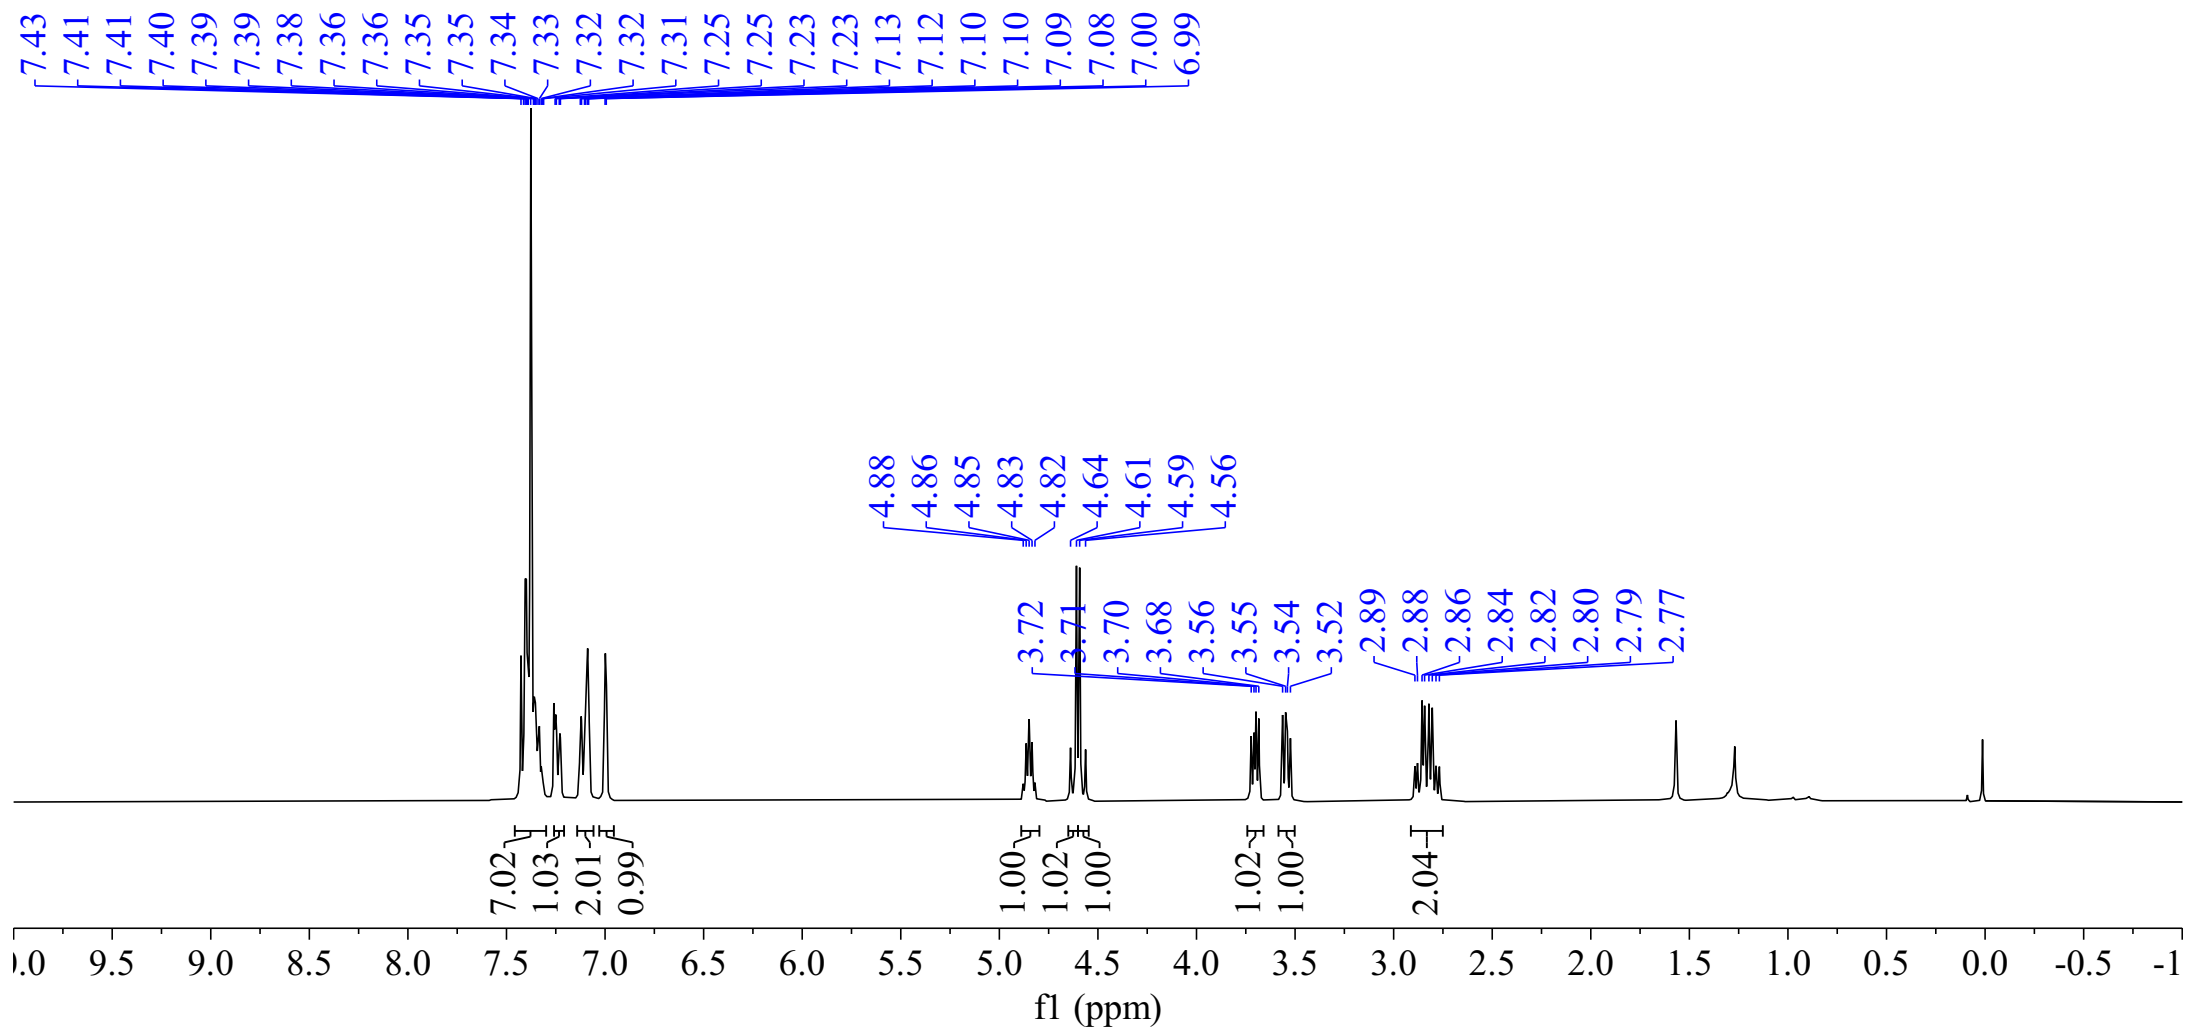

SZP-OCF3.2.fid

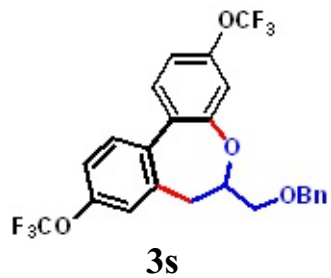

<sup>13</sup>C NMR, CDCl<sub>3</sub>

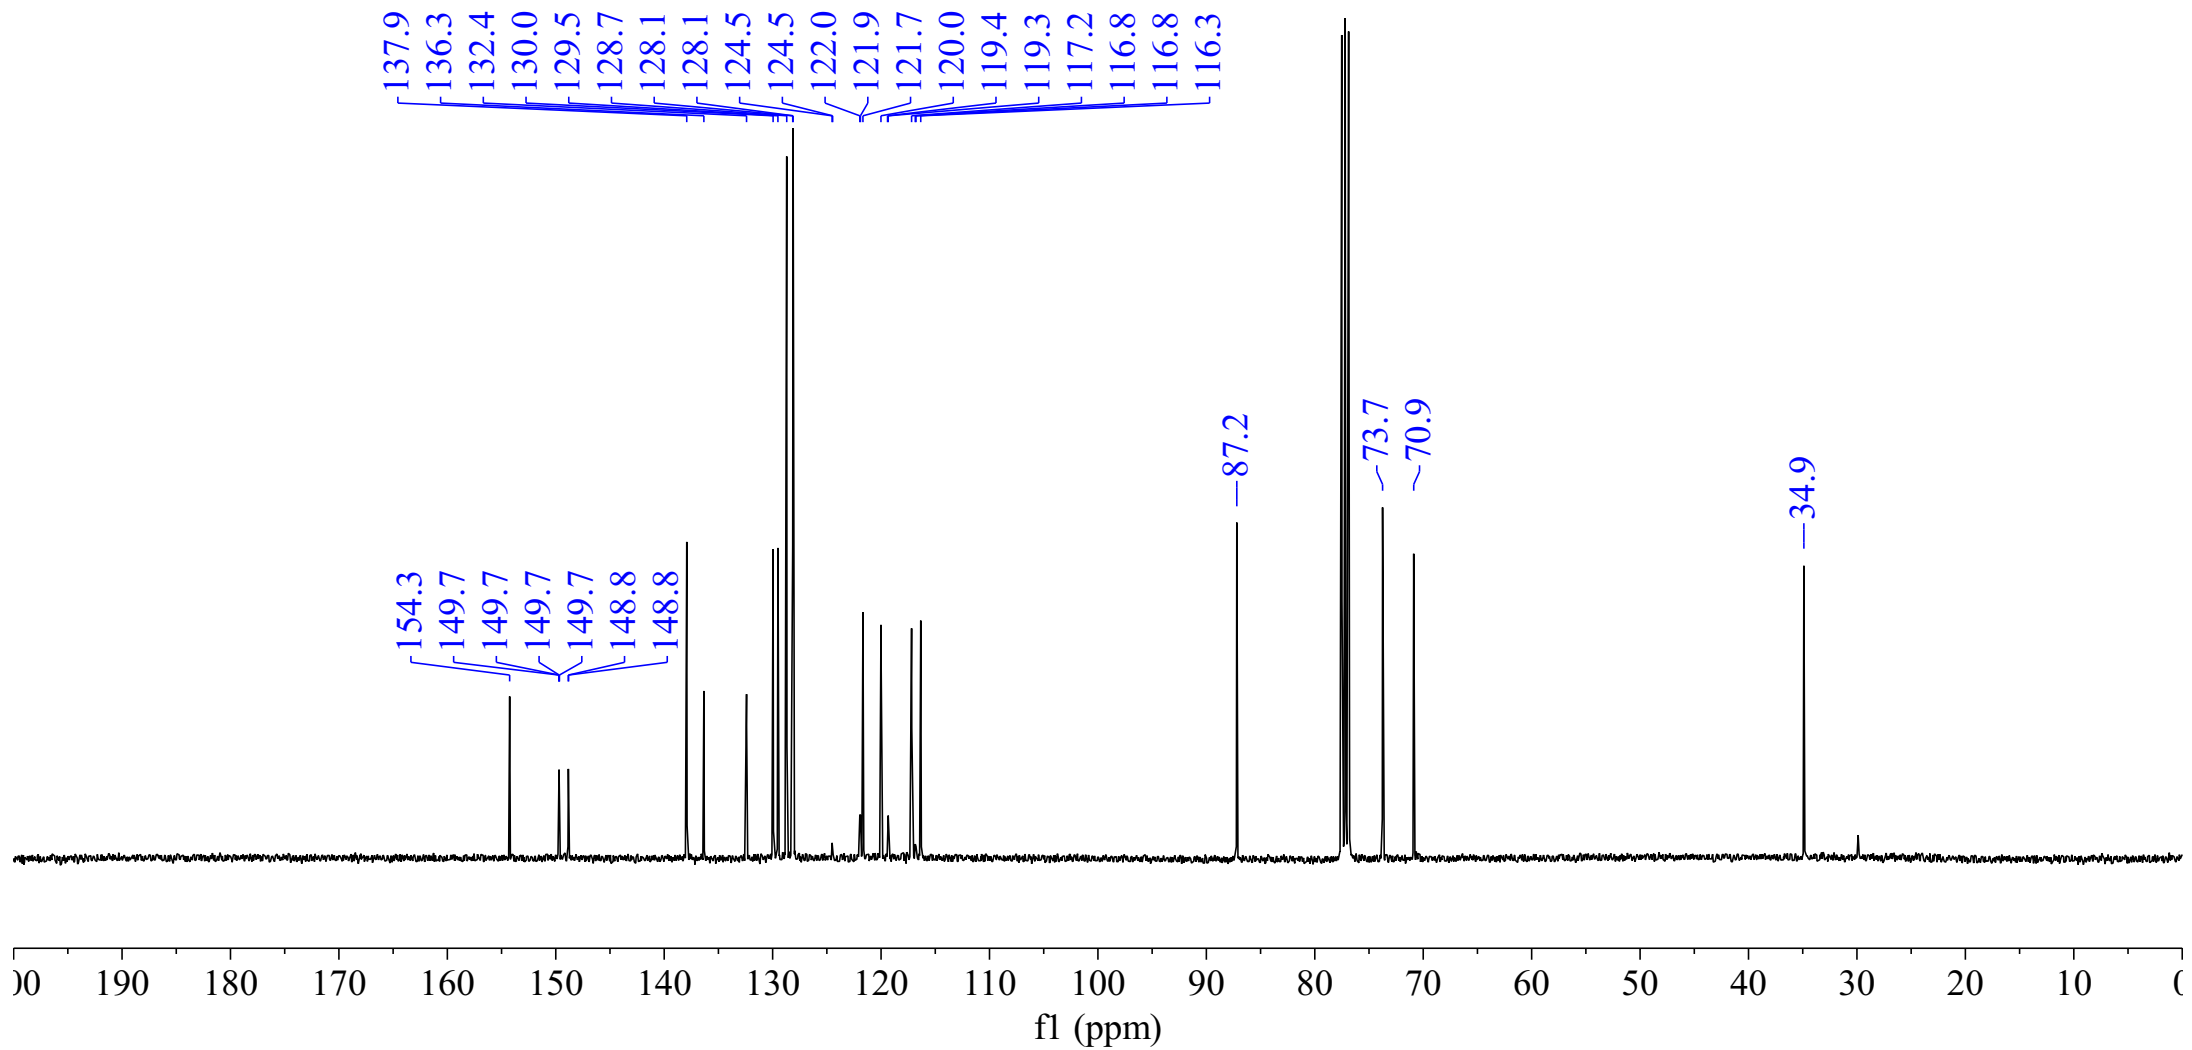

SZP-OCF3.3.fid

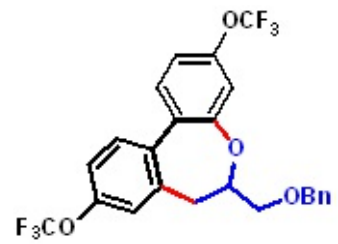

**3s**

<sup>19</sup>F NMR, CDCl<sub>3</sub>

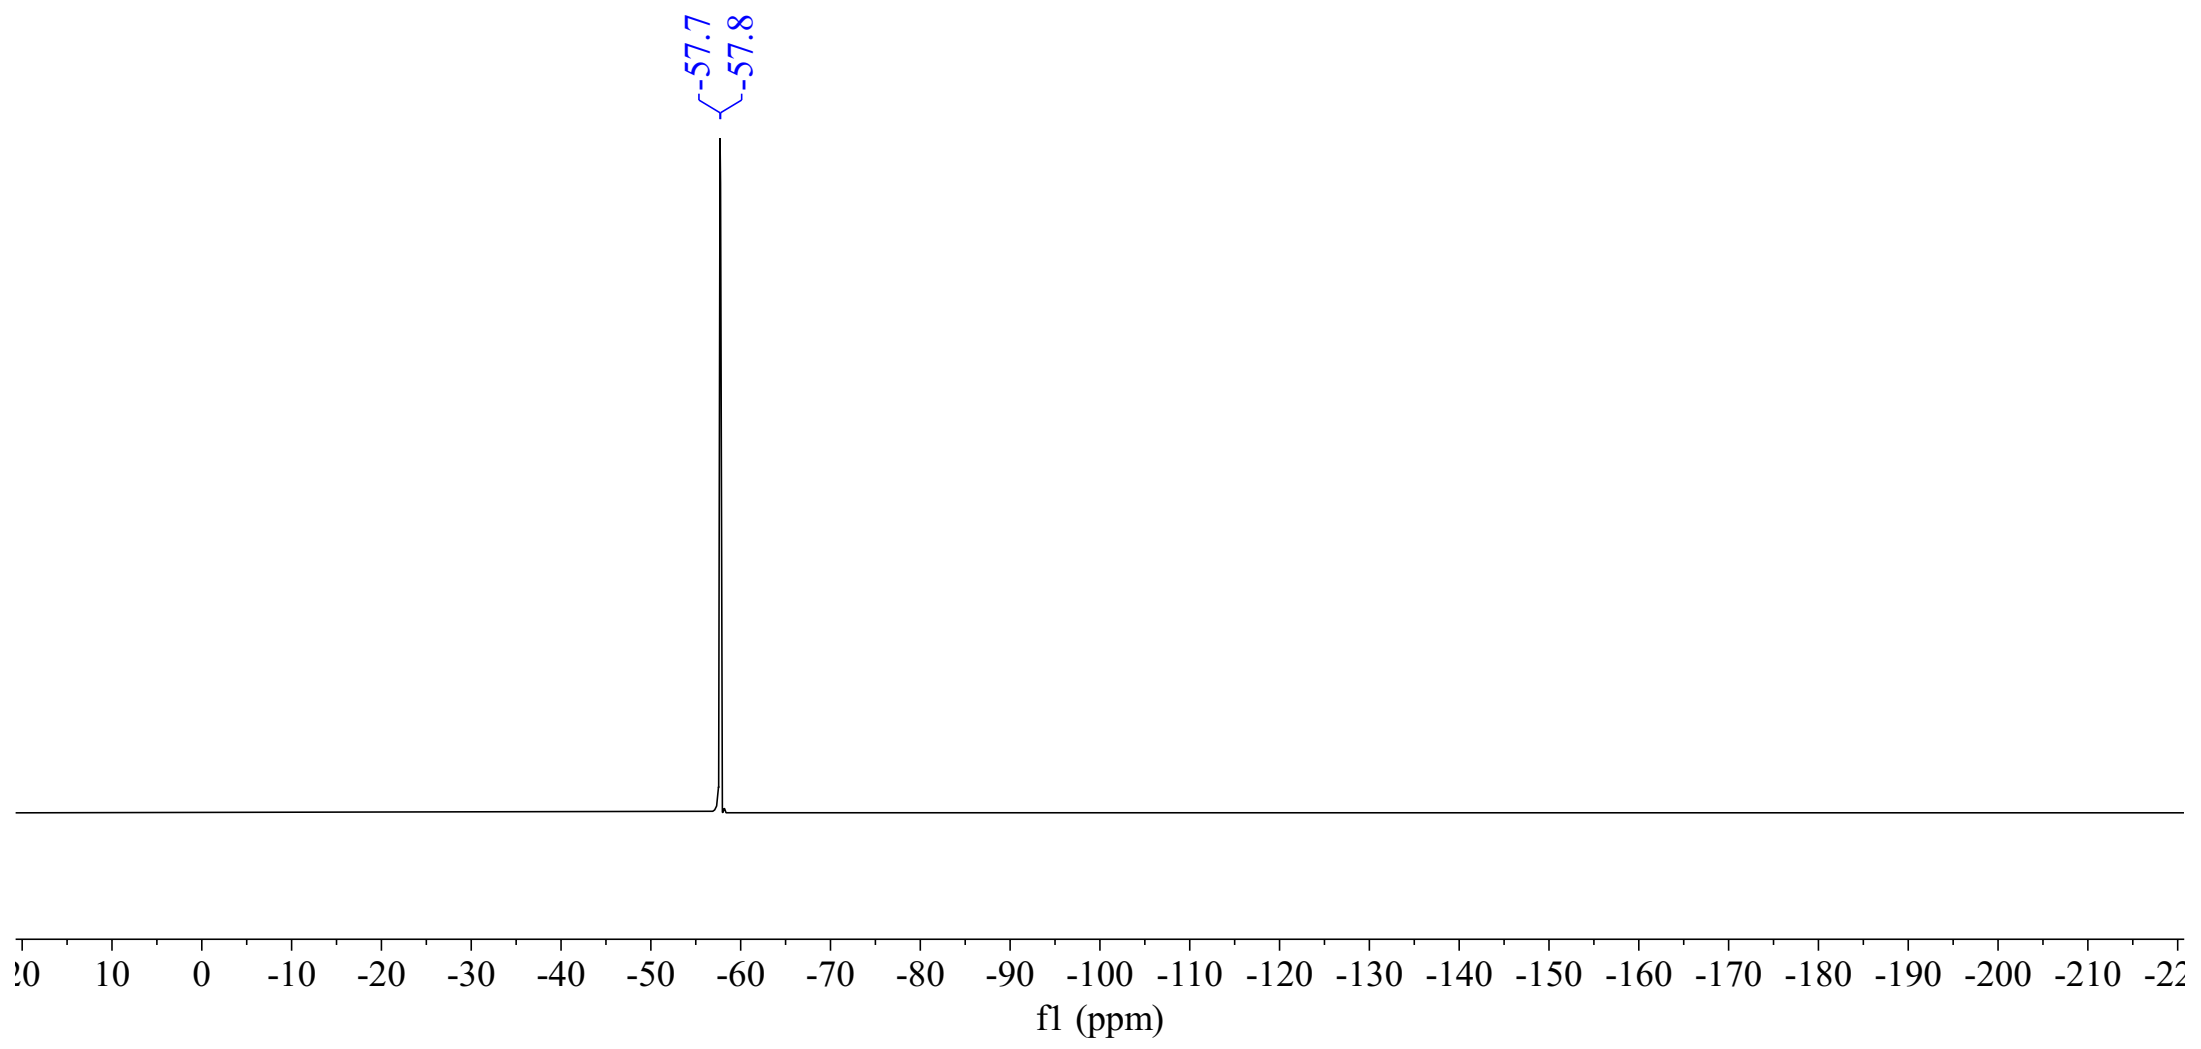

szp-302-CF3

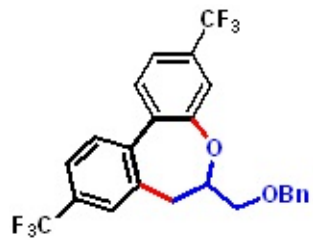

**3t**

<sup>1</sup>H NMR, CDCl<sub>3</sub>

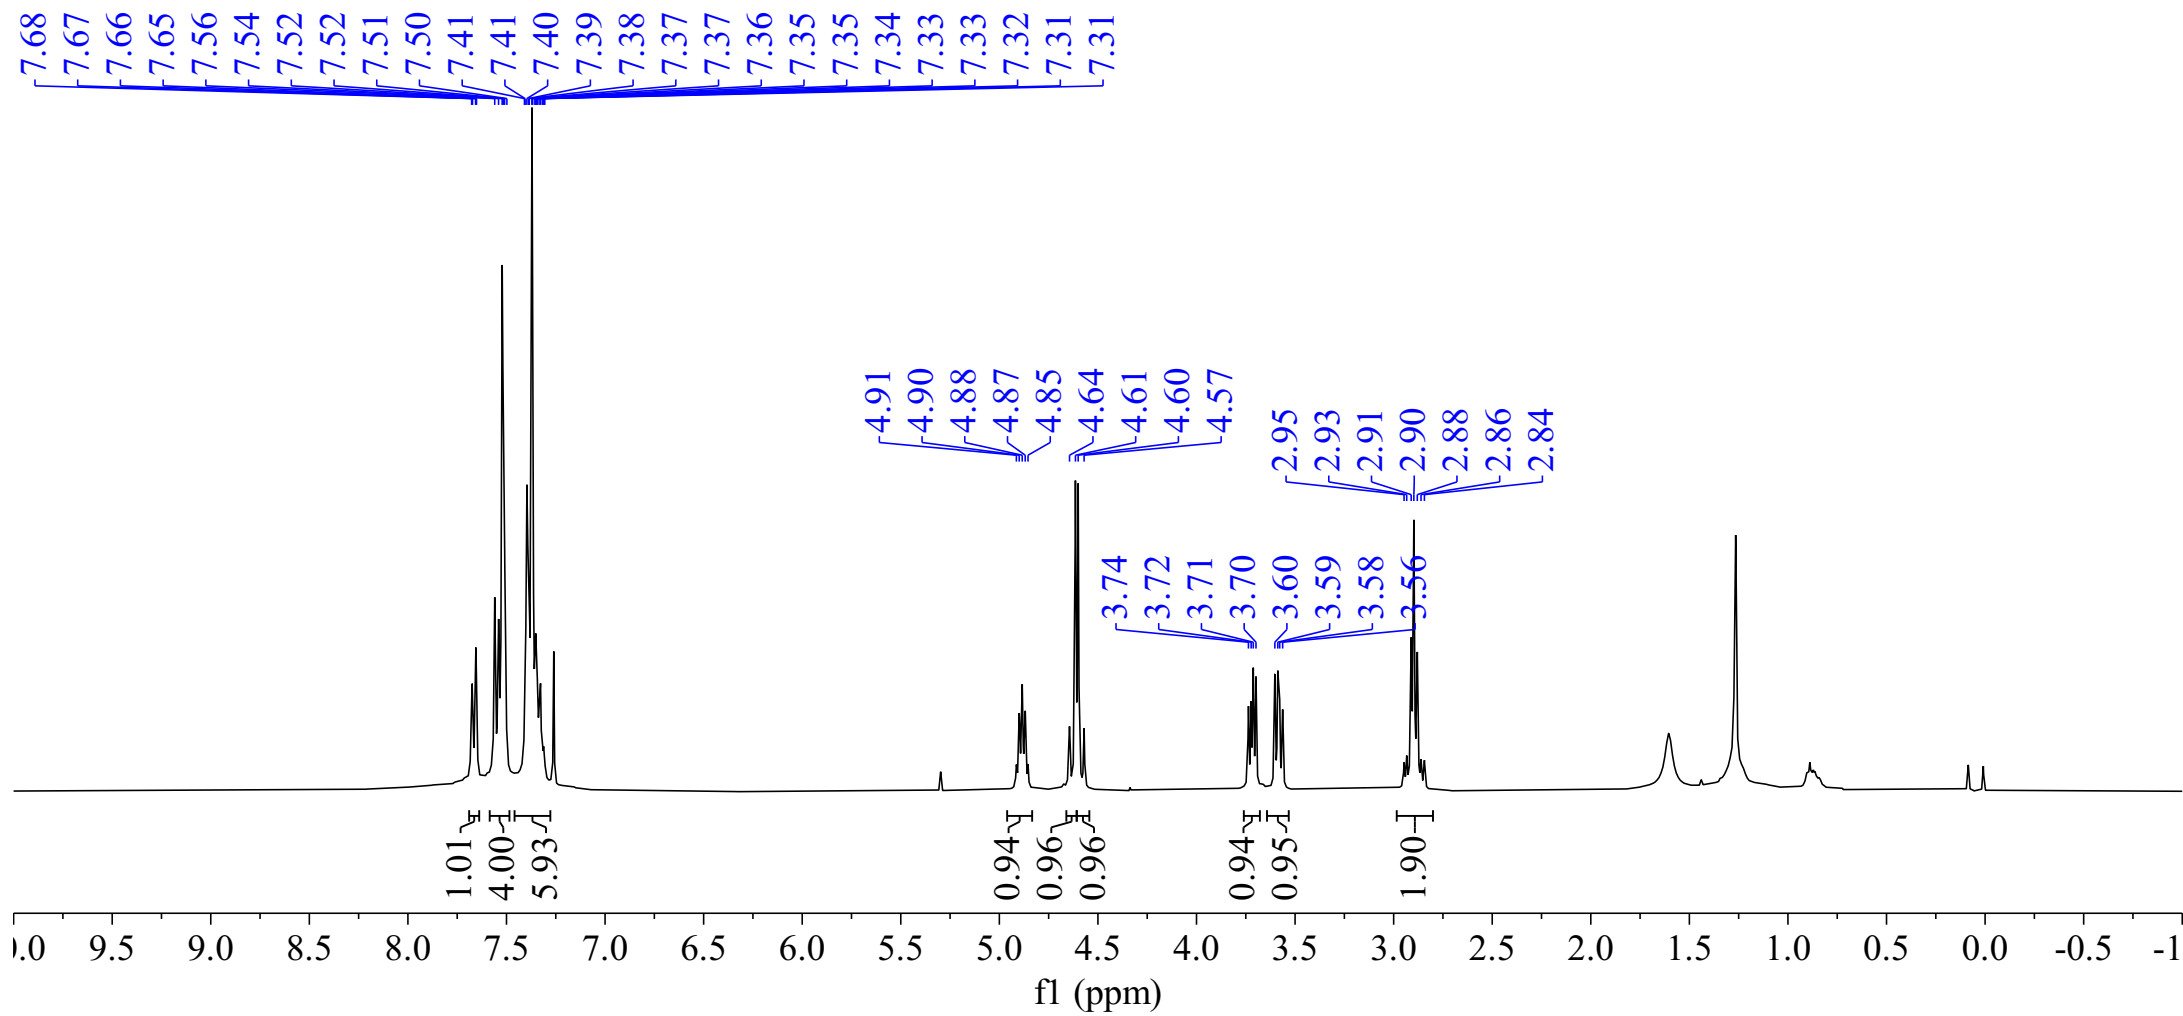

141.1  
137.9  
137.3  
137.1  
132.6  
132.2  
131.9  
131.5  
131.1  
130.7  
130.4  
129.9  
128.7  
128.2  
128.1  
128.0  
126.1  
126.1  
125.5  
125.2  
124.7  
124.6  
122.8  
122.5  
121.6  
121.6  
120.9  
120.9

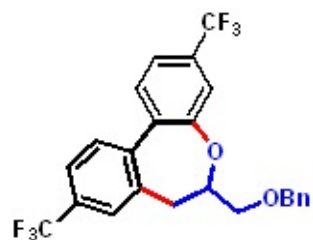**3t**

$^{13}\text{C}$  NMR,  $\text{CDCl}_3$

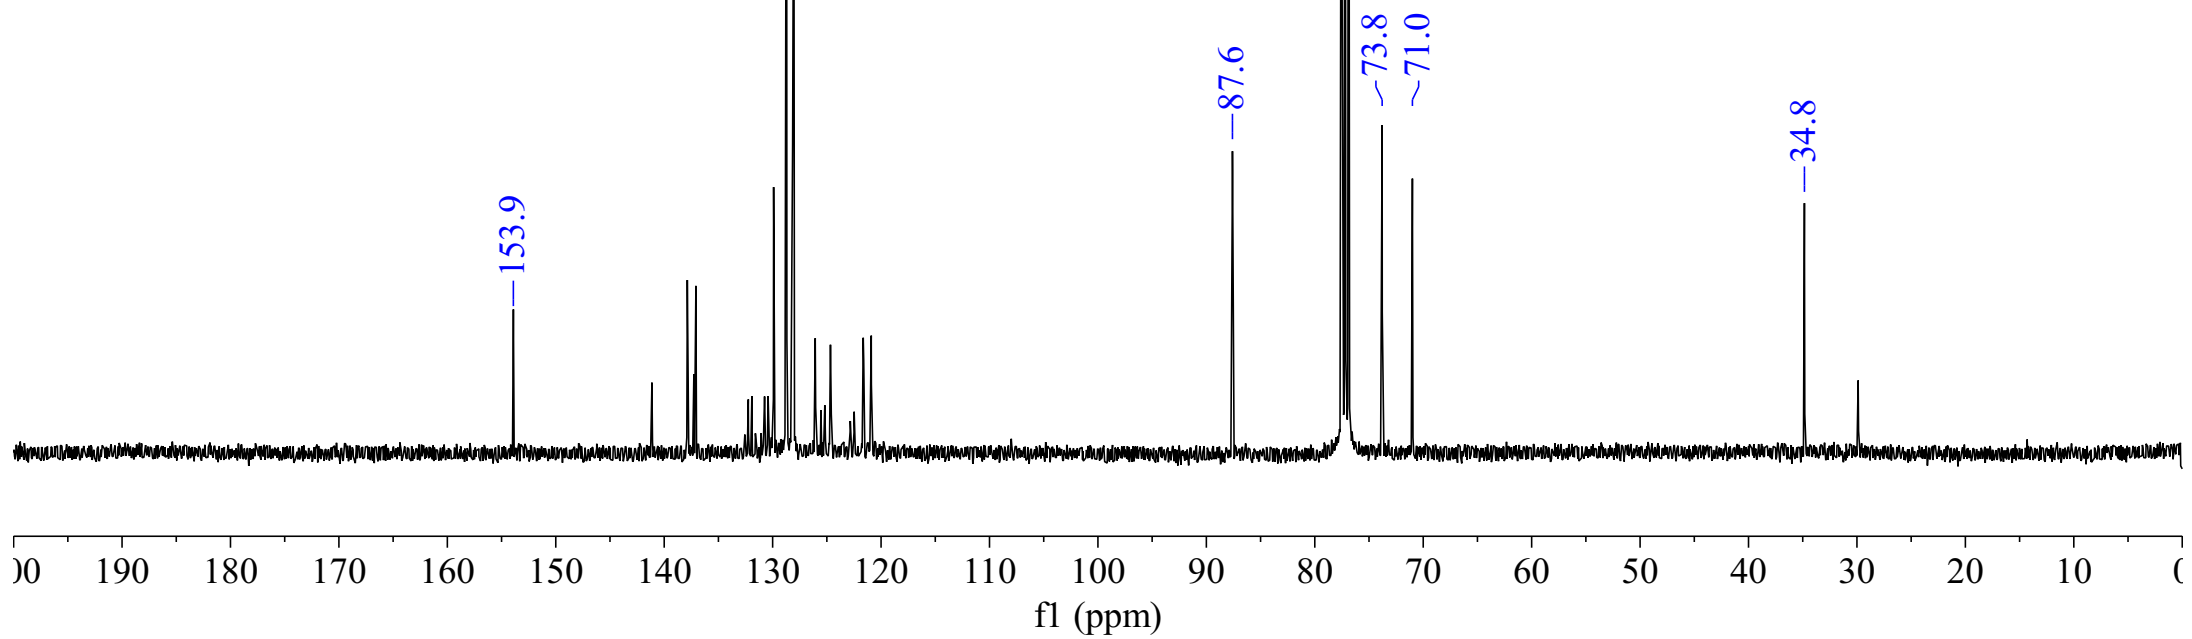

szp-302-CF3.3.fid

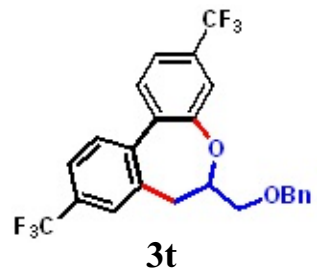

$^{19}\text{F}$  NMR,  $\text{CDCl}_3$

-62.4  
-62.5

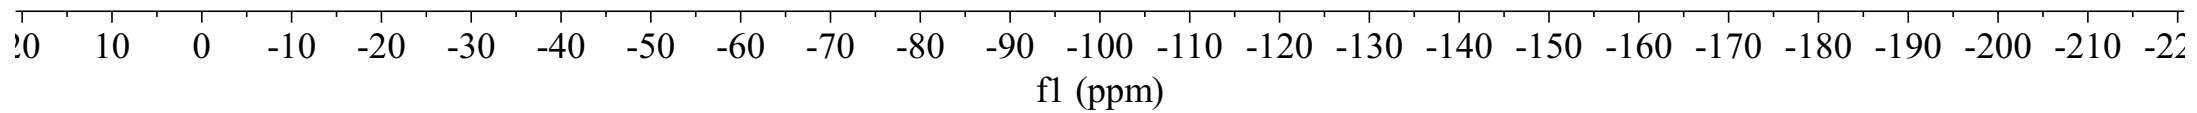



szp-279-1

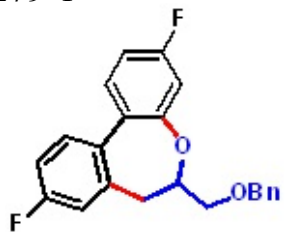

**3u**

$^1\text{H NMR}$ ,  $\text{CDCl}_3$

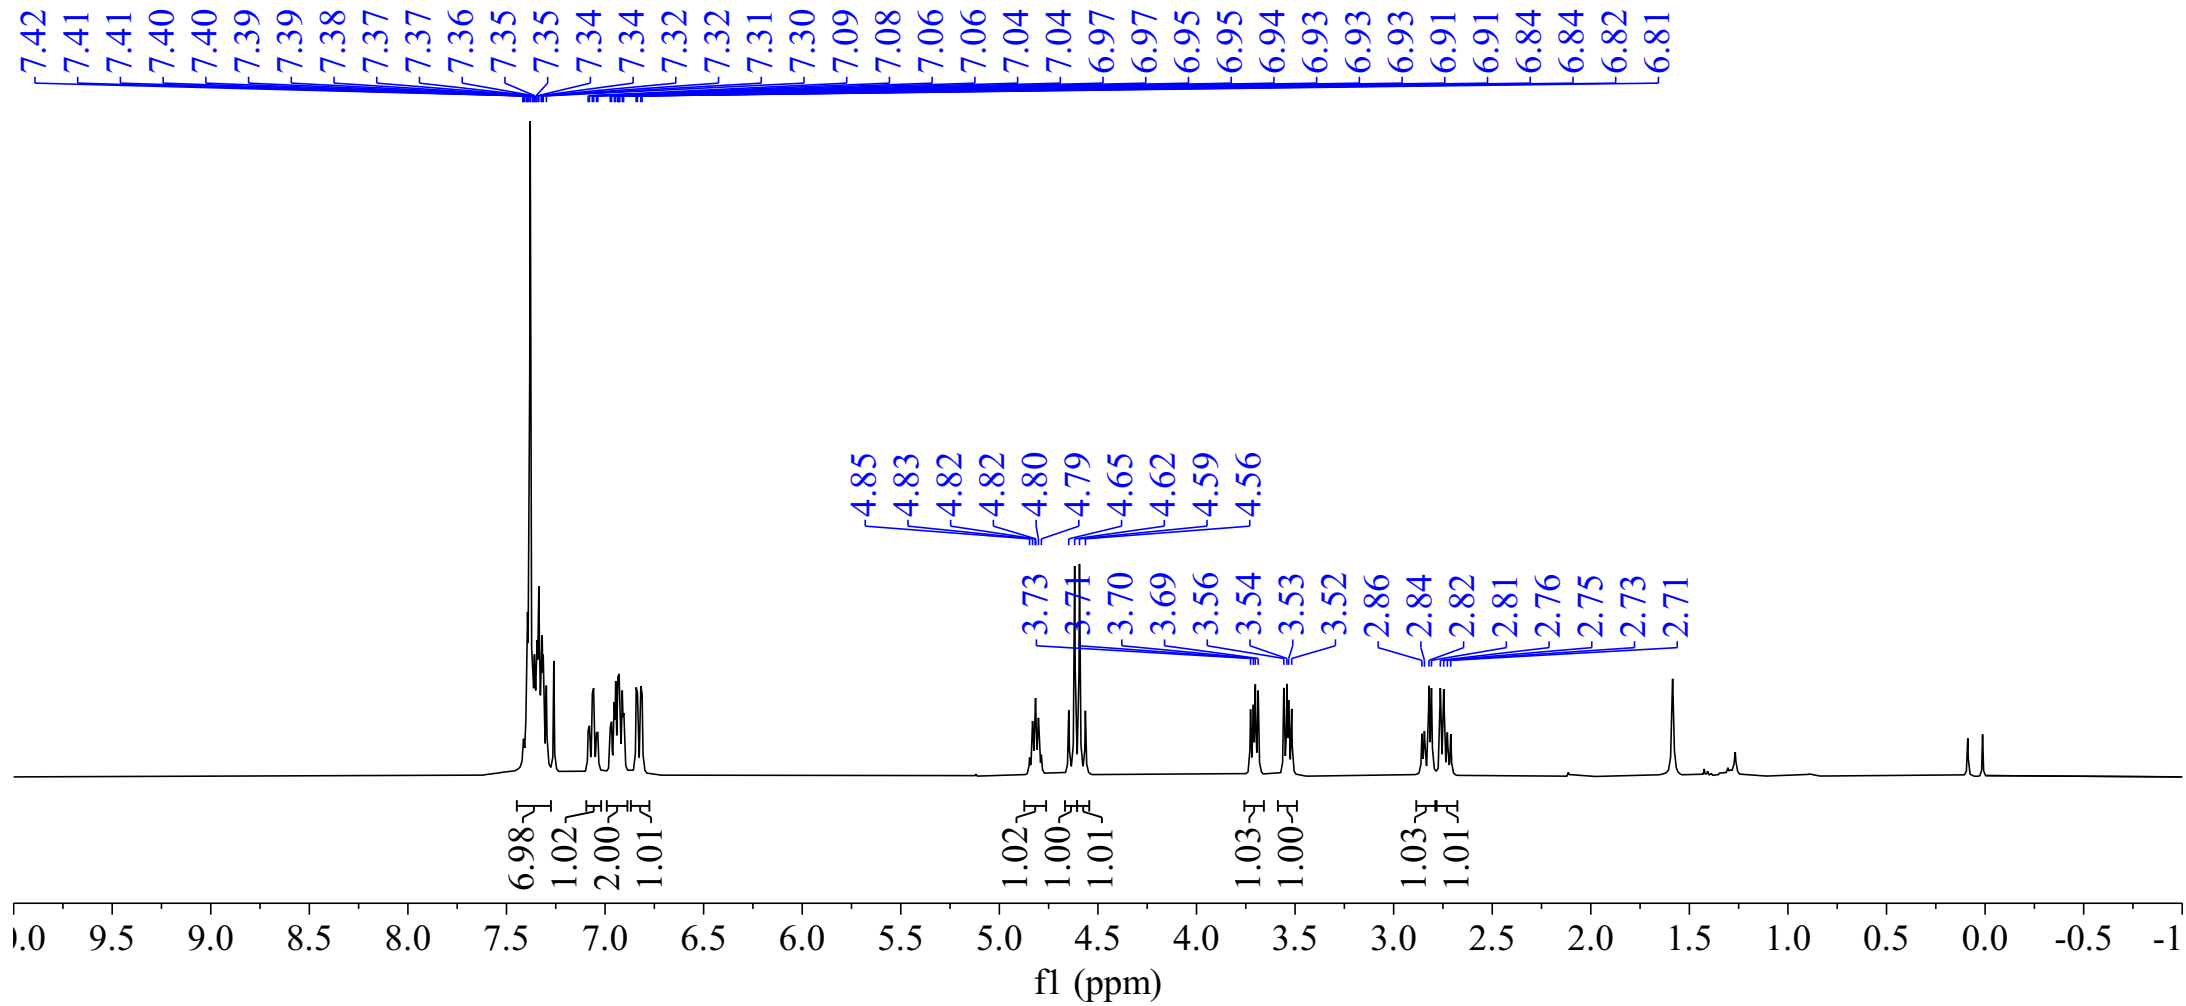

szp-279-1.2.fid

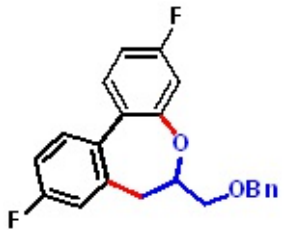

**3u**

$^{13}\text{C}$  NMR,  $\text{CDCl}_3$

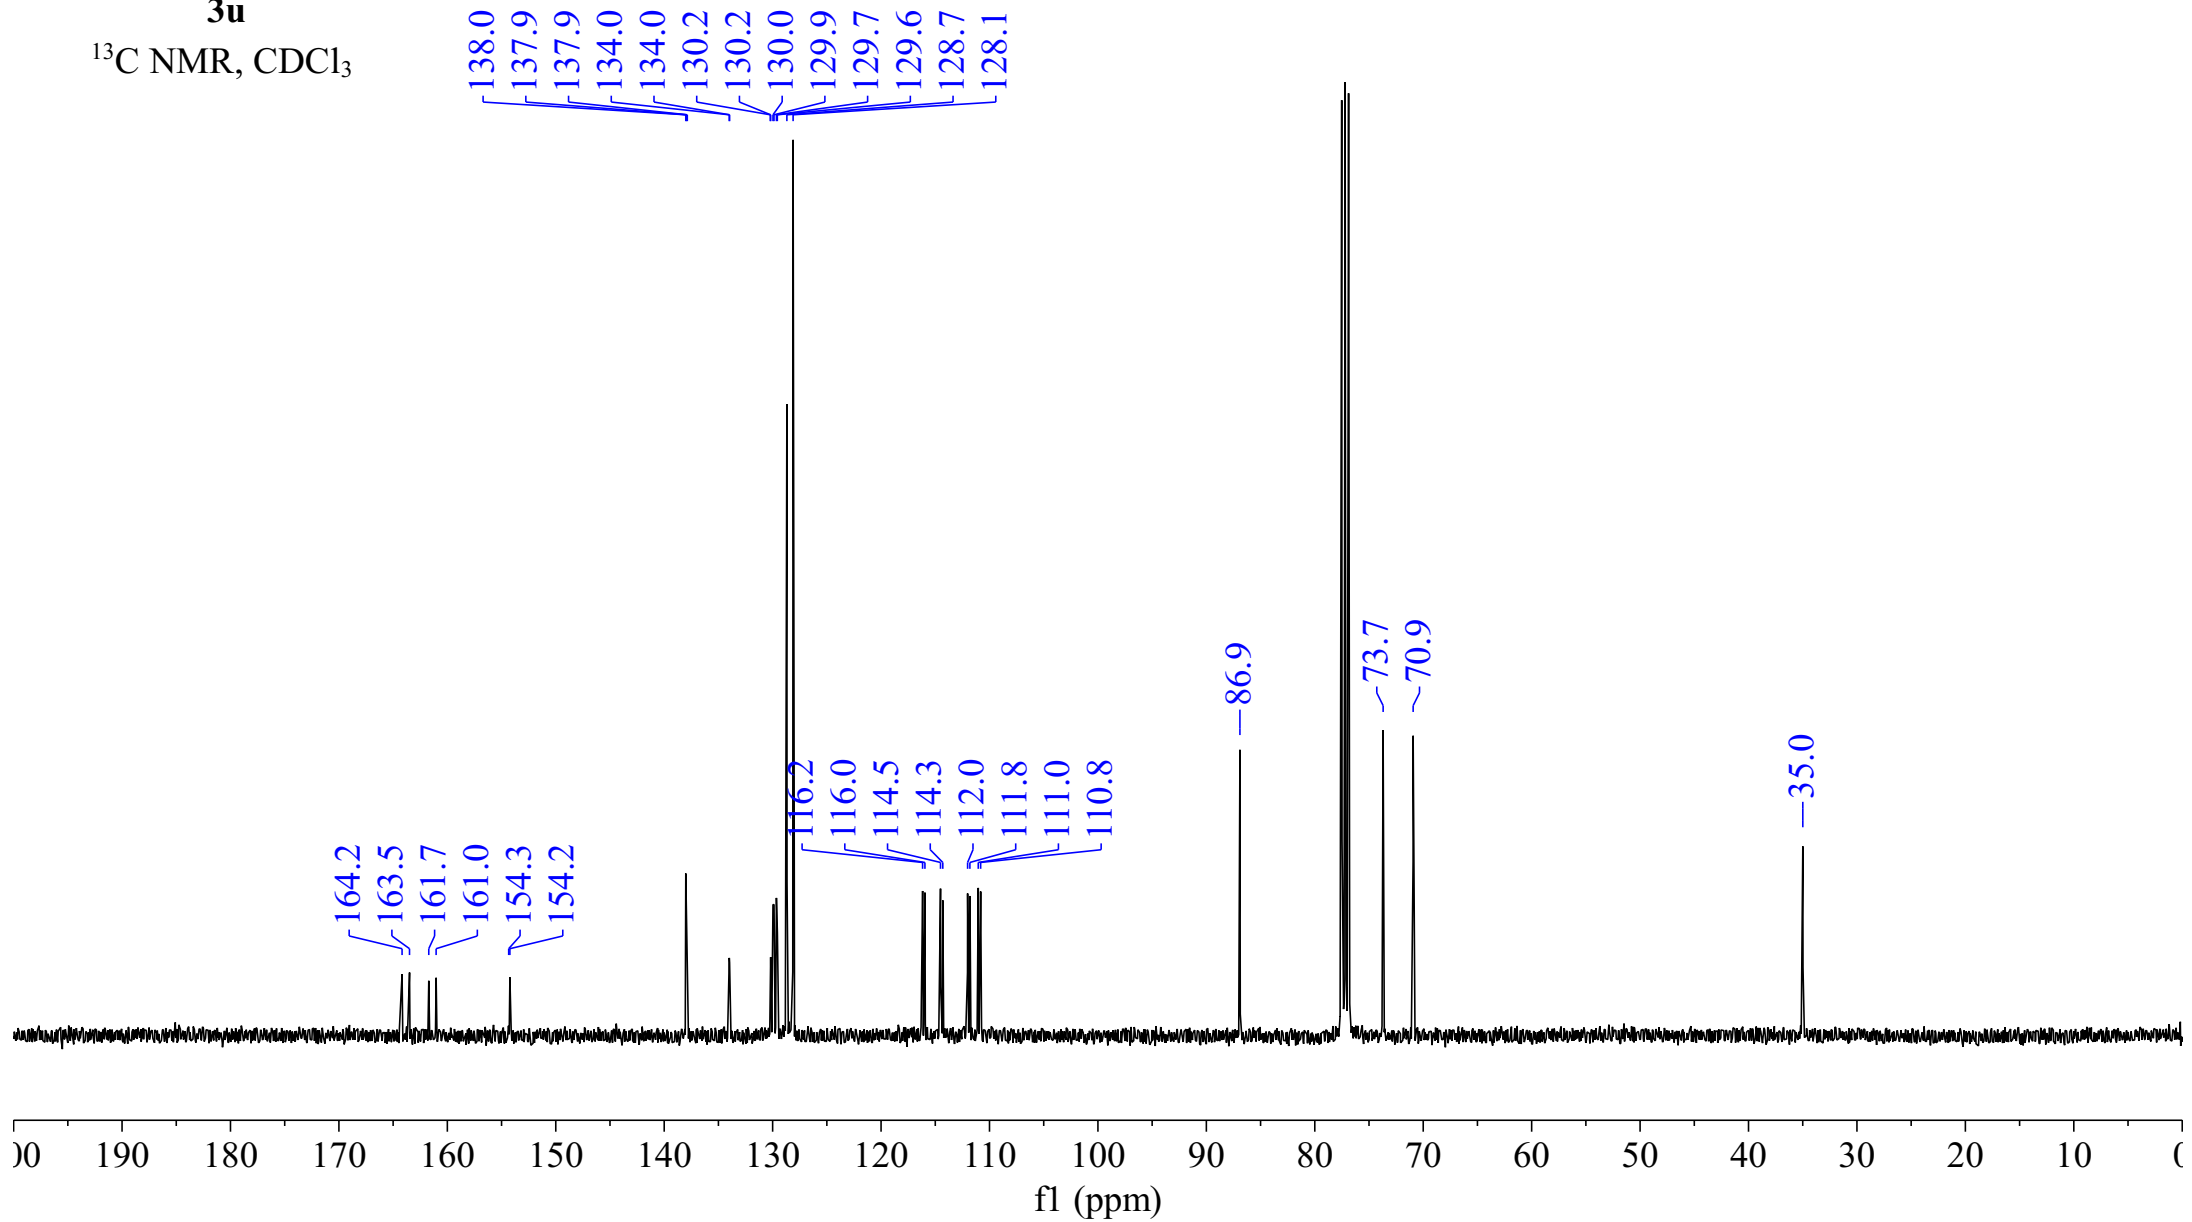

szp-279-1.3.fid

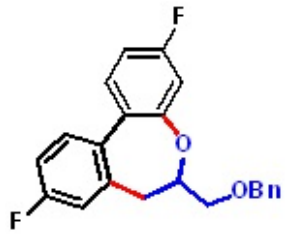

**3u**

$^{19}\text{F}$  NMR,  $\text{CDCl}_3$

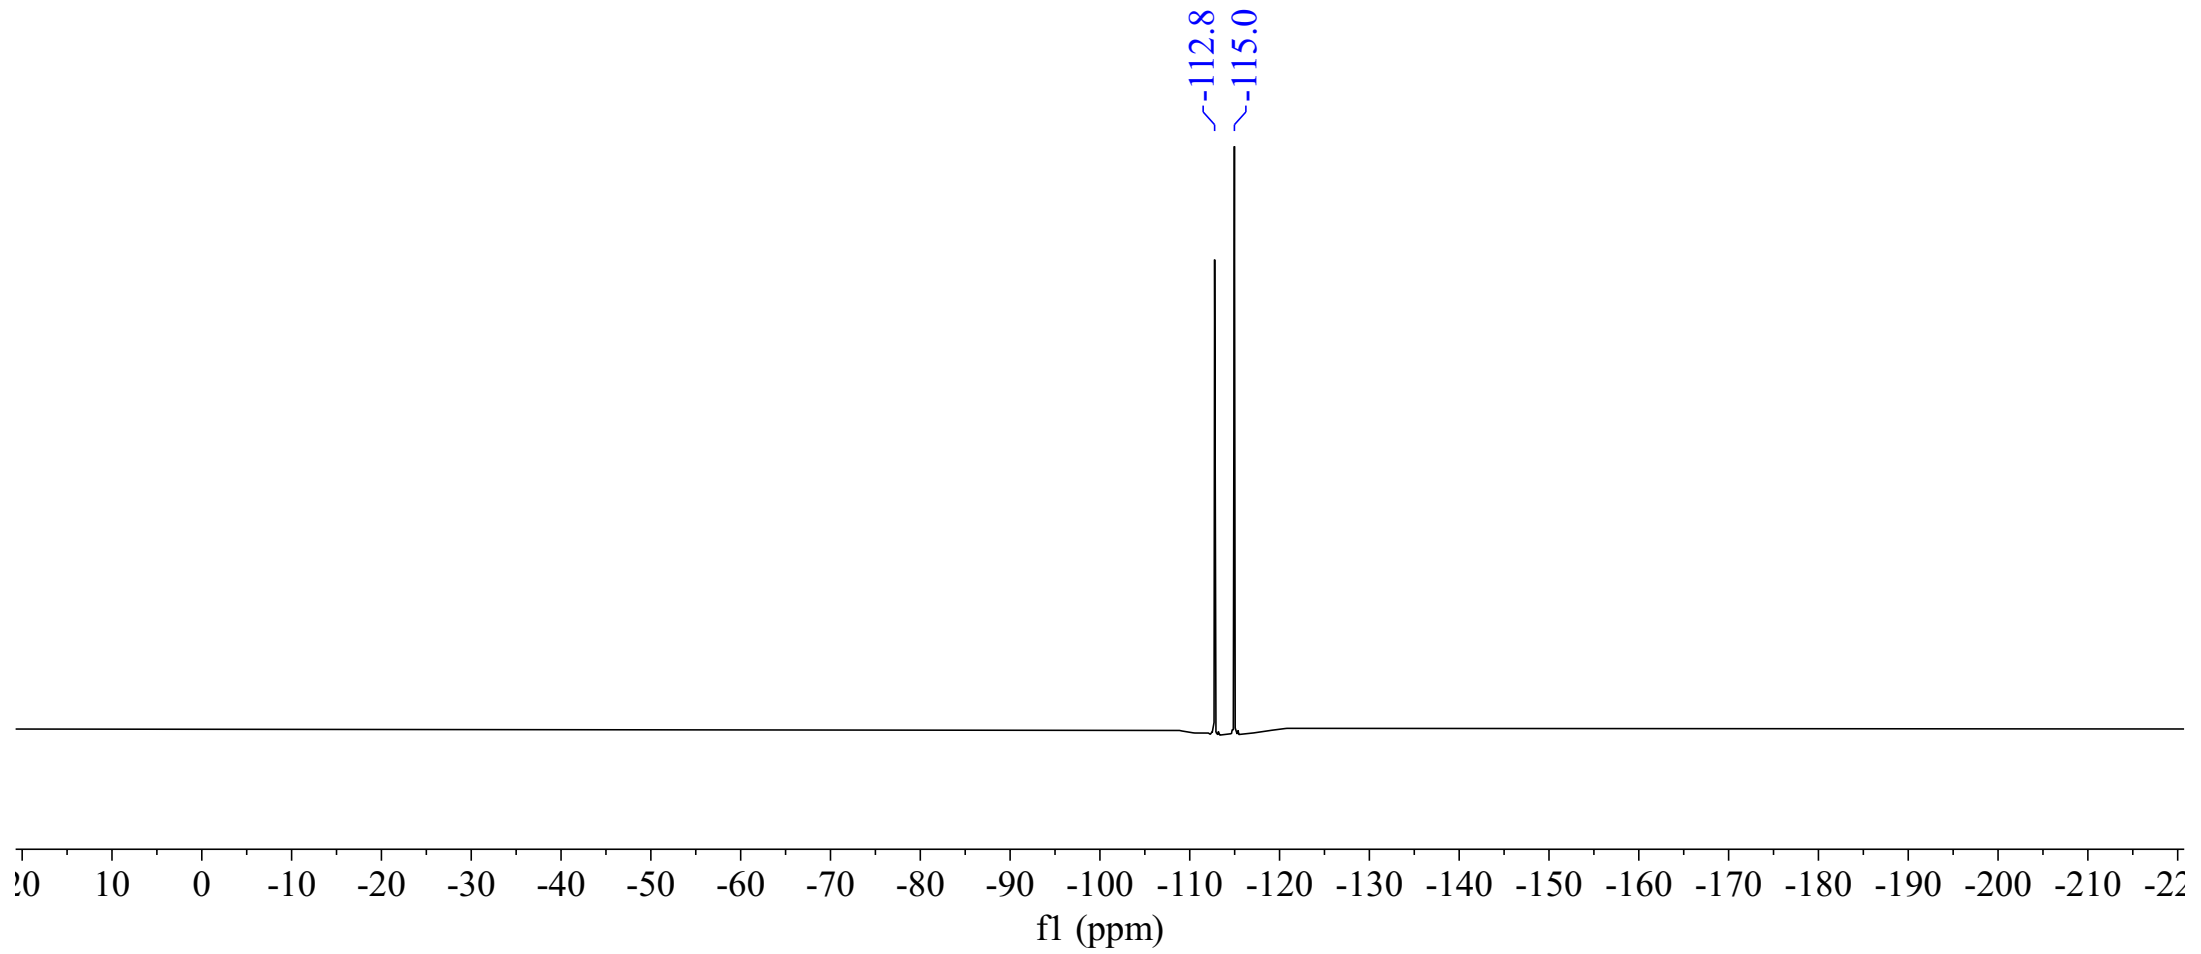

szp-273-2

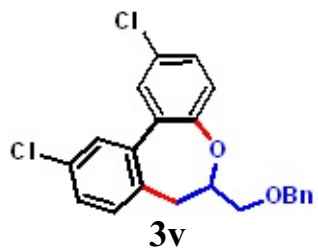

$^1\text{H NMR}$ ,  $\text{CDCl}_3$

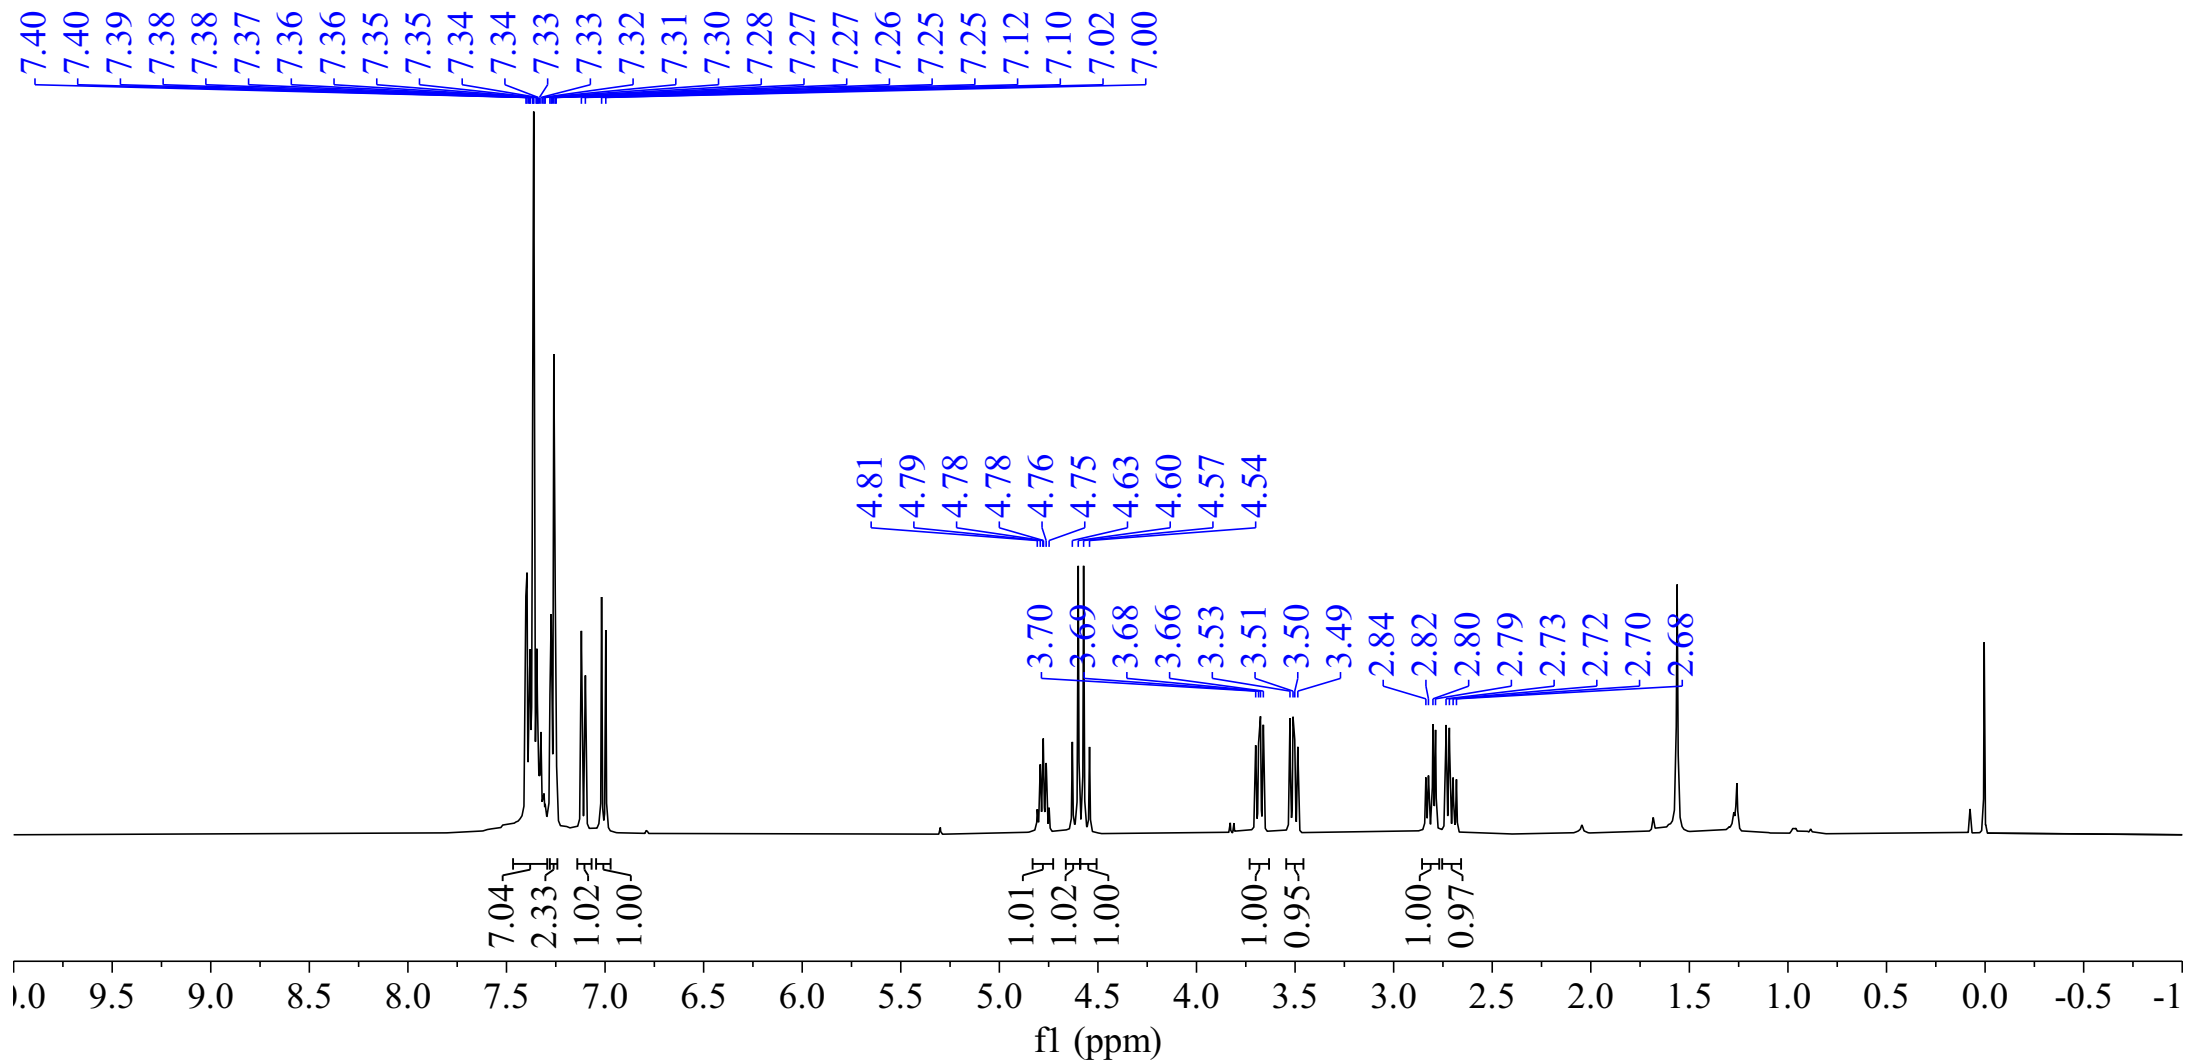

szp-273-2.2.fid

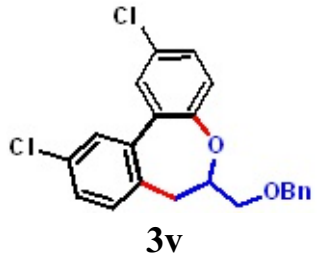

$^{13}\text{C}$  NMR,  $\text{CDCl}_3$

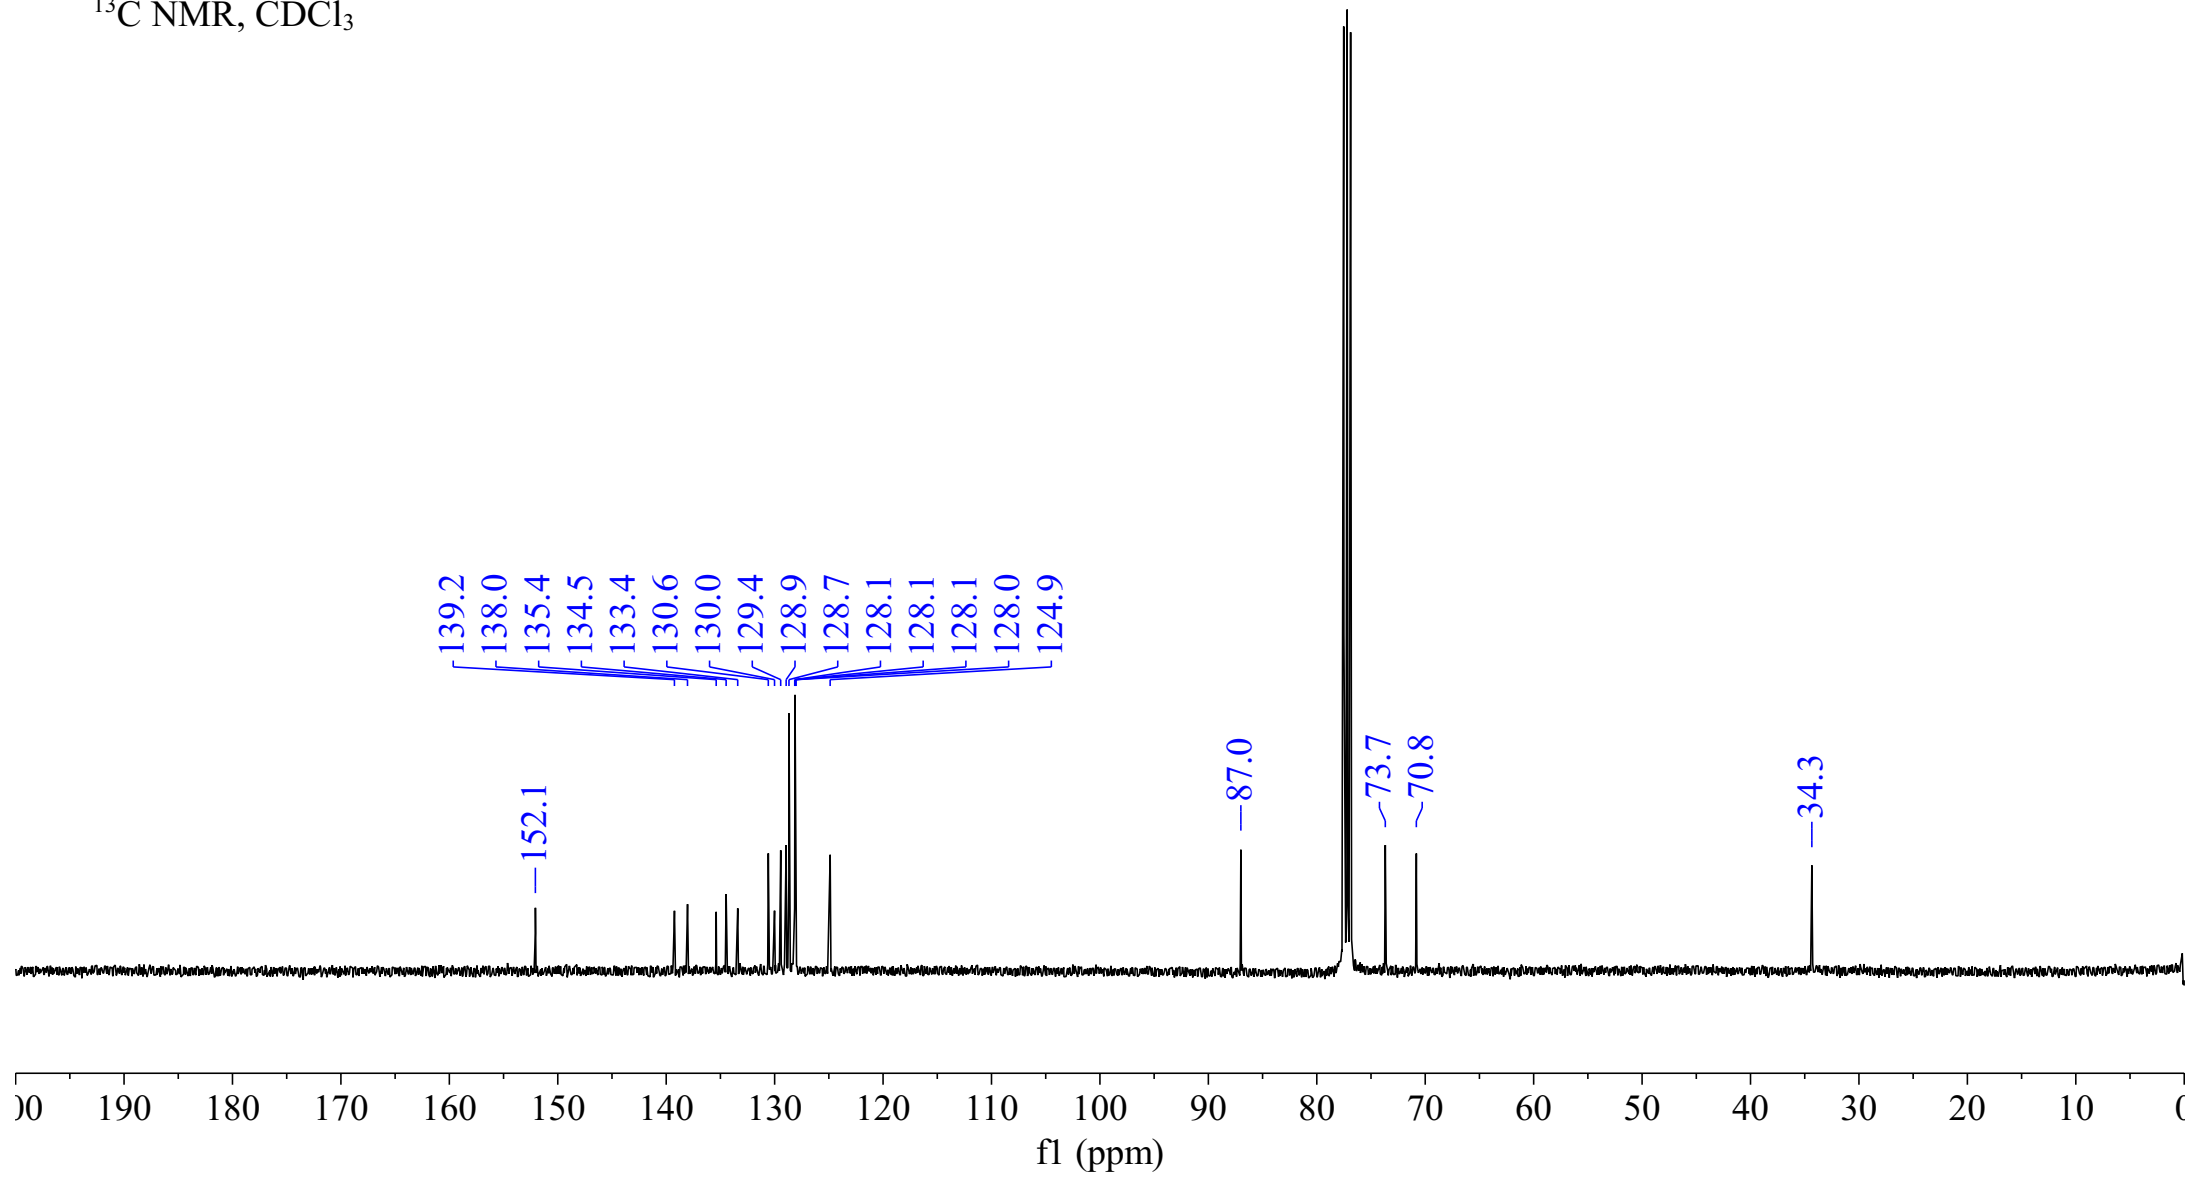

szp-242-11.1.fid

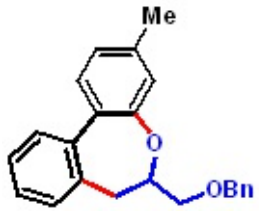

3w

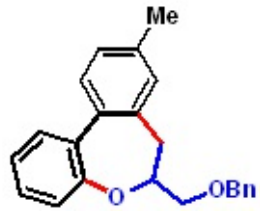

3w'

<sup>1</sup>H NMR, CDCl<sub>3</sub>

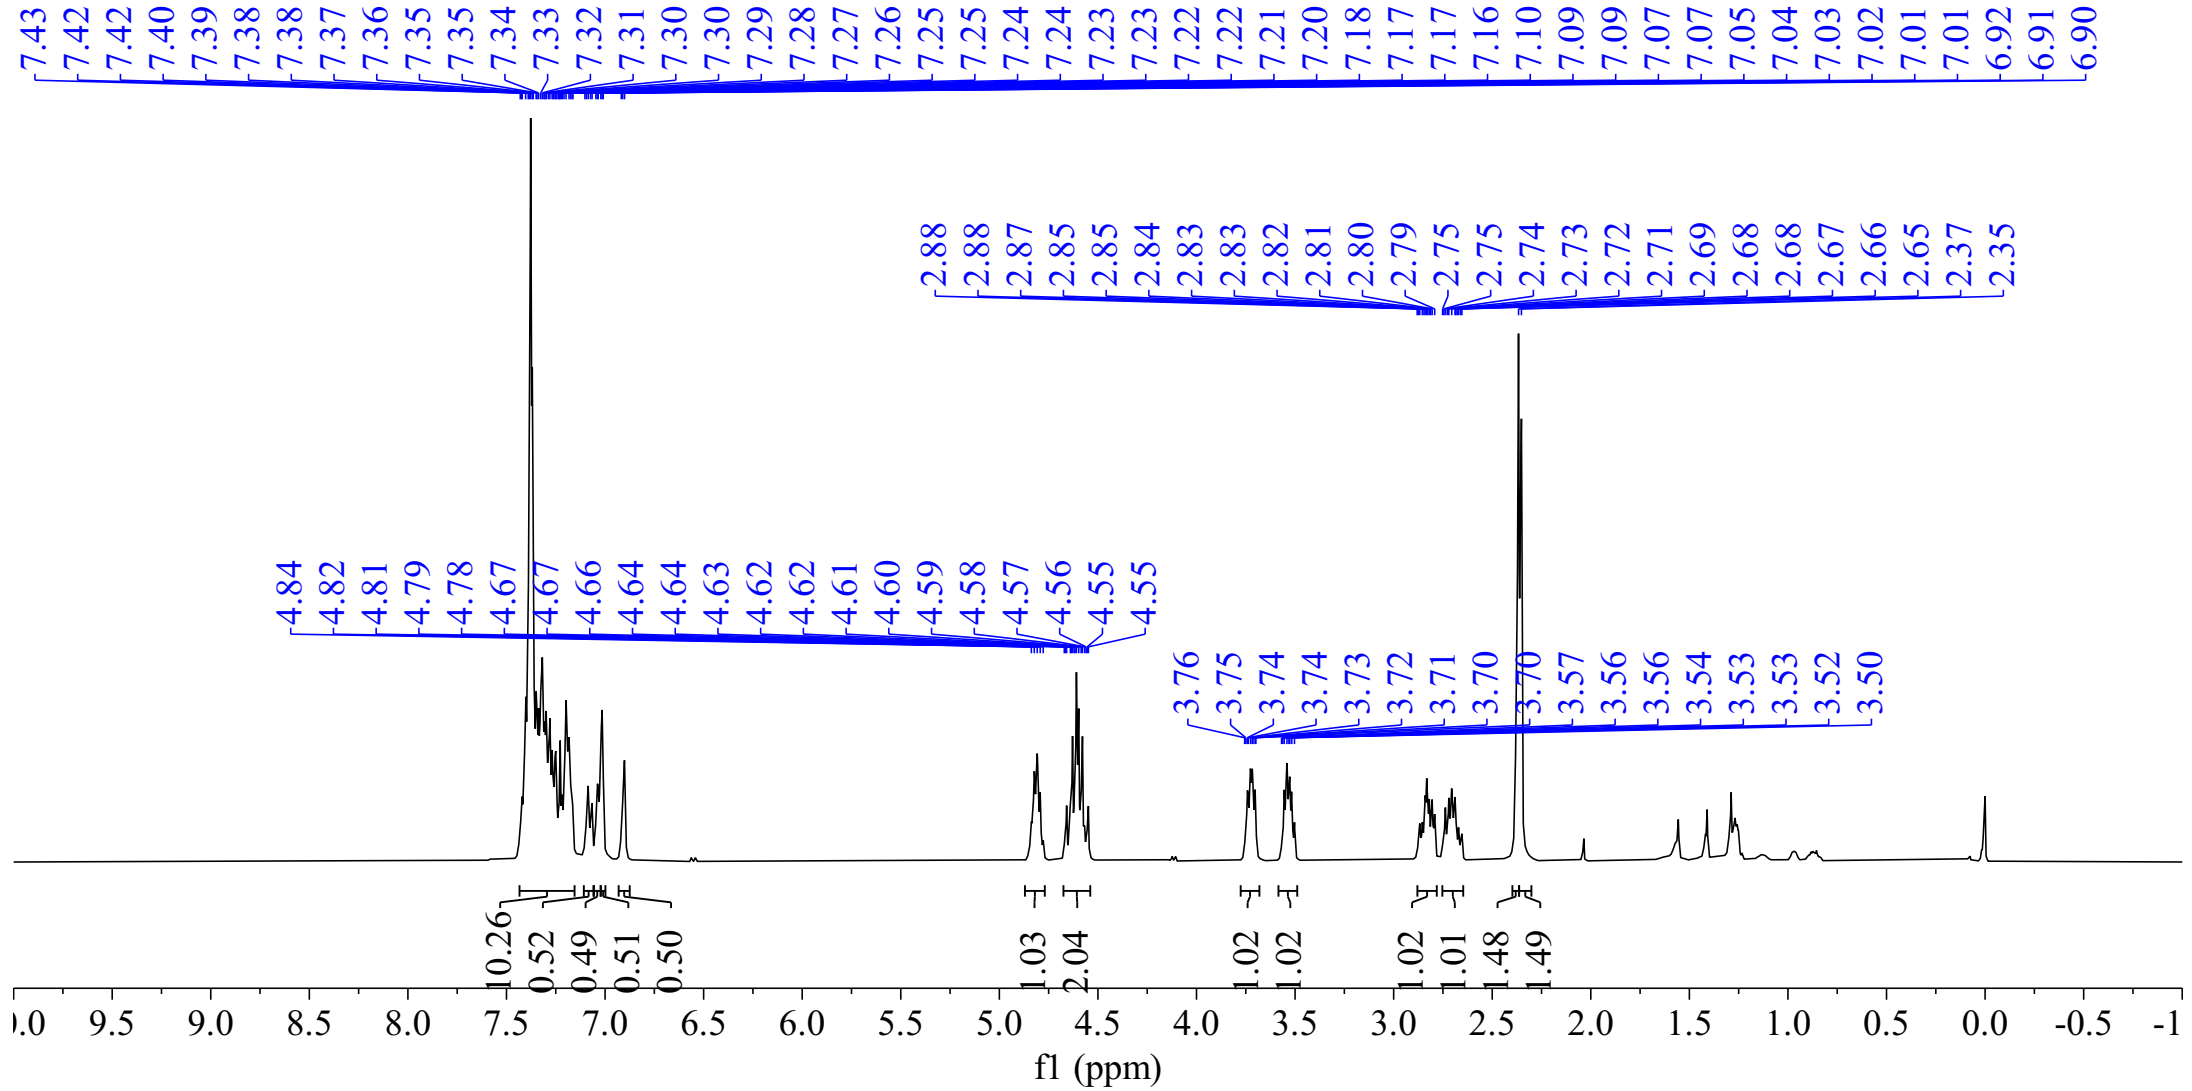

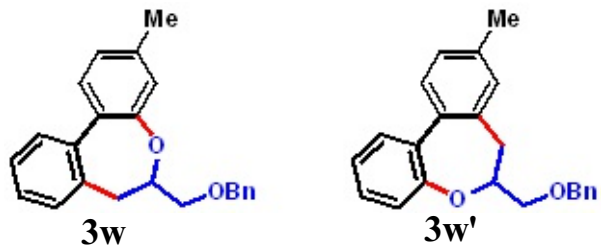

$^{13}\text{C}$  NMR,  $\text{CDCl}_3$

139.2  
138.9  
138.3  
137.5  
136.0  
135.9  
135.9  
135.2  
132.0  
129.9  
129.2  
129.1  
129.0  
128.7  
128.6  
128.2  
128.1  
128.0  
128.0  
127.9  
127.5  
127.4  
125.5  
124.7  
124.0  
123.3

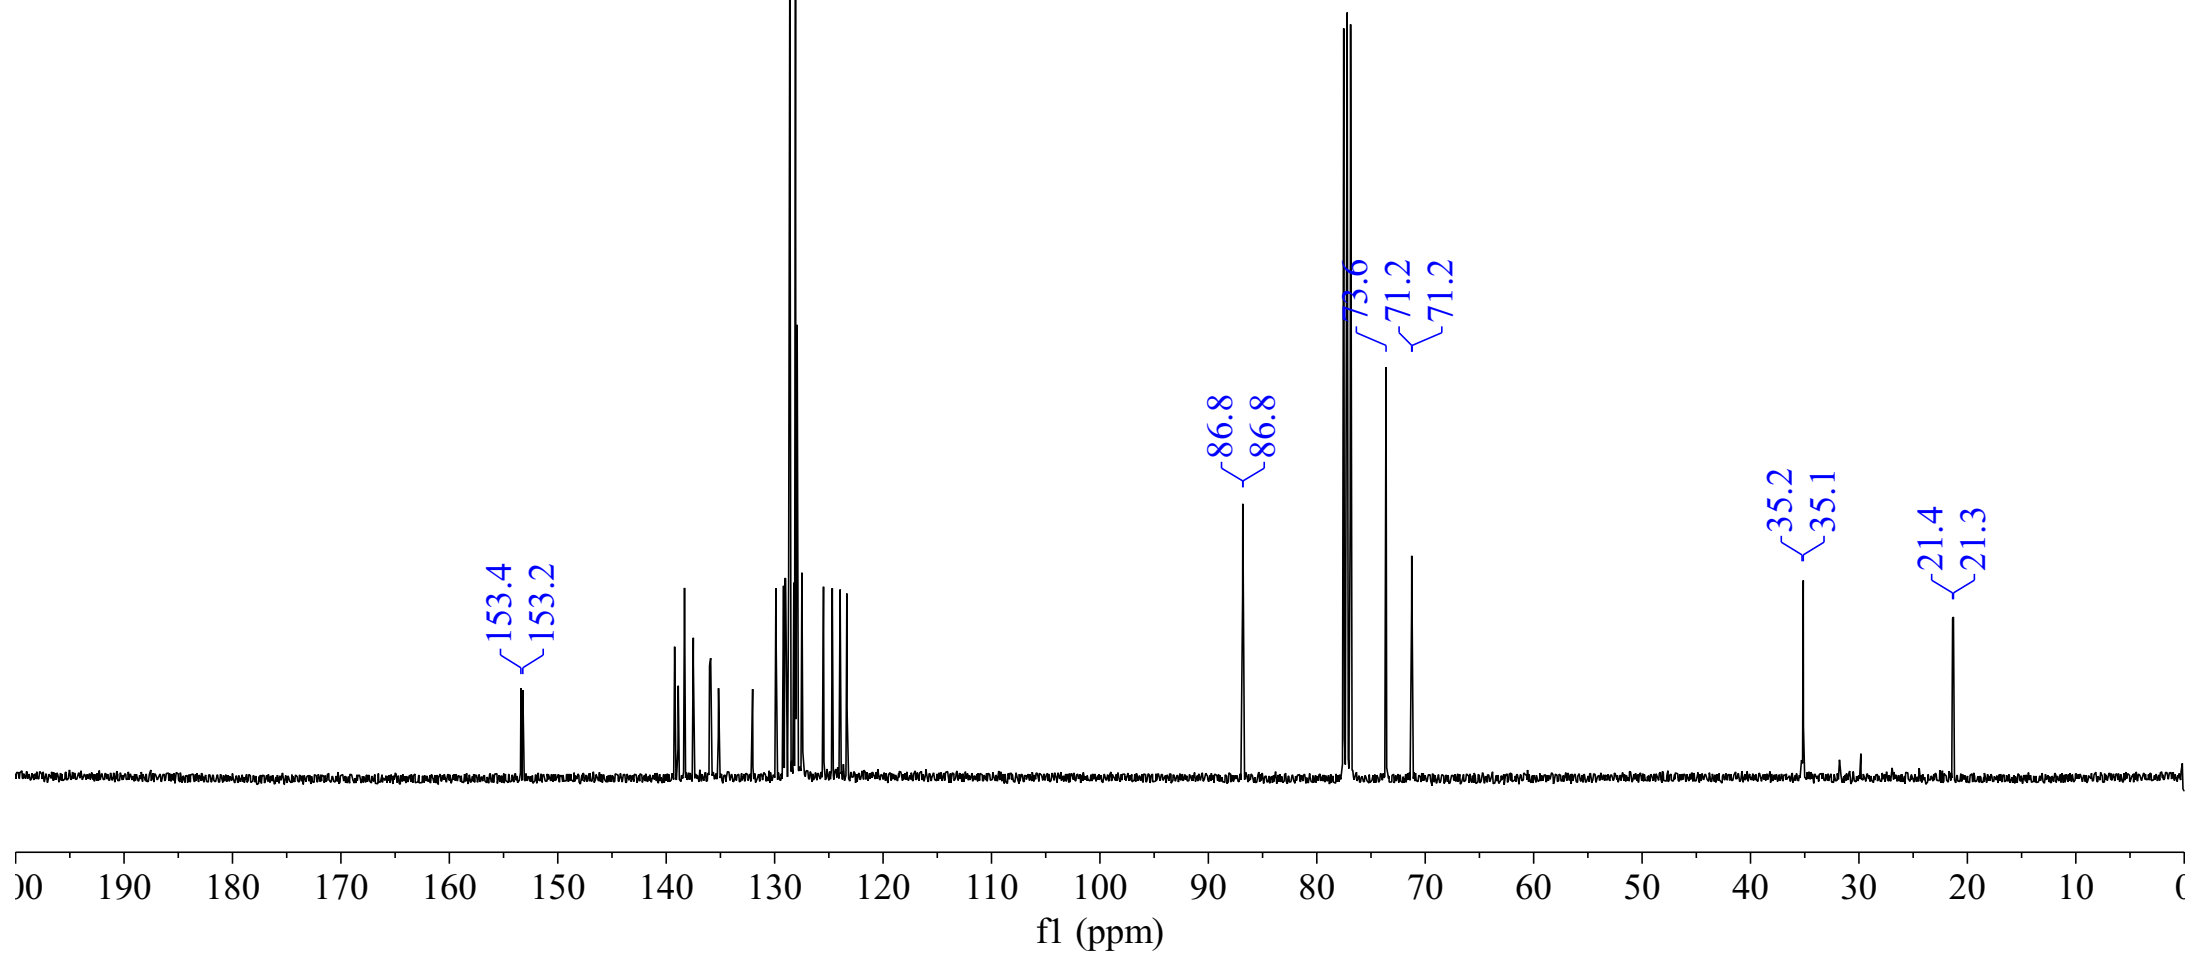

szp-262-113.1.fid

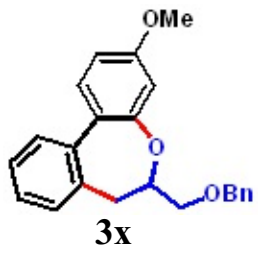

$^1\text{H NMR}$ ,  $\text{CDCl}_3$

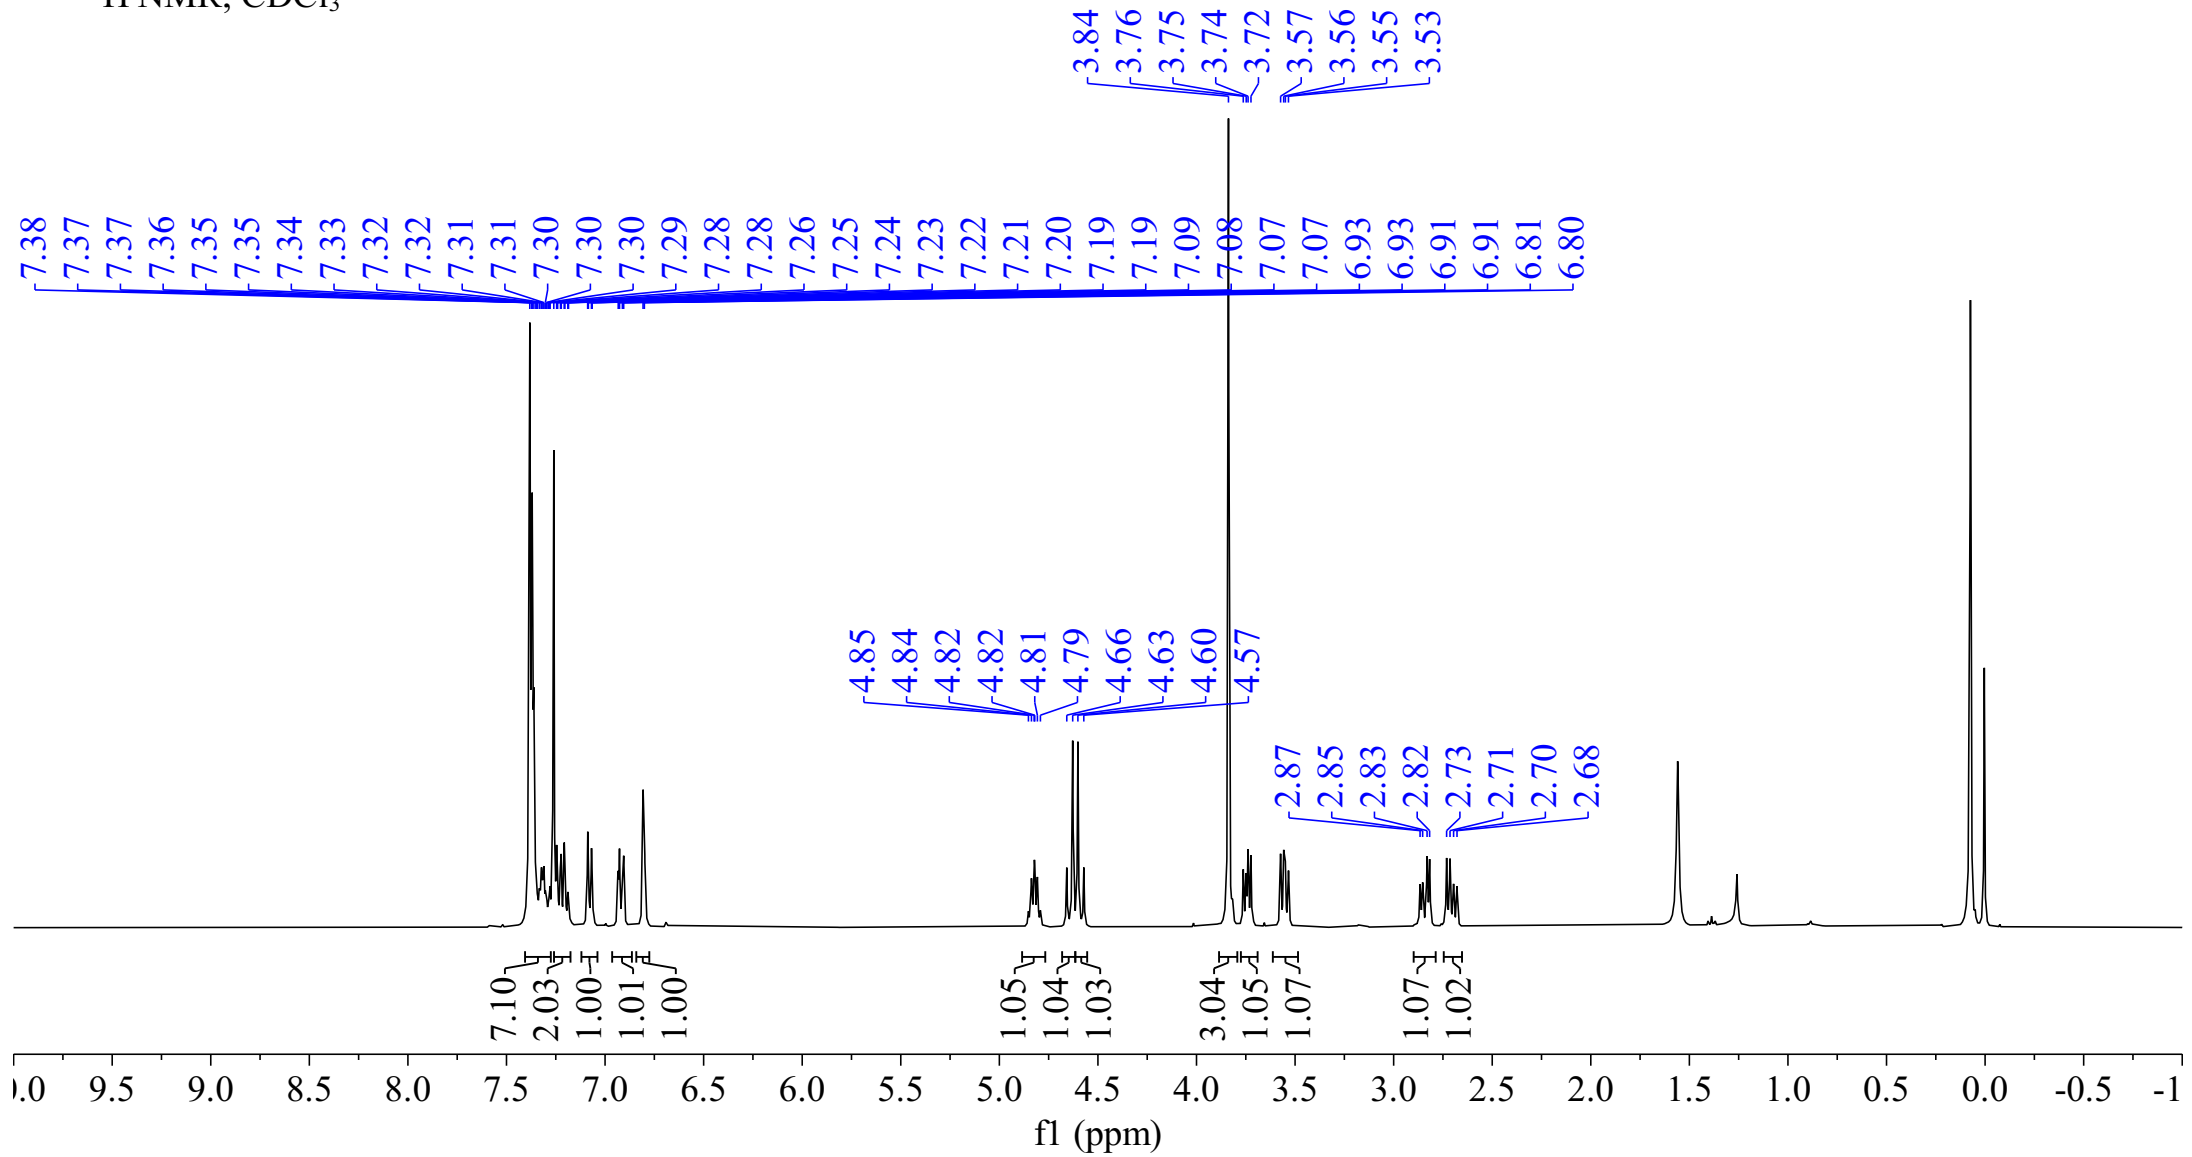



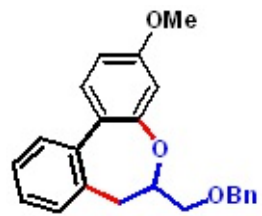

**3x**

$^{13}\text{C}$  NMR,  $\text{CDCl}_3$

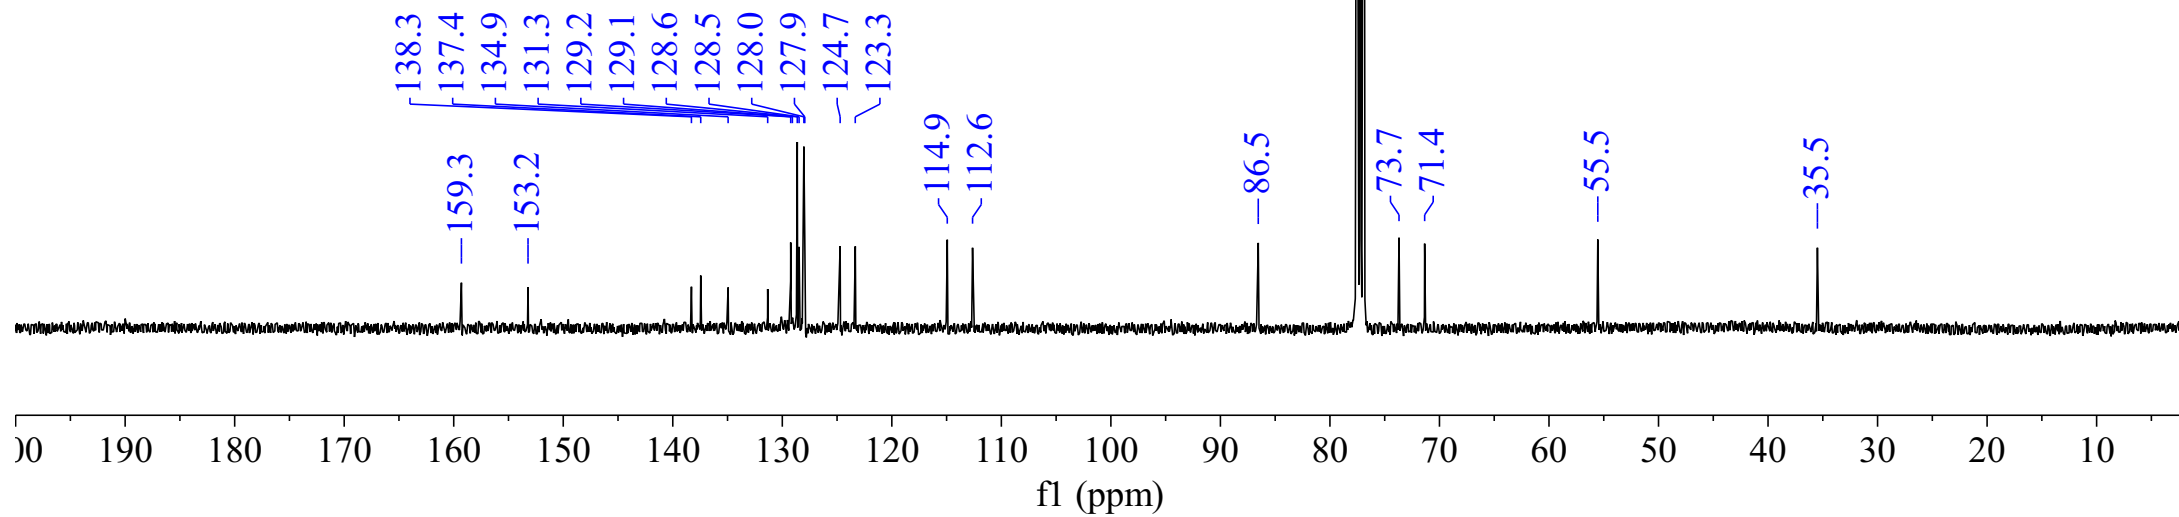

szp-262-111.1.fid

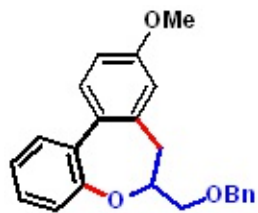

3x'

<sup>1</sup>H NMR, CDCl<sub>3</sub>

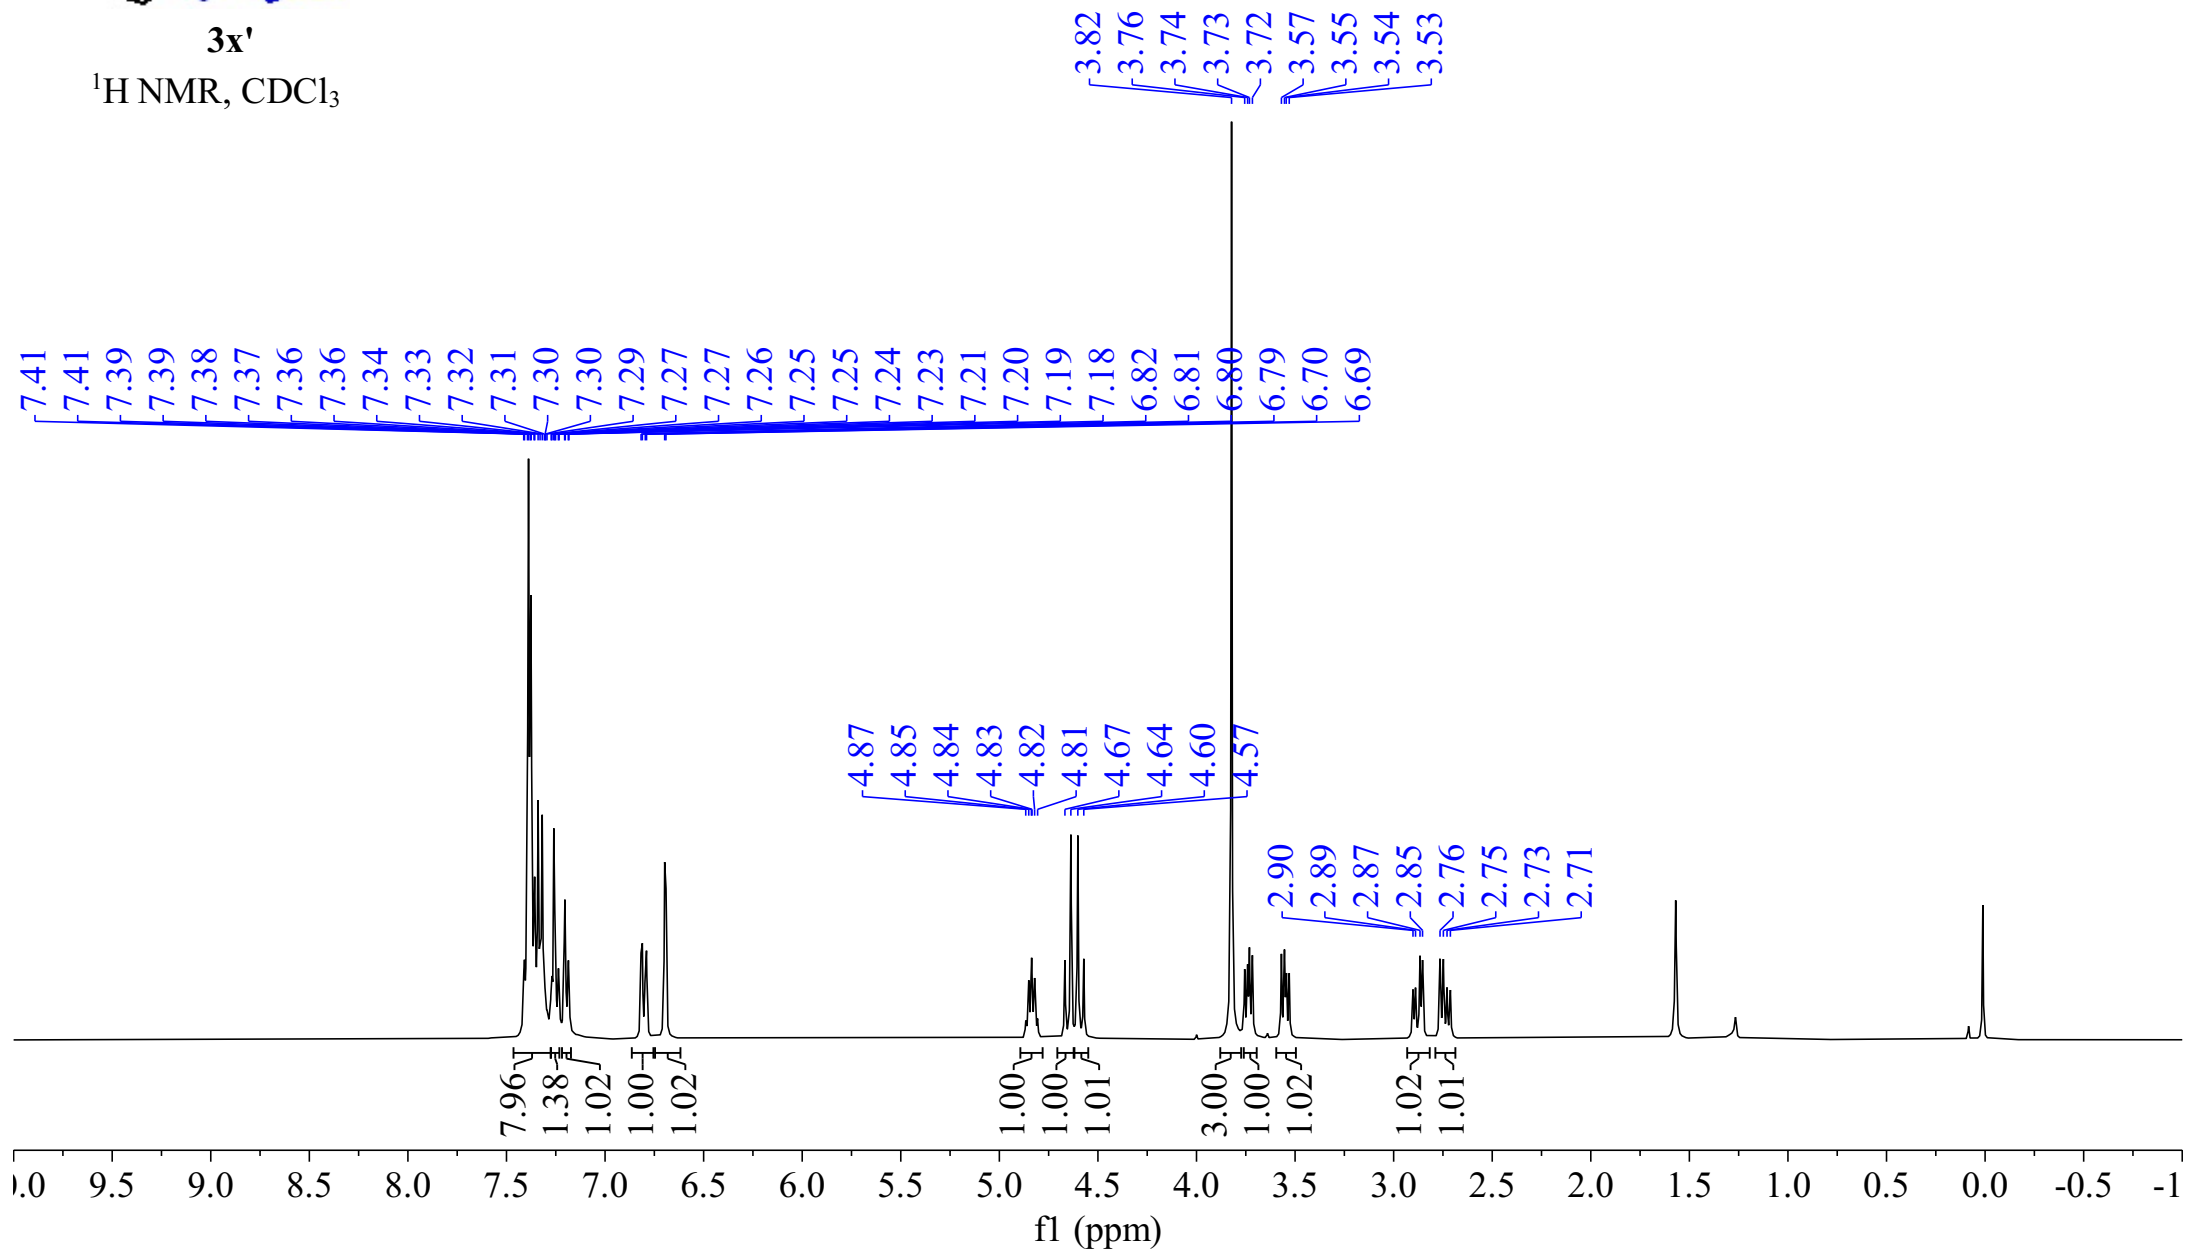

szp-262-111.2.fid

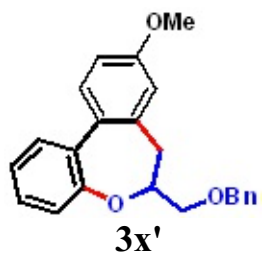

$^{13}\text{C}$  NMR,  $\text{CDCl}_3$

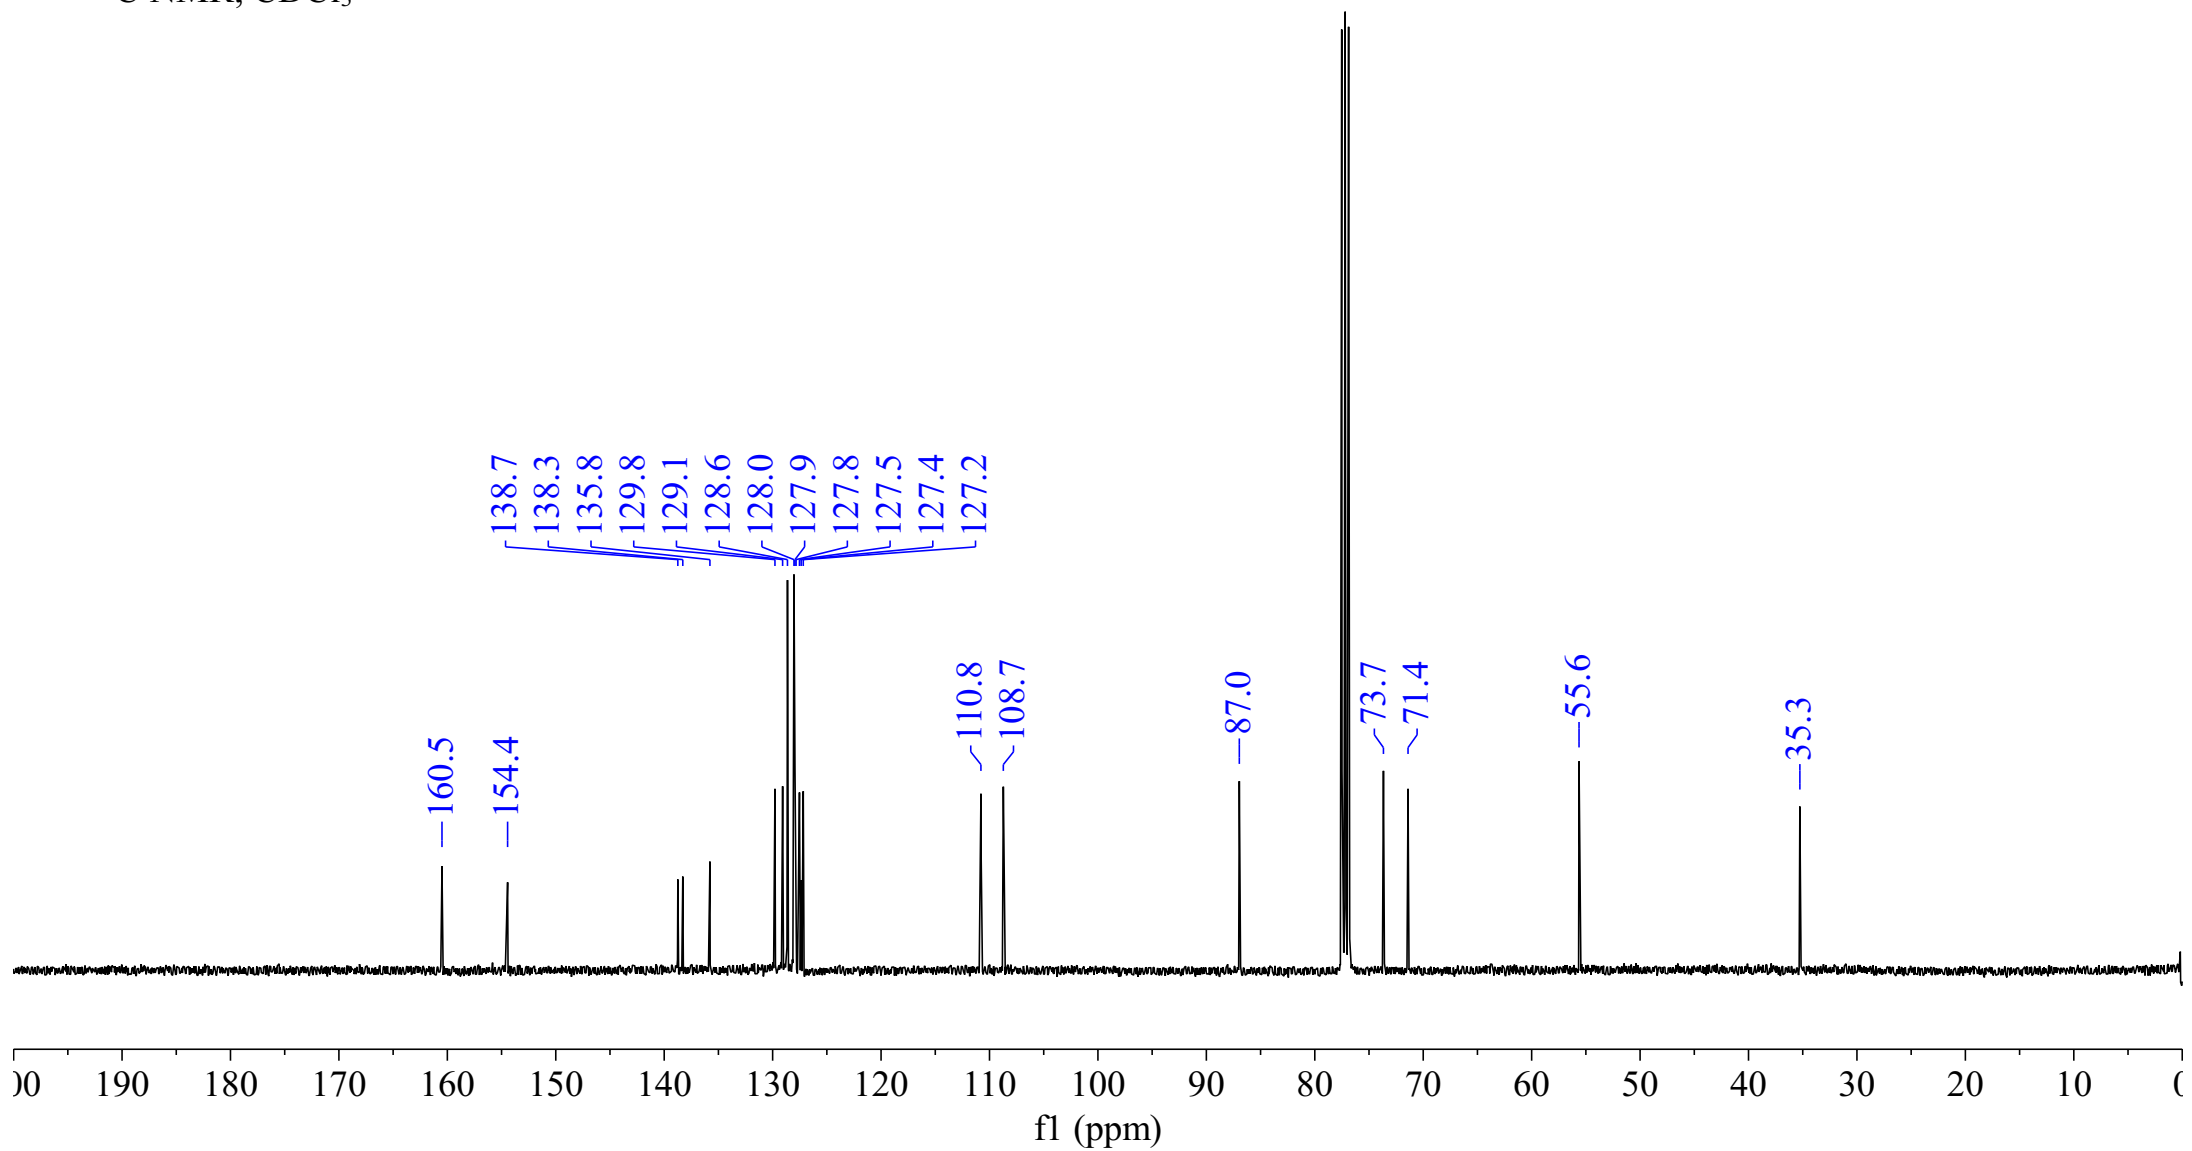

szp-257-4-1.1.fid

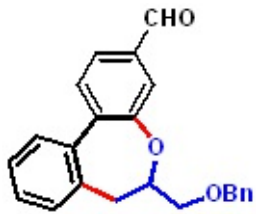

3y

$^1\text{H NMR}$ ,  $\text{CDCl}_3$

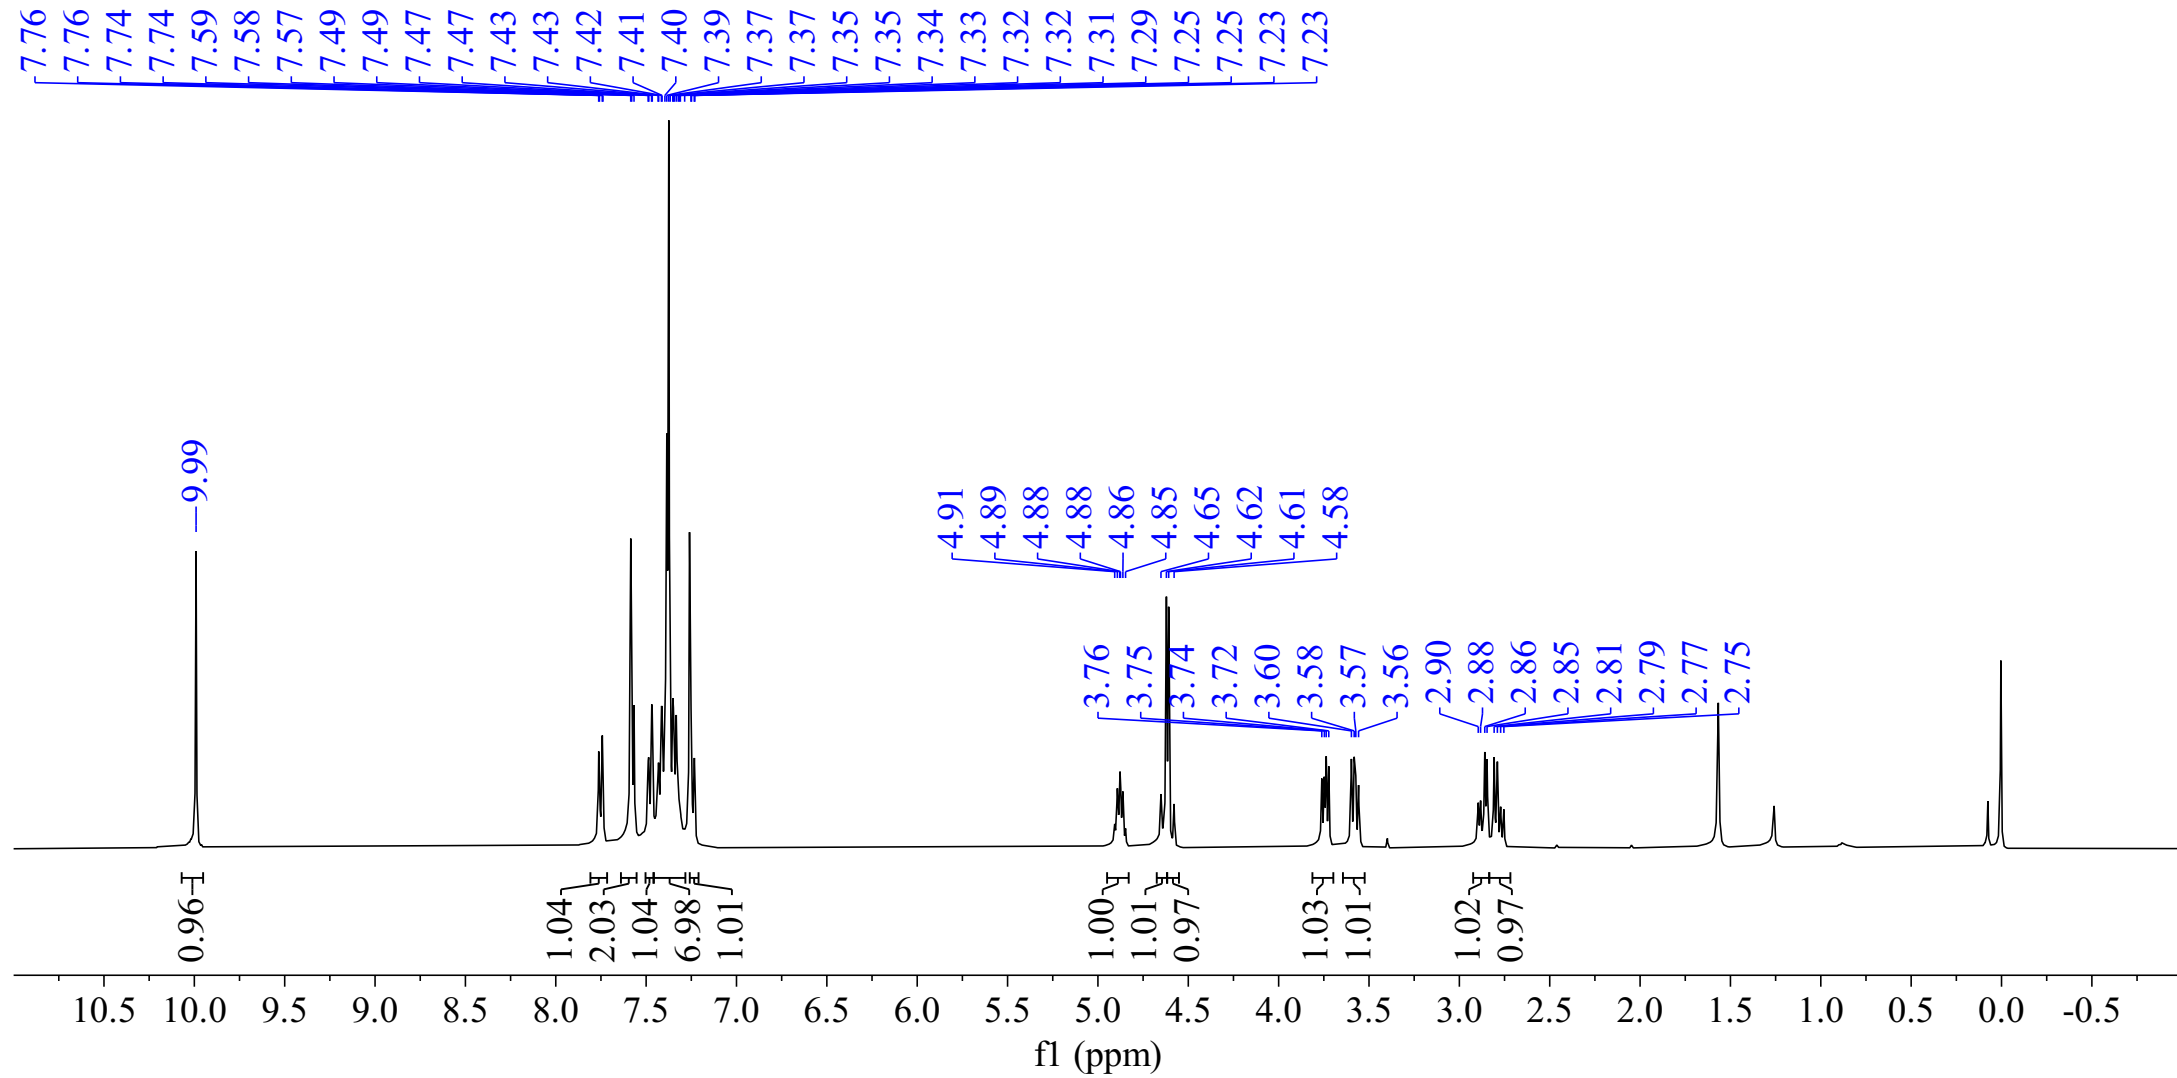

szp-257-4-1.2.fid

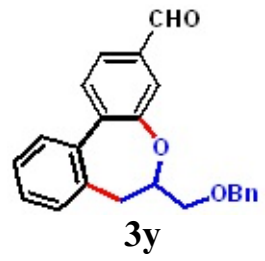

$^{13}\text{C}$  NMR,  $\text{CDCl}_3$

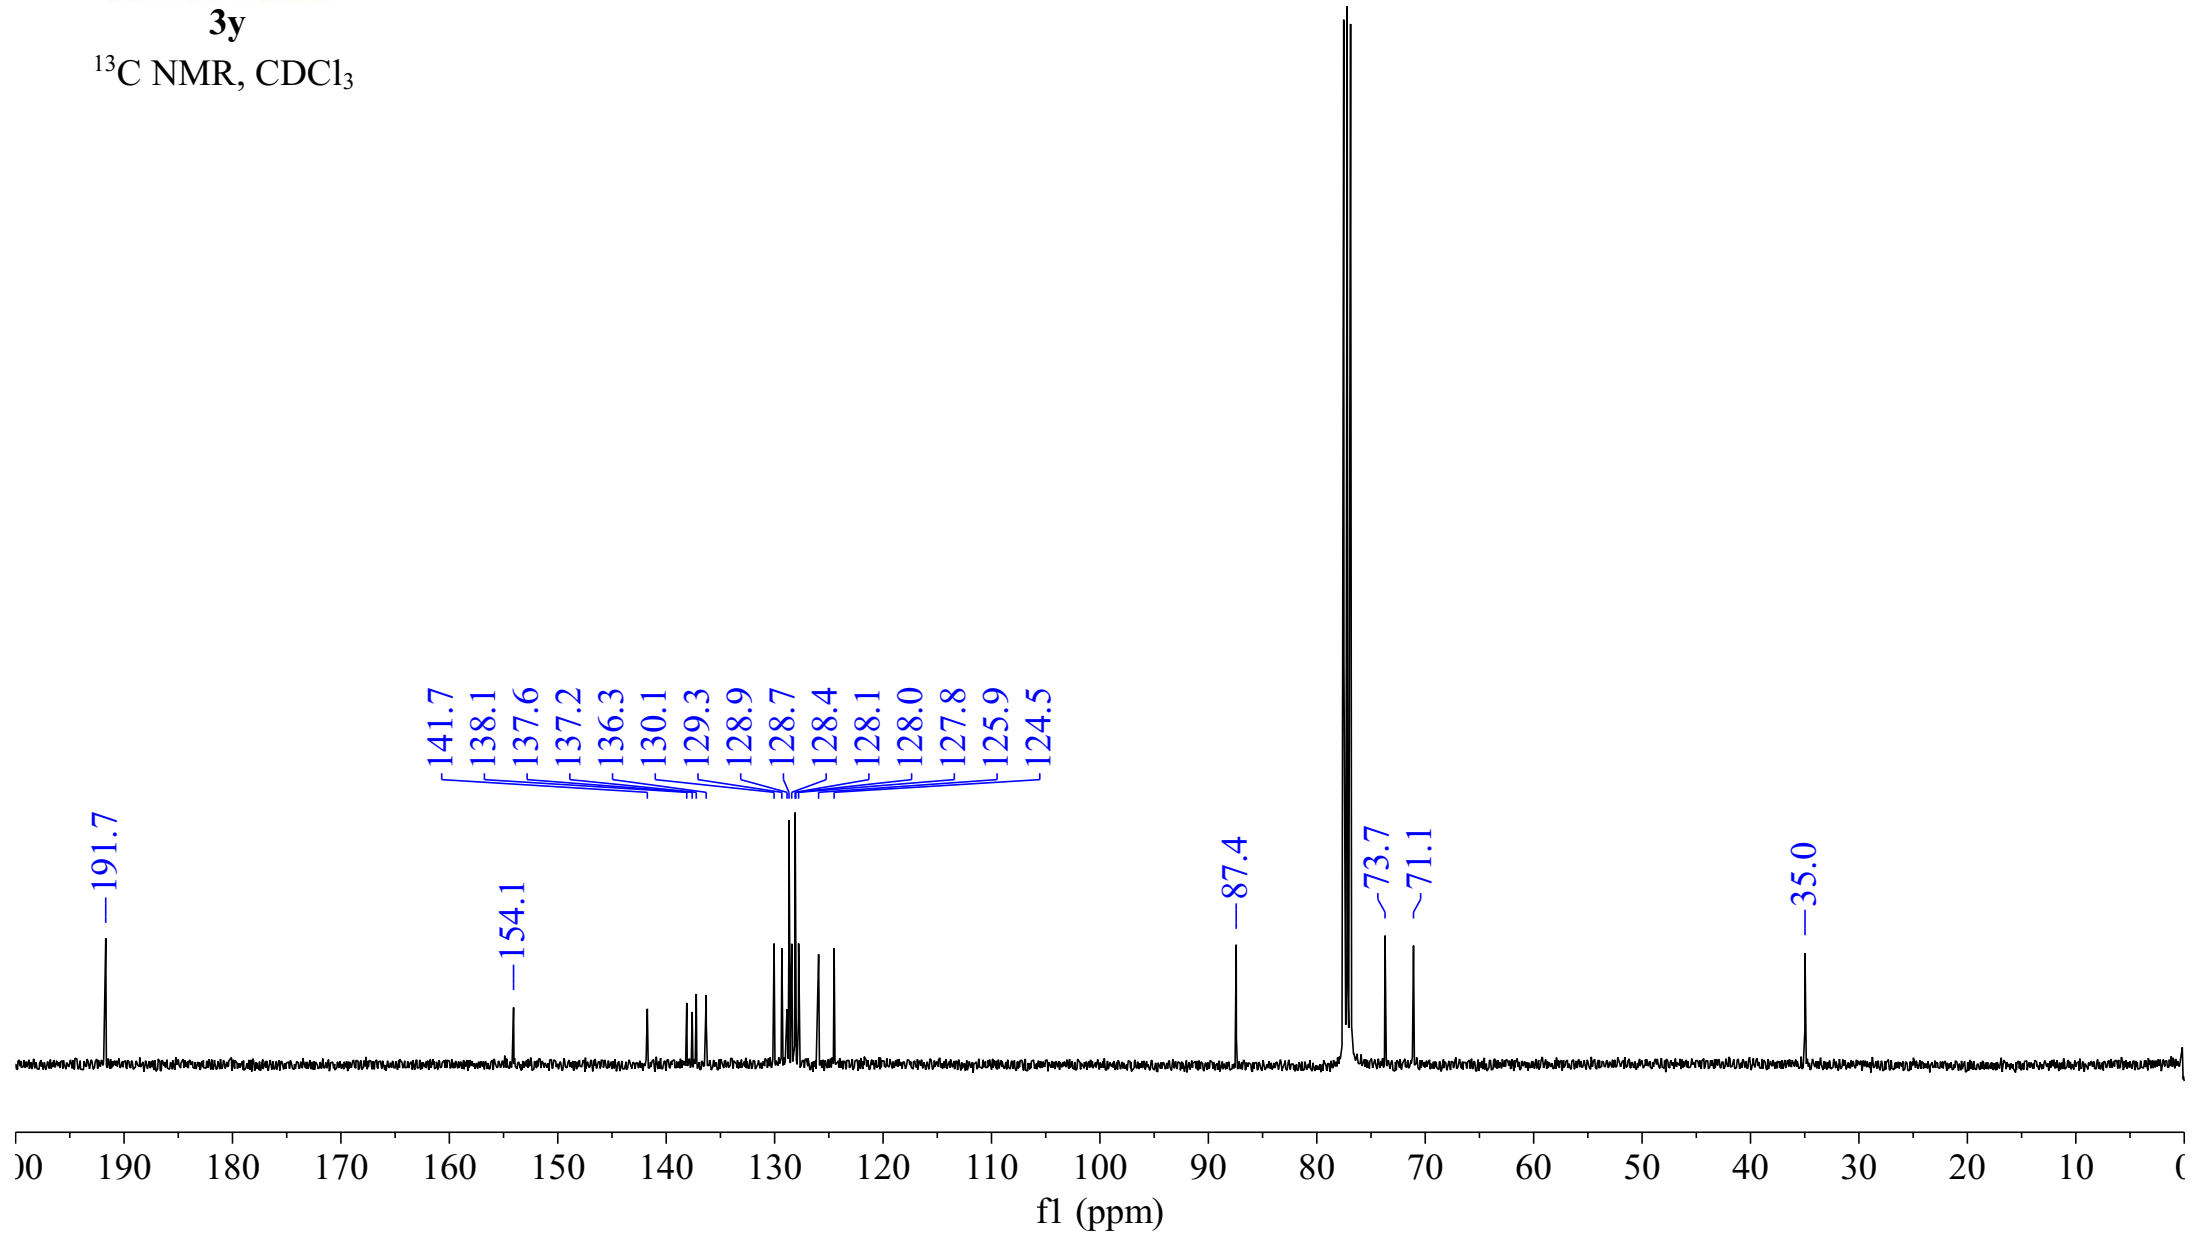

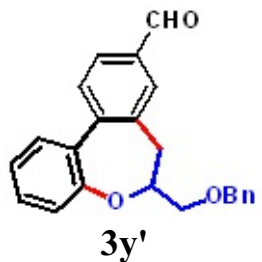

<sup>1</sup>H NMR, CDCl<sub>3</sub>

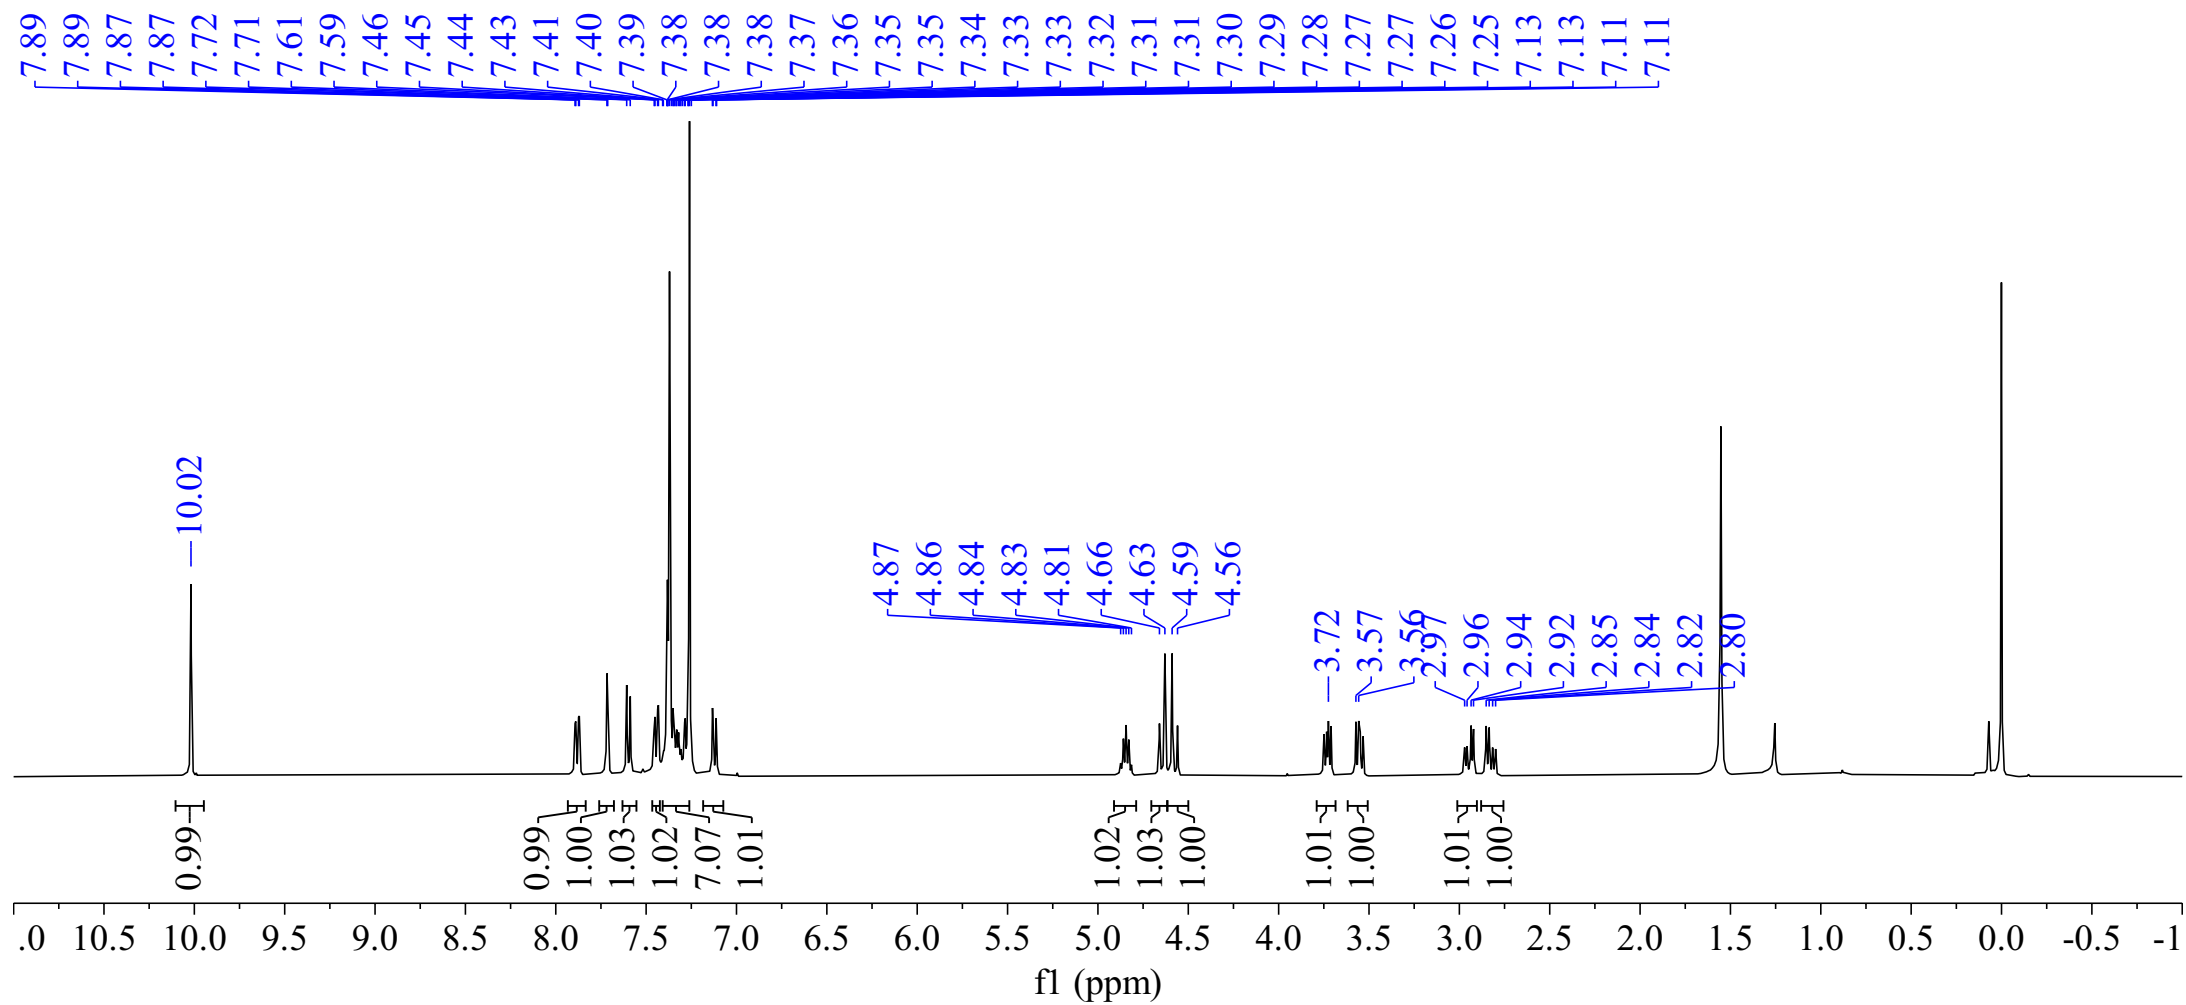

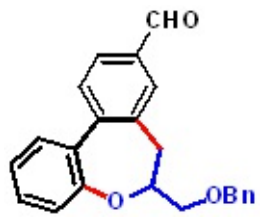

3y'

<sup>13</sup>C NMR, CDCl<sub>3</sub>

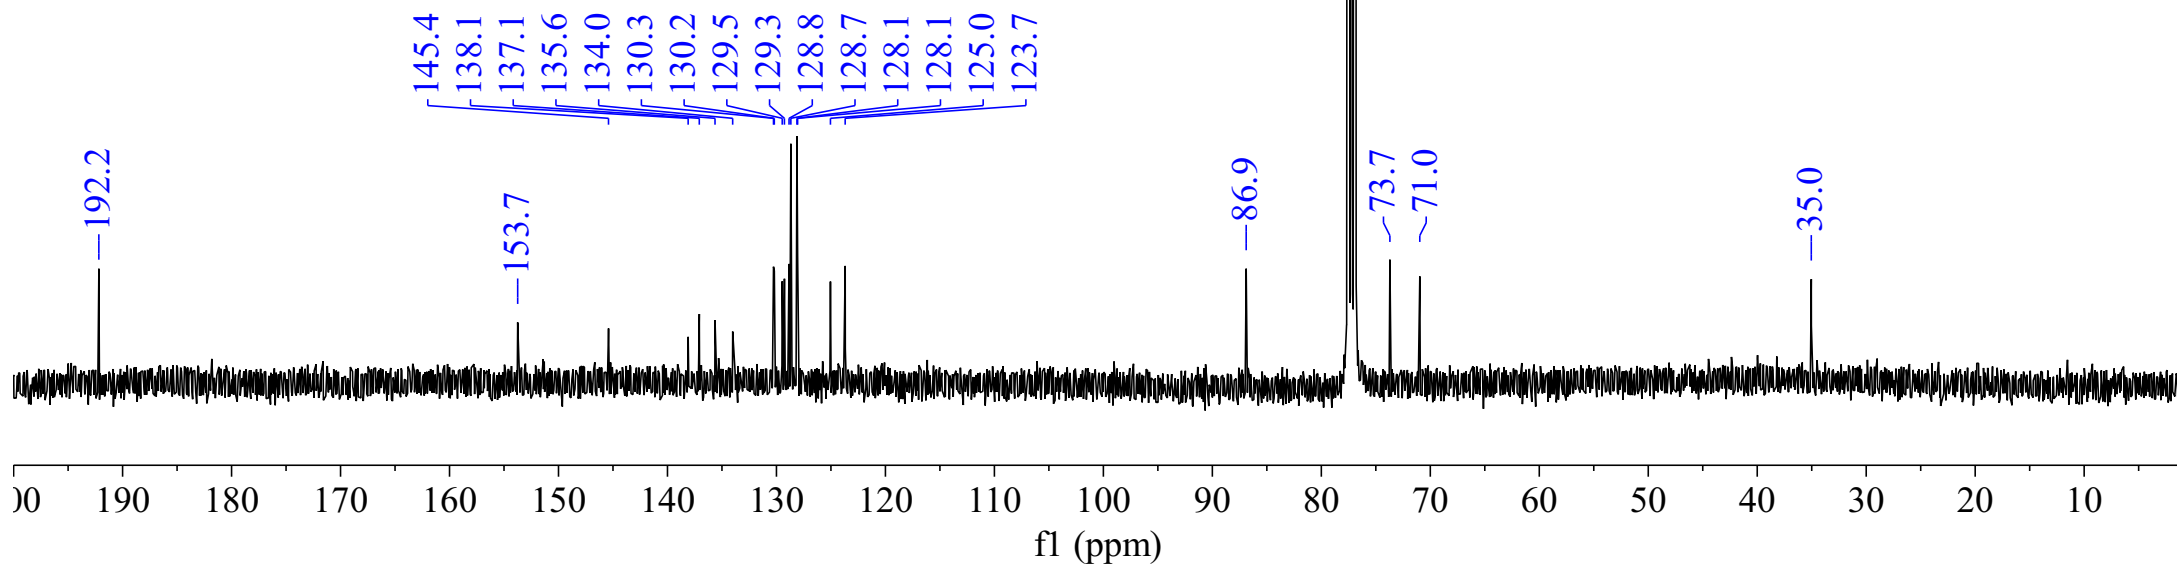

SZP-288-44

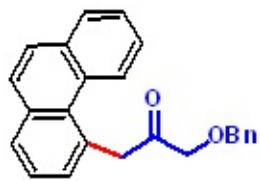

4

$^1\text{H NMR}$ ,  $\text{CDCl}_3$

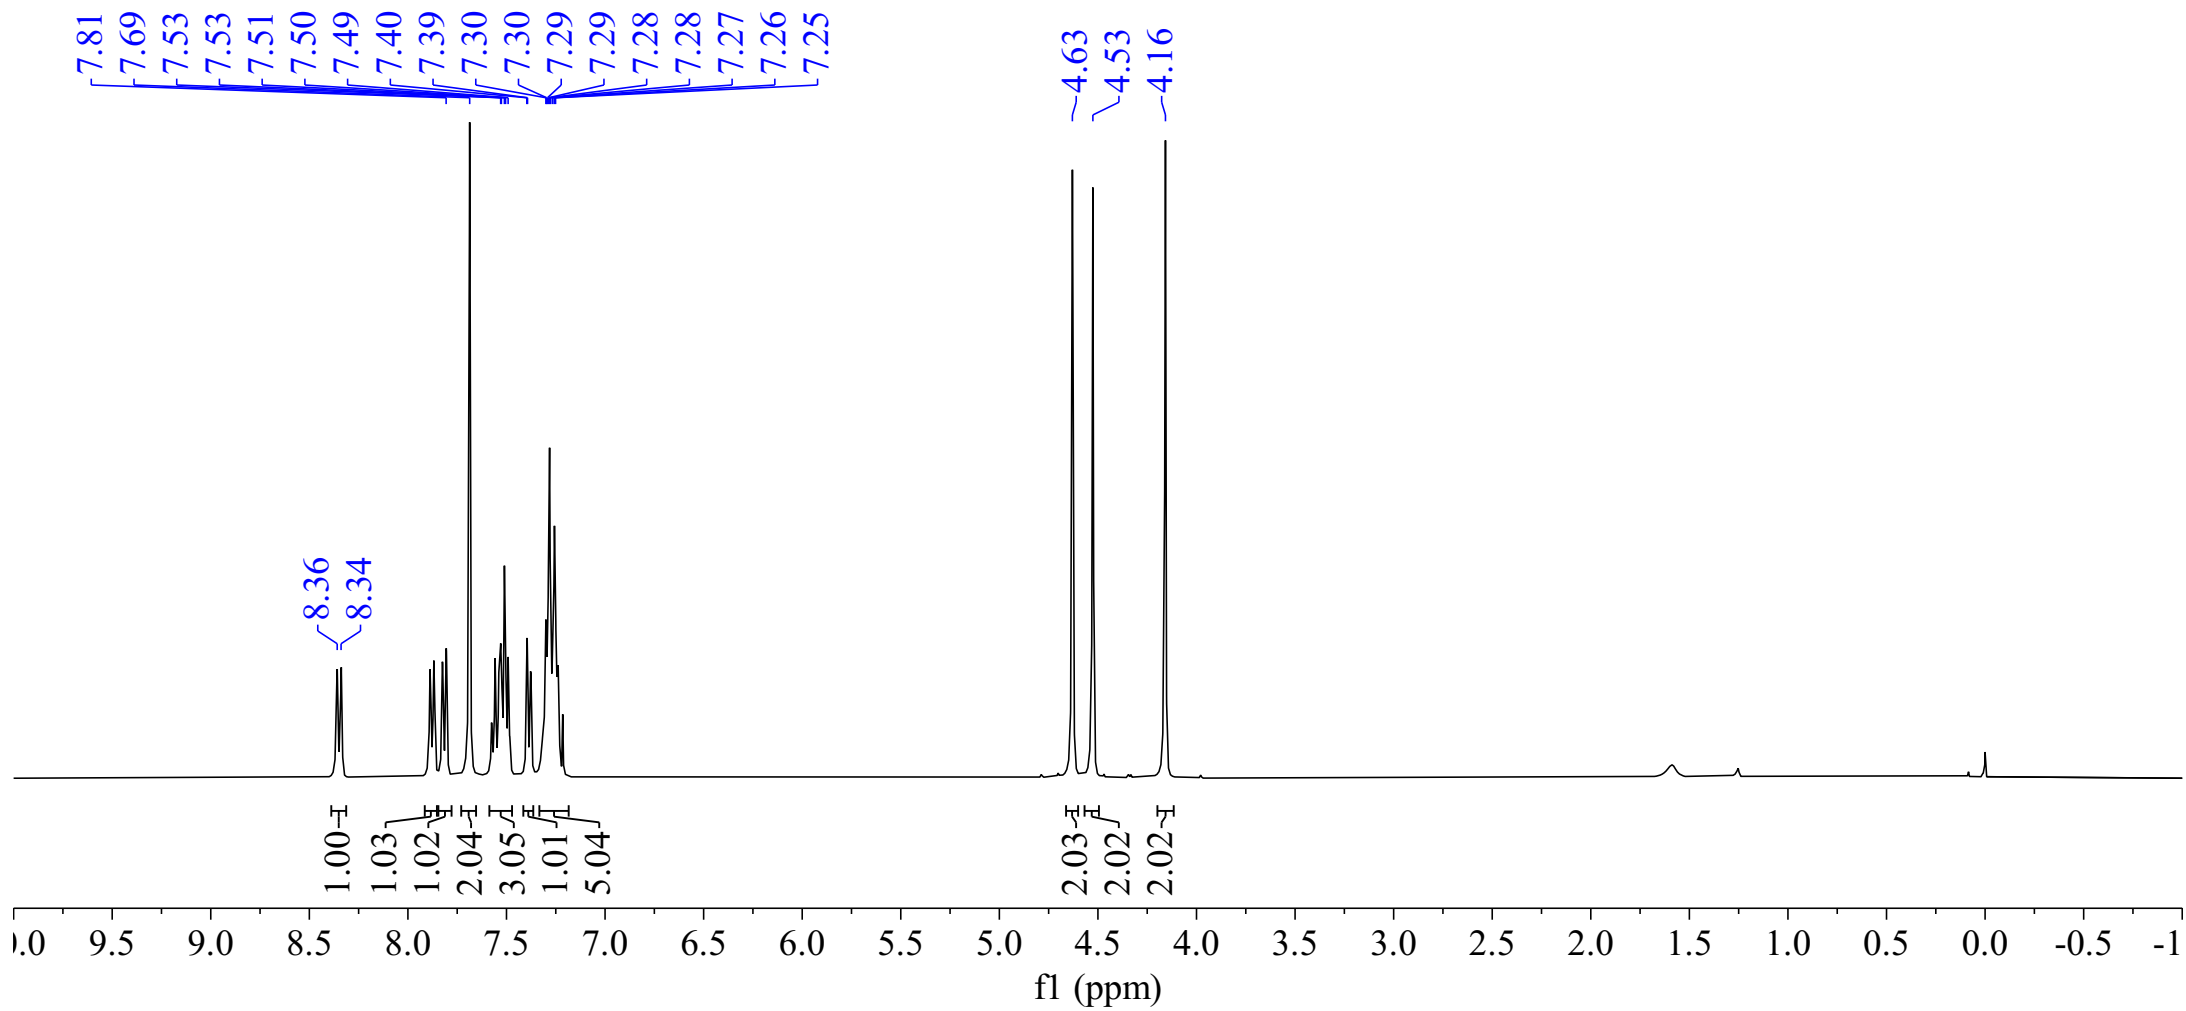



SZP-288-44.2.fid

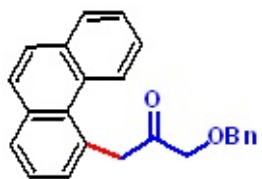

4

$^{13}\text{C}$  NMR,  $\text{CDCl}_3$

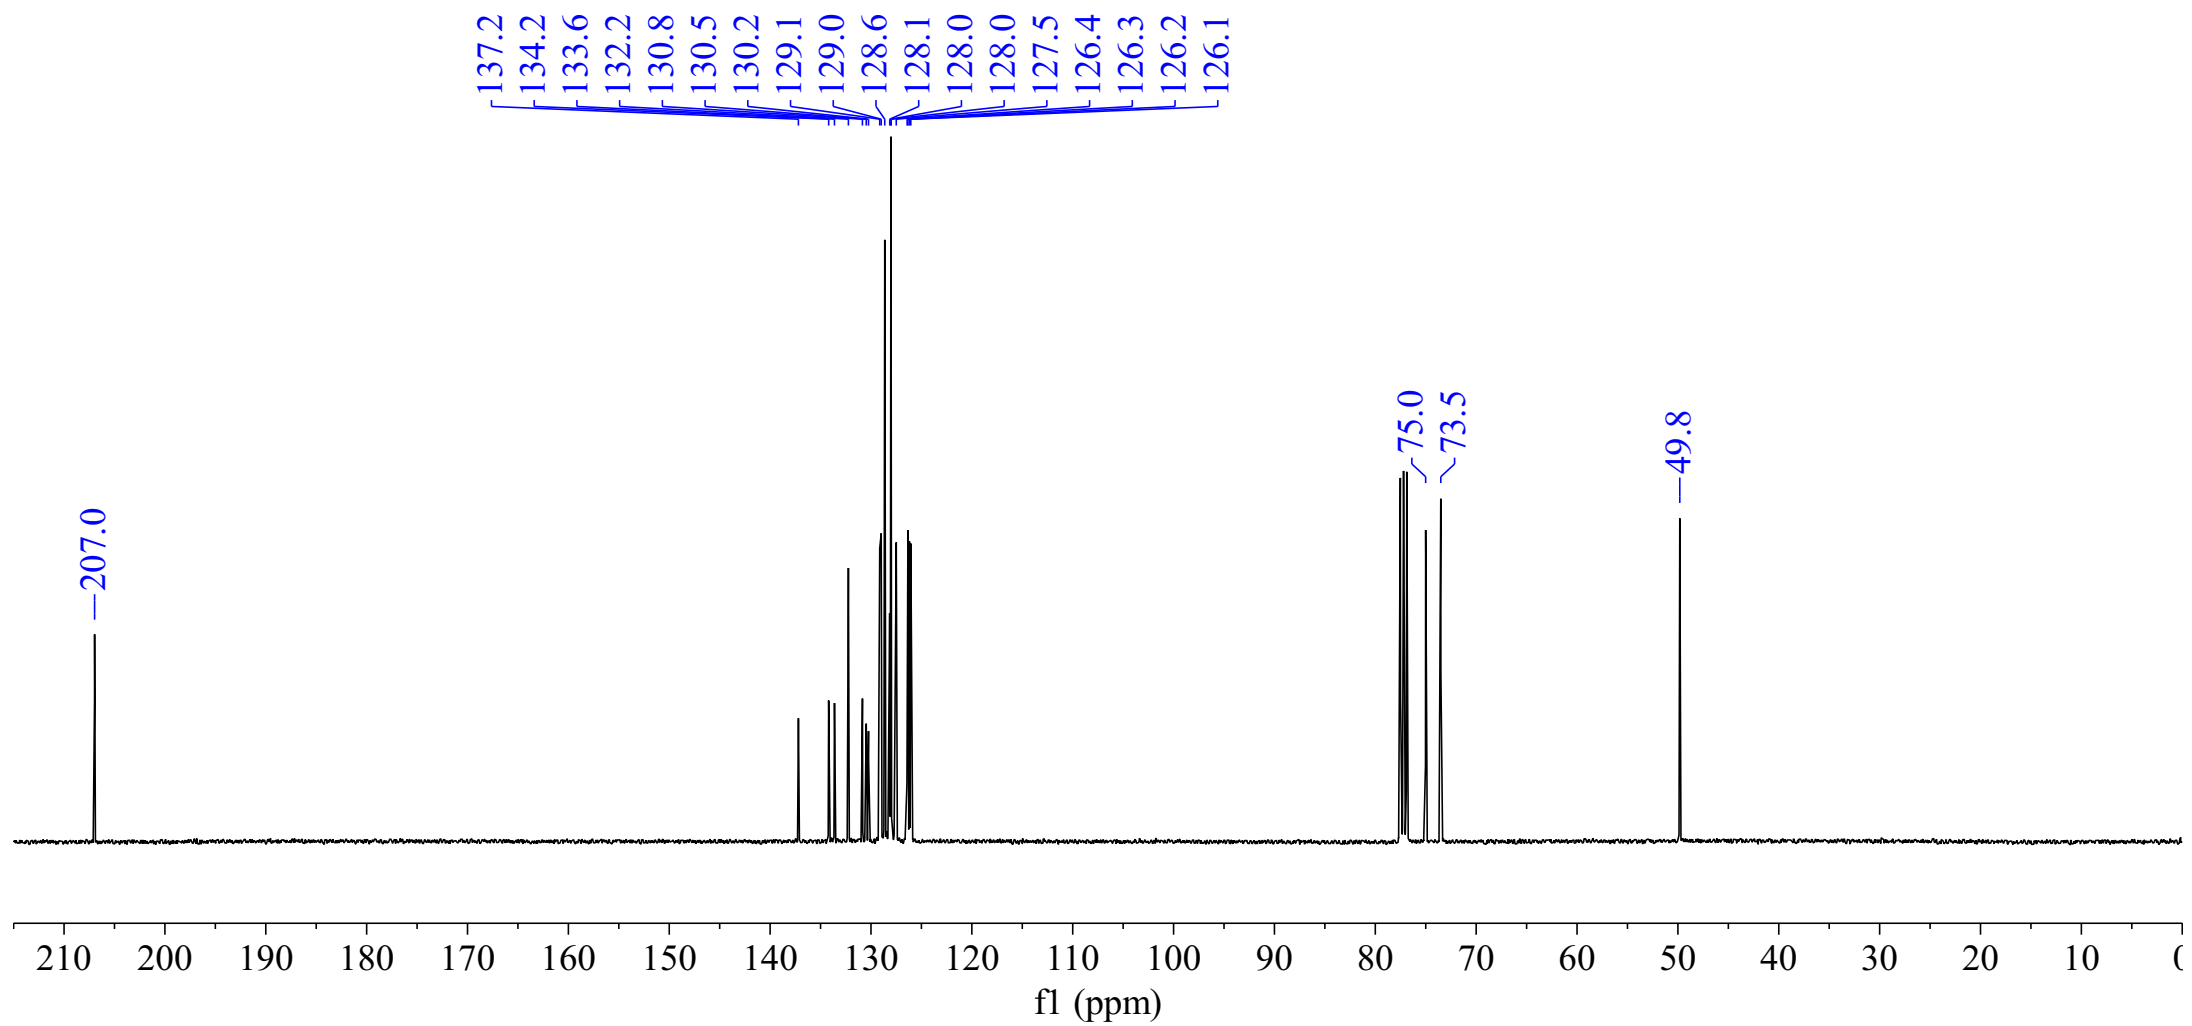

Supplement: d2ob01720b1.pdf [file d2ob01720b1.pdf]
